# Supplementary material
Source: PubMed Central journal article supplement (PMC6648367)

*Supporting Information for*

Copper salts/TBAB -catalyzed chemo- and regioselectivity  $\beta$ -C(sp<sup>3</sup>) –H  
acyloxylation of aliphatic amides

Feifan Wang,<sup>†</sup> Xiaoyue Li,<sup>†</sup> Zhongyu Li,<sup>†</sup> Shuangliu Zhou,<sup>†,‡</sup> and Wu Zhang<sup>\*,†,‡</sup>

<sup>†</sup>College of Chemistry and Materials Science, Anhui Normal University, Wuhu  
241000, China.

<sup>‡</sup>Key Laboratory of Functional Molecular Solids, Ministry of Education

*E-mail address: [zhangwu@mail.ahnu.edu.cn](mailto:zhangwu@mail.ahnu.edu.cn)*

**Table of Contents**

|                                                               |        |
|---------------------------------------------------------------|--------|
| General Information.....                                      | S 2    |
| Preparation of the Starting Materials.....                    | S2     |
| Charaterization Data of Some Starting Materials.....          | S2     |
| Deuteration Experiments.....                                  | S 6    |
| KIE Studies .....                                             | S 7    |
| Copies of <sup>1</sup> H and <sup>13</sup> C NMR Spectra..... | S8–S63 |

## General Information

All starting materials and reagents were commercially available and used directly without further purification. All aliphatic amides were prepared according to the literature procedures. All known products gave satisfactory analytical data by NMR spectra, corresponding to the reported literature values. In addition, unknown compounds were confirmed by HRMS. Melting points were determined using X-4 micro melting point apparatus and are uncorrected. NMR spectra were recorded at room temperature on a Bruker Avance-300, Bruker Avance-400 and Bruker Avance-500 at 300 MHz, 400 MHz and 500 MHz with tetramethylsilane (TMS) as an internal standard. Chemical shifts are given in  $\delta$  relative to TMS, the coupling constants  $J$  are given in Hz. High-resolution mass spectra (HRMS) were recorded on Agilent 6200 LC/MS TOF using ESI in positive mode.

## Preparation of the Starting Materials

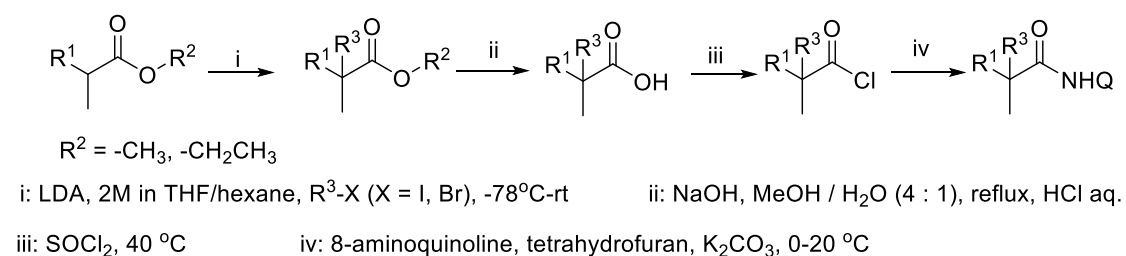

### Scheme S1 Preparation of the starting materials

To this LDA solution (5 mL, 10 mmol), carboxylate ester (10 mmol) was added dropwise at  $-78^\circ C$  and the mixture was stirred at this temperature for 1 h. Alkyl halide (15 mmol) was then added dropwise to the solution at  $-78^\circ C$ . After the addition, the mixture was warmed to room temperature and stirred overnight. Then the mixture was quenched with water at  $0^\circ C$ , and the aqueous phase was extracted with ethyl acetate ( $3 \times 10$  mL). The organic layer was dried over  $Na_2SO_4$  and then evaporated in vacuo to give the crude ester.

To the ester was added a solution of NaOH and methanol /  $H_2O$  (4:1, 15 mL). The mixture was stirred and reflux at  $110^\circ C$  for 8 h. Then the pH of the mixture was adjusted to 3-4 with HCl. The mixture was then saturated with NaCl and extracted with ethyl acetate ( $3 \times 10$  mL). The combined organic layers was dried over  $Na_2SO_4$ , and then evaporated in vacuo to give the crude carboxylic acid, which was used directly for the next step without further purification.

Thionyl chloride (10 mL) was added slowly to a stirred solution of the carboxylic

acid. The mixture was stirred for 6 h at 40 °C and evaporated in vacuo to give the crude acid chloride, which was used directly for the next step without further purification. The acid chloride was added dropwise to a solution of 8-aminoquinoline (1.44 g, 10 mmol) and K<sub>2</sub>CO<sub>3</sub> (1.66 g, 12 mmol) in tetrahydrofuran (10 mL). The mixture was stirred overnight at room temperature. The reaction mixture quenched with saturated sodium chloride and diluted with ethyl acetate. The aqueous phase was extracted with ethyl acetate (3×10 mL). The organic layer was dried over Na<sub>2</sub>SO<sub>4</sub>. After concentration, the resulting residue was purified by flash chromatography on silica gel with petroleum ether: ethyl acetate (10:1) as eluent to afford corresponding 8-aminoquinolinyl amides.

### Characterization Data of Some Starting Materials

#### 2,2-Dimethyl-N-(quinolin-8-yl)butanamide 1a

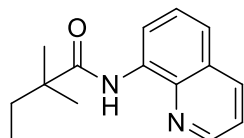

White solid (2.23 g, 92%). Mp = 39.0-40.1 °C. <sup>1</sup>H NMR (500 MHz, CDCl<sub>3</sub>): δ 10.24 (s, 1H), 8.85-8.82 (m, 1H), 8.81 (dd, *J* = 4.5, 1.5 Hz, 1H), 8.16 (dd, *J* = 8.5, 1.5 Hz, 1H), 7.56-7.51 (m, 1H), 7.51-7.47 (m, 1H), 7.47-7.42 (m, 1H), 1.77 (q, *J* = 7.5 Hz, 2H), 1.40 (s, 6H), 0.96 (t, *J* = 7.5 Hz, 3H).

#### 2-Ethyl-2-methyl-N-(quinolin-8-yl)butanamide 1b

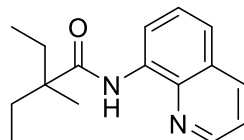

Yellow liquid (1.56 g, 61%). <sup>1</sup>H NMR (500 MHz, CDCl<sub>3</sub>): δ 10.22 (s, 1H), 8.85-8.79 (m, 2H), 8.17-8.11 (m, 1H), 7.56-7.50 (m, 1H), 7.50-7.40 (m, 2H), 1.96-1.83 (m, 2H), 1.70-1.58 (m, 2H), 1.35 (s, 3H), 0.94 (t, *J* = 7.5 Hz, 6H).

#### 2-Ethyl-2-methyl-N-(quinolin-8-yl)pentanamide 1c

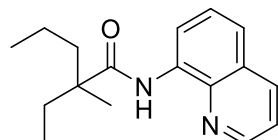

Yellow liquid (1.75 g, 65%). <sup>1</sup>H NMR (500 MHz, CDCl<sub>3</sub>): δ 10.23 (s, 1H), 8.86-8.76 (m, 2H), 8.18-8.08 (m, 1H), 7.55-7.50 (m, 1H), 7.49-7.45 (m, 1H), 7.45-7.41 (m, 1H), 1.95-1.85 (m, 1H), 1.81 (td, *J* = 13.0, 4.5 Hz, 1H), 1.69-1.60 (m, 1H), 1.56 (td, *J* = 12.5, 5.0 Hz, 1H), 1.49-1.38 (m, 1H), 1.37 (s, 3H), 1.35-1.24 (m, 1H), 0.97-0.89 (m, 6H).

### 2-Ethyl-2-methyl-N-(quinolin-8-yl)hexanamide 1d

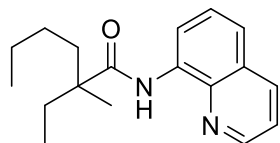

Yellow liquid (1.85 g, 65%).  $^1\text{H NMR}$  (500 MHz,  $\text{CDCl}_3$ ):  $\delta$  10.23 (s, 1H), 8.87-8.77 (m, 2H), 8.20-8.09 (m, 1H), 7.55-7.50 (m, 1H), 7.50-7.46 (m, 1H), 7.46-7.41 (m, 1H), 1.94-1.87 (m, 1H), 1.87-1.79 (m, 1H), 1.68-1.61 (m, 1H), 1.61-1.53 (m, 1H), 1.37 (s, 3H), 1.35-1.22 (m, 4H), 0.94 (t,  $J = 7.5$  Hz, 3H), 0.88 (t,  $J = 7.0$  Hz, 3H).

### 2-Methyl-2-propyl-N-(quinolin-8-yl)pentanamide 1f

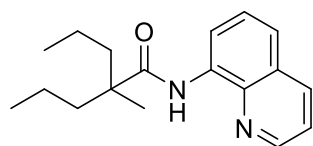

White solid (1.70 g, 60%). Mp = 69.2-71.4 °C.  $^1\text{H NMR}$  (500 MHz,  $\text{CDCl}_3$ ):  $\delta$  10.23 (s, 1H), 8.85-8.75 (m, 2H), 8.16 (dd,  $J = 8.0, 1.5$  Hz, 1H), 7.56-7.51 (m, 1H), 7.50-7.47 (m, 1H), 7.47-7.42 (m, 1H), 1.81 (td,  $J = 13.0, 4.5$  Hz, 2H), 1.56 (td,  $J = 13.0, 4.5$  Hz, 2H), 1.46-1.38 (m, 2H), 1.38 (s, 3H), 1.36-1.26 (m, 2H), 0.92 (t,  $J = 7.5$  Hz, 6H),

### 2-Ethyl-2-methyl-4-phenyl-N-(quinolin-8-yl)butanamide 1i

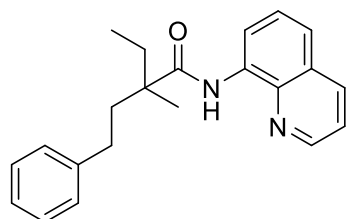

Yellow liquid (1.89g, 57%).  $^1\text{H NMR}$  (500 MHz,  $\text{CDCl}_3$ ):  $\delta$  10.28 (s, 1H), 8.87-8.80 (m, 2H), 8.21-8.13 (m, 1H), 7.58-7.53 (m, 1H), 7.52-7.48 (m, 1H), 7.48-7.43 (m, 1H), 7.26-7.18 (m, 4H), 7.17-7.12 (m, 1H), 2.75-2.58 (m, 2H), 2.18 (td,  $J = 13.0, 4.5$  Hz, 1H), 2.00-1.91 (m, 1H), 1.88 (td,  $J = 13.0, 5.0$  Hz, 1H), 1.76-1.65 (m, 1H), 1.47 (s, 3H), 0.98 (t,  $J = 7.5$  Hz, 3H).

### 3-Benzyl-2-methyl-N-(quinolin-8-yl)butanamide 1j

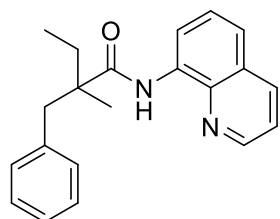

White solid (1.84 g, 58%). Mp = 71.8-74.4 °C.  $^1\text{H NMR}$  (500 MHz,  $\text{CDCl}_3$ ):  $\delta$  10.13 (s, 1H), 8.84 (dd,  $J = 7.5, 1.5$  Hz, 1H), 8.74 (dd,  $J = 4.0, 1.5$  Hz, 1H), 8.15 (dd,  $J = 8.0, 1.5$  Hz, 1H), 7.58-7.53 (m, 1H), 7.52-7.48 (m, 1H), 7.45-7.40 (m, 1H), 7.21-7.14 (m, 4H), 7.14-7.09 (m, 1H), 3.30-3.20 (m, 1H), 2.88-2.77 (m, 1H), 2.09-2.00 (m, 1H), 1.64-1.56 (m, 1H), 1.34 (s, 3H), 0.99 (t,  $J = 7.5$  Hz, 3H).

### 1-Methyl-N-(quinolin-8-yl)cyclobutane-1-carboxamide **1k**

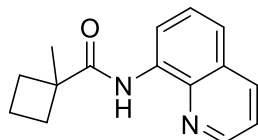

Yellow liquid (1.27 g, 53%).  $^1\text{H NMR}$  (500 MHz,  $\text{CDCl}_3$ ):  $\delta$  9.99 (s, 1H), 8.85-8.77 (m, 2H), 8.16 (dd,  $J = 8.0, 1.5$  Hz, 1H), 7.57-7.52 (m, 1H), 7.51-7.47 (m, 1H), 7.47-7.43 (m, 1H), 2.74-2.62 (m, 2H), 2.12-1.98 (m, 3H), 1.96-1.87 (m, 1H), 1.64 (s, 3H).

### 1-Methyl-N-(quinolin-8-yl)cyclohexane-1-carboxamide **1o**

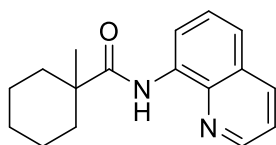

Yellow liquid (1.34 g, 50%).  $^1\text{H NMR}$  (500 MHz,  $\text{CDCl}_3$ ):  $\delta$  10.29 (s, 1H), 8.93-8.68 (m, 2H), 8.25-8.10 (m, 1H), 7.56-7.51 (m, 1H), 7.50-7.47 (m, 1H), 7.46-7.42 (m, 1H), 2.26-2.13 (m, 2H), 1.70-1.63 (m, 2H), 1.62-1.56 (m, 2H), 1.57-1.49 (m, 3H), 1.47-1.38 (m, 1H), 1.36 (s, 3H).

### 1-(Methyl- $\text{d}_3$ )-N-(quinolin-8-yl)cyclopentane-1-carboxamide [ $\text{D}_3$ ]-**1l**

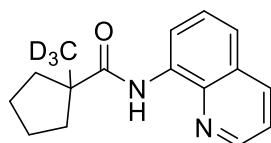

Yellow liquid (1.44 g, 56%).  $^1\text{H NMR}$  (500 MHz,  $\text{CDCl}_3$ ):  $\delta$  10.20 (s, 1H), 8.84-8.74 (m, 2H), 8.19-8.10 (m, 1H), 7.55-7.50 (m, 1H), 7.49-7.45 (m, 1H), 7.45-7.41 (m, 1H), 2.34-2.24 (m, 2H), 1.88-1.75 (m, 4H), 1.74-1.64 (m, 2H).

## Deuteration Experiments

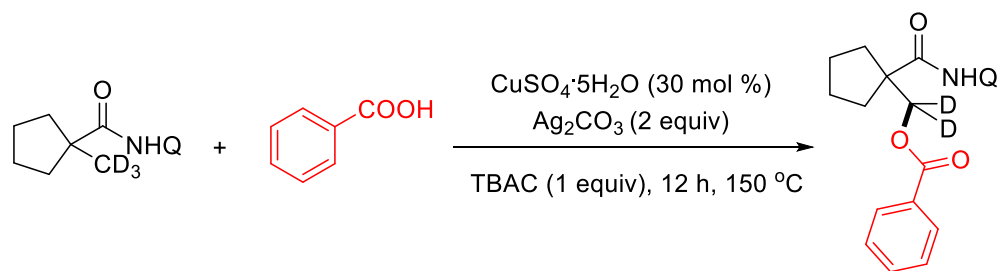

**[D<sub>3</sub>]-1I**  
0.1 mmol, >99% D      **2a**, 0.2 mmol

**[D<sub>2</sub>]-3Ia**, 52%, >99% D

To a 10 mL reaction tube was added amide **[D<sub>3</sub>]-1I** (0.1 mmol), acid **2a** (0.2 mmol),  $\text{CuSO}_4 \cdot 5\text{H}_2\text{O}$  (7.5 mg, 30 mol %),  $\text{Ag}_2\text{CO}_3$  (55.1 mg, 2 equiv), TBAC (27.8 mg, 1 equiv) and toluene / DMF (1 mL / 1 mL) in air. The mixture was stirred at 150 °C for 12 h. The reaction mixture was then cooled to room temperature, diluted with ethyl acetate and quenched with saturated sodium chloride. The aqueous phase was extracted with ethyl acetate (3×10 mL). The organic layer was dried over  $\text{Na}_2\text{SO}_4$ . After concentration, the resulting residue was purified by flash chromatography to afford the product. The product was analyzed by  $^1\text{H}$  NMR.

**Figure S1.  $^1\text{H}$  NMR Spectra of **[D<sub>2</sub>]-3Ia****

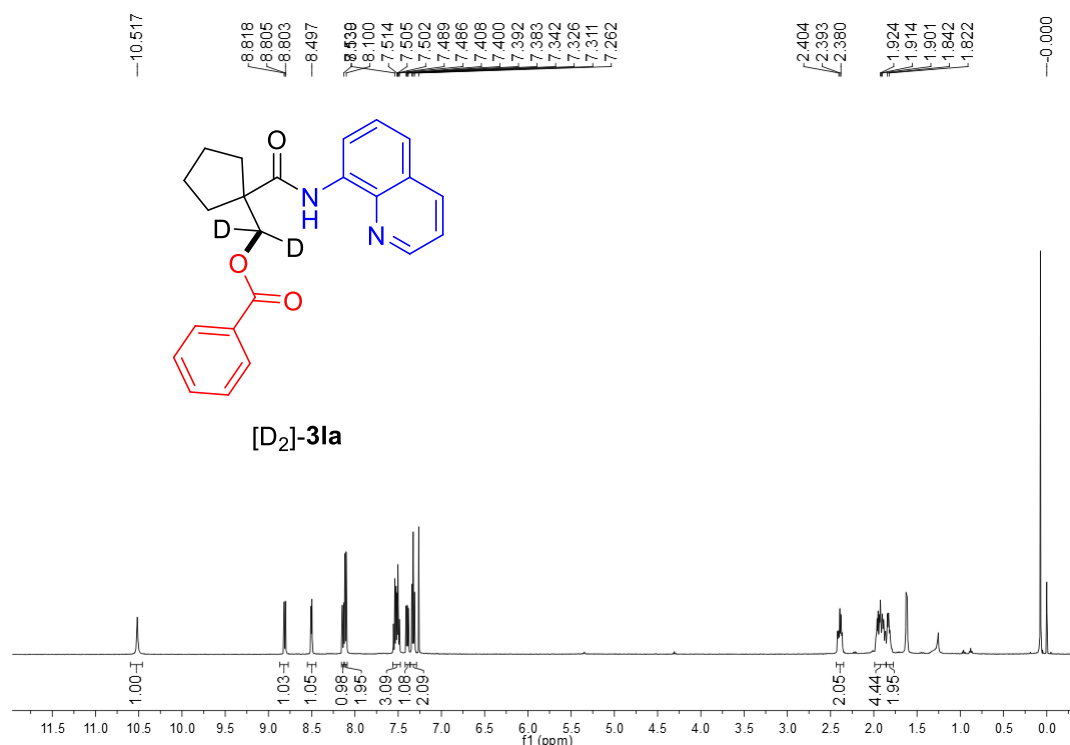

## KIE Studies

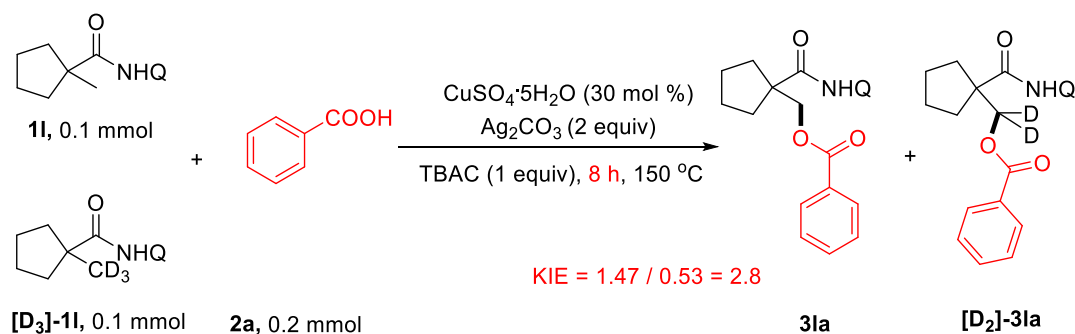

To a 10 mL reaction tube was added amide  $[\text{D}_3]\text{-1I}$  (0.1 mmol),  $\text{1I}$  (0.1 mmol), acid  $\text{2a}$  (0.2 mmol),  $\text{CuSO}_4 \cdot 5\text{H}_2\text{O}$  (7.5 mg, 30 mol %),  $\text{Ag}_2\text{CO}_3$  (55.1 mg, 2 equiv), TBAC (27.8 mg, 1 equiv) and toluene / DMF (1 mL / 1 mL) in air. The mixture was stirred at 150 °C for 8 h. The reaction mixture was then cooled to room temperature, diluted with ethyl acetate and quenched with saturated sodium chloride. The aqueous phase was extracted with ethyl acetate (3×10 mL). The organic layer was dried over  $\text{Na}_2\text{SO}_4$ . After concentration, the resulting residue was purified by flash chromatography to afford the product. The product was analyzed by  $^1\text{H}$  NMR.

Figure S2.  $^1\text{H}$  NMR Spectra of  $[\text{D}_2]\text{-3Ia}$

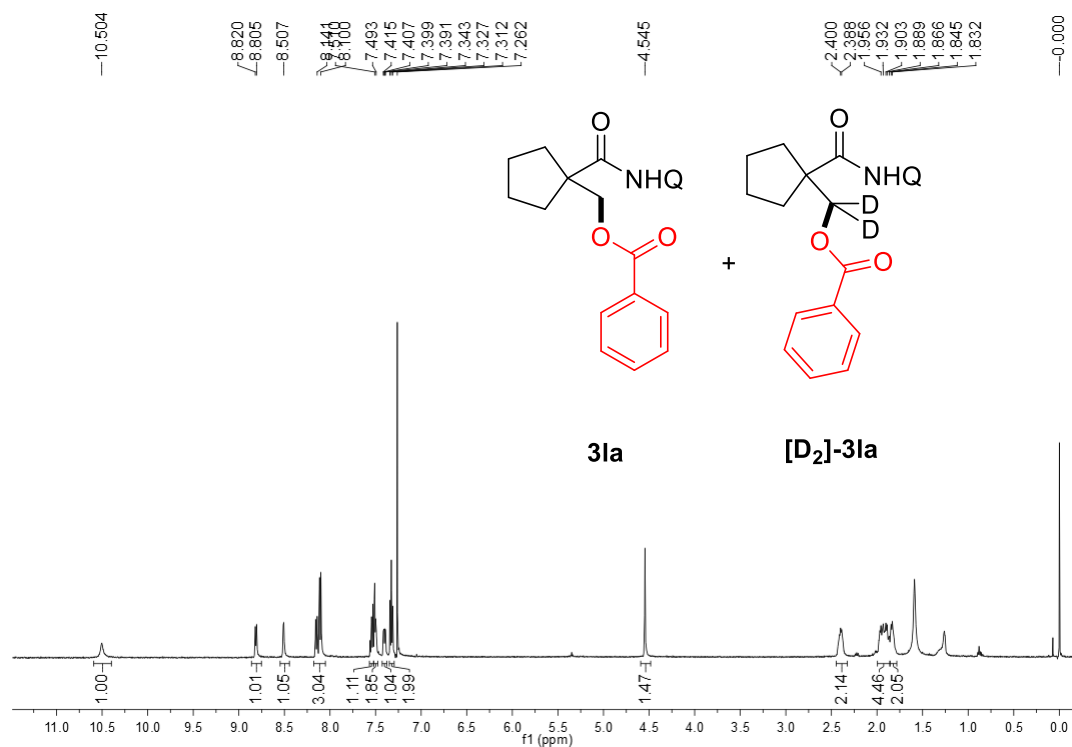

# Copies of $^1\text{H}$ and $^{13}\text{C}$ NMR Spectra

## Figure S3. $^1\text{H}$ NMR Spectra of 1a

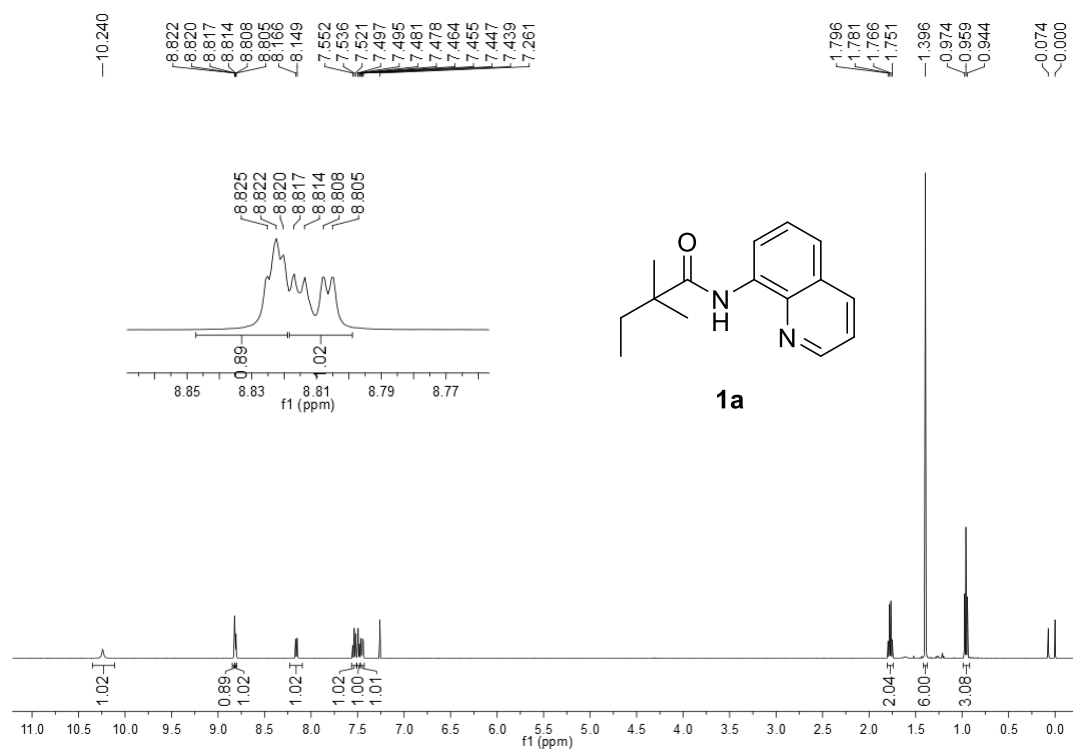

## Figure S4. $^1\text{H}$ NMR Spectra of 1b

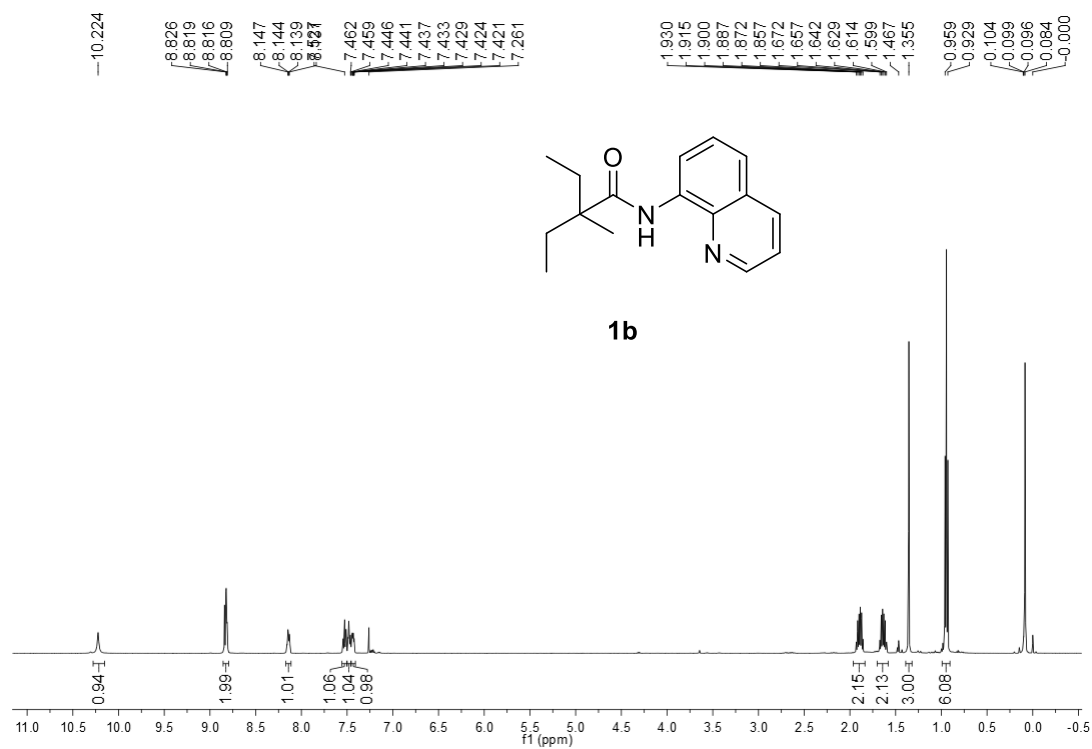



Figure S5. <sup>1</sup>H NMR Spectra of 1c

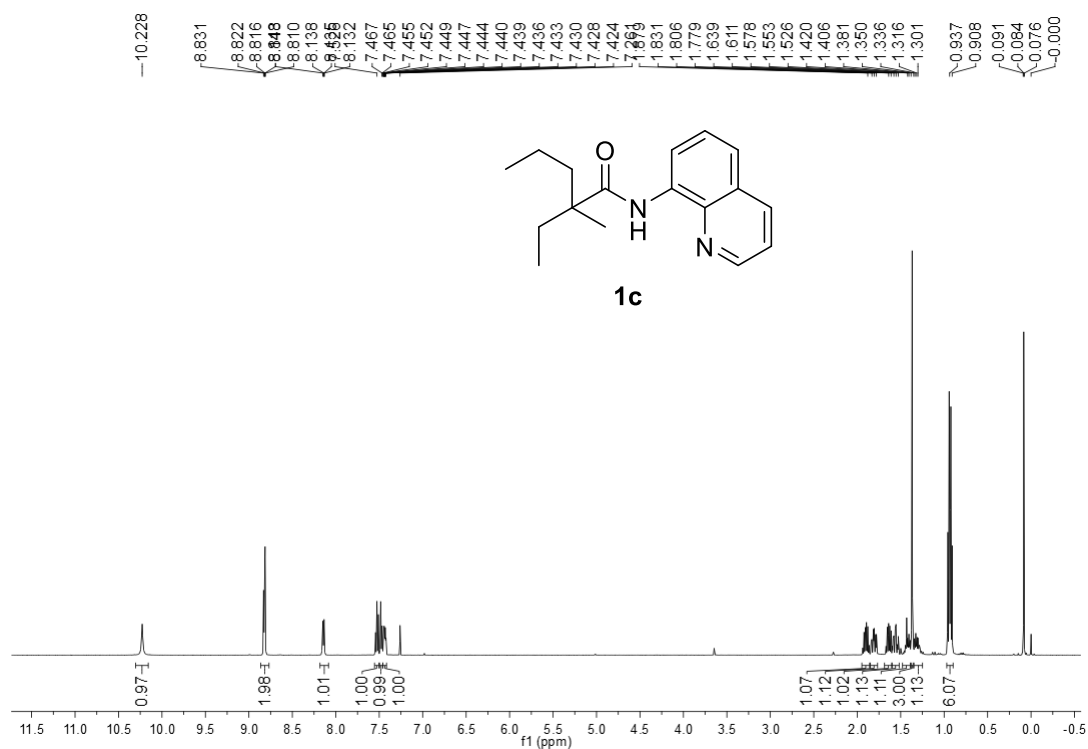

Figure S6. <sup>1</sup>H NMR Spectra of 1d

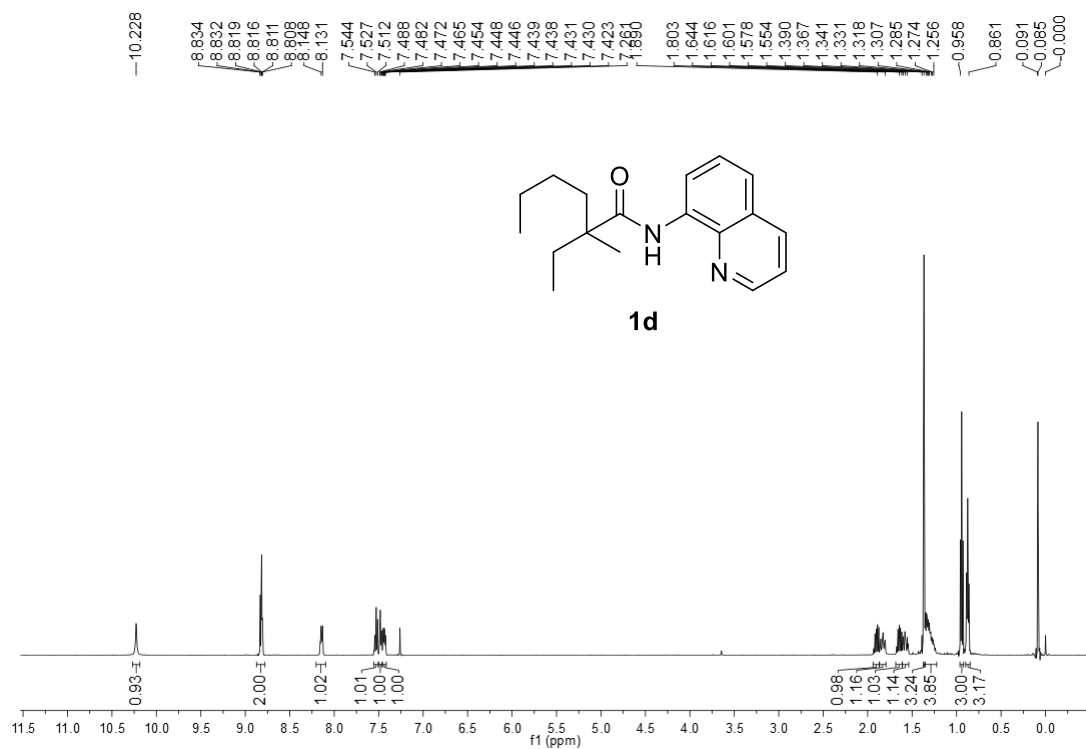

Figure S7. <sup>1</sup>H NMR Spectra of 1f

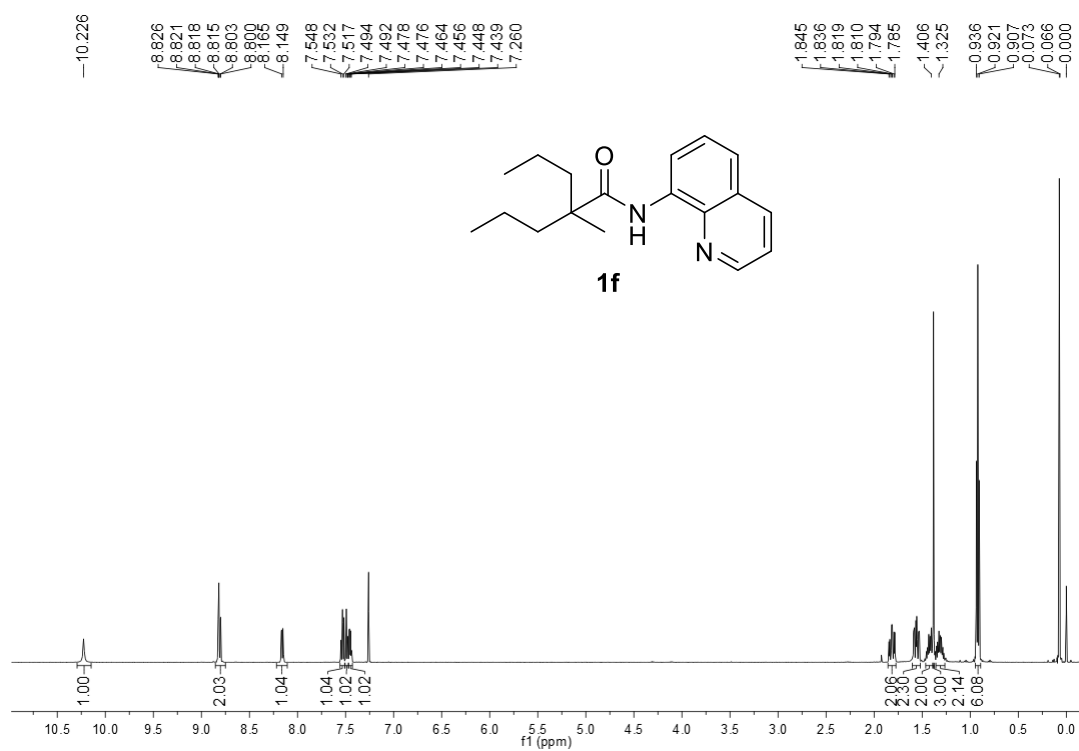

Figure S8. <sup>1</sup>H NMR Spectra of 1i

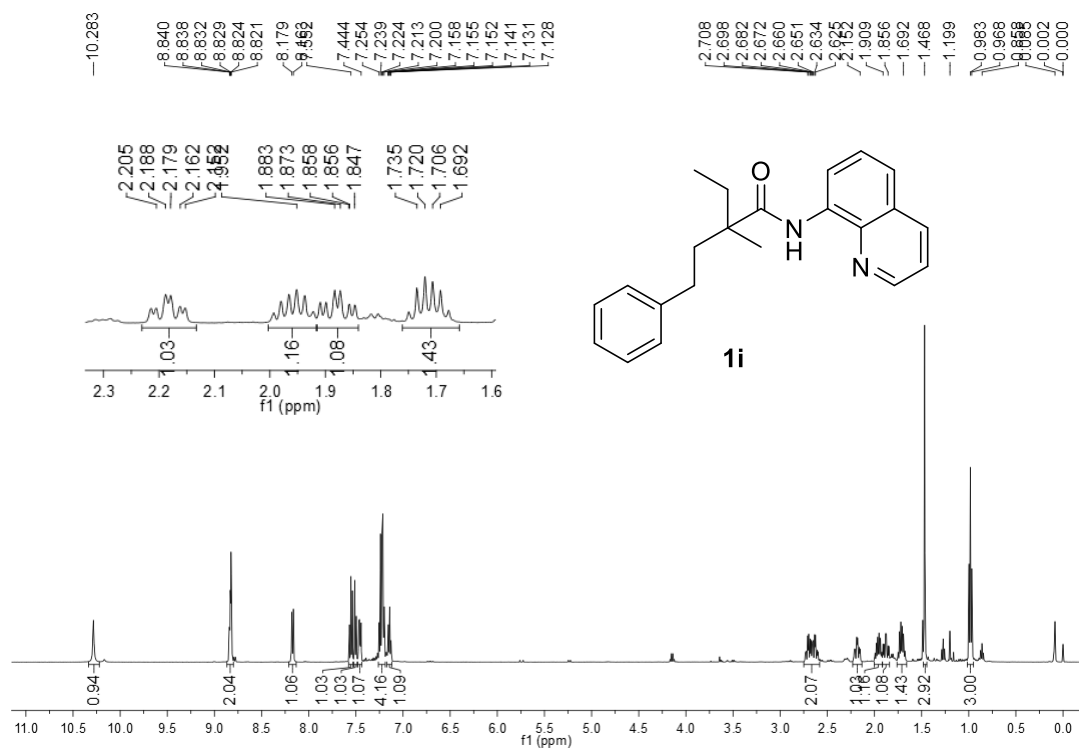

Figure S9. <sup>1</sup>H NMR Spectra of 1j

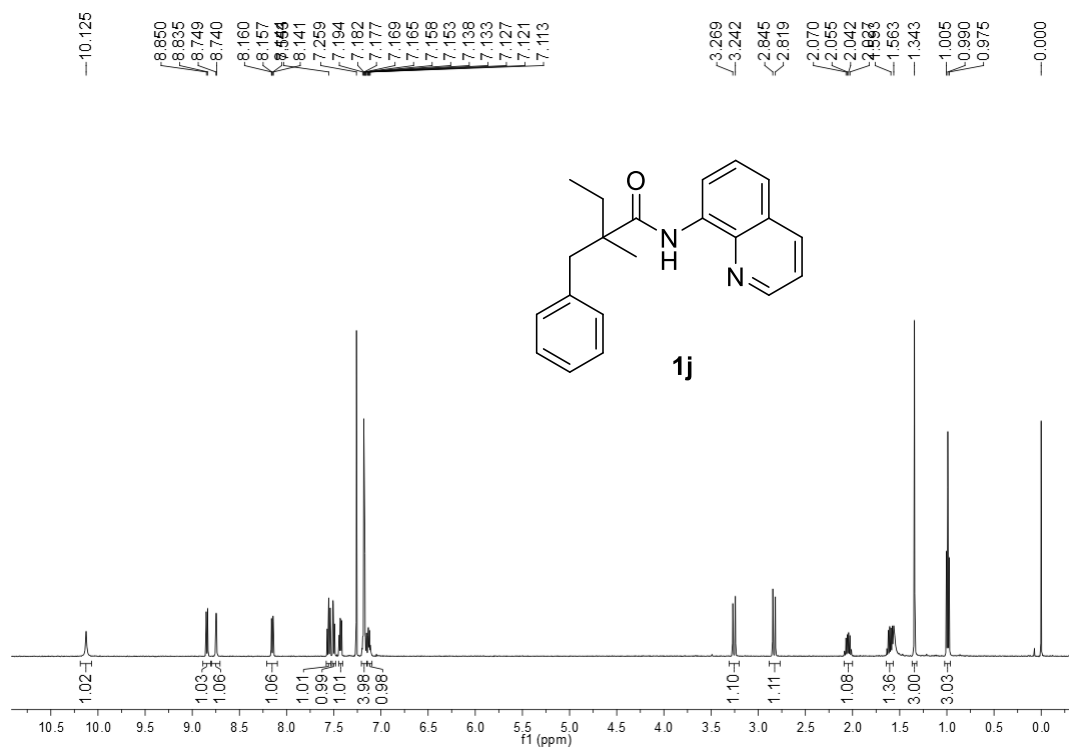

Figure S10. <sup>1</sup>H NMR Spectra of 1k

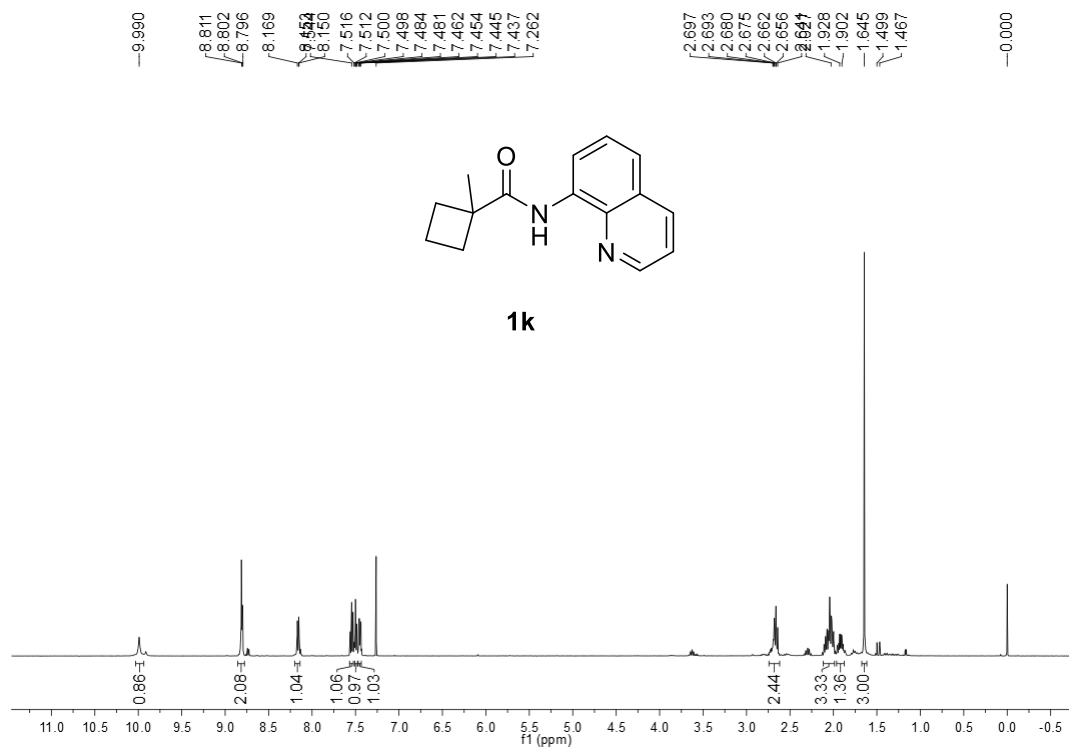

Figure S11. <sup>1</sup>H NMR Spectra of **1o**

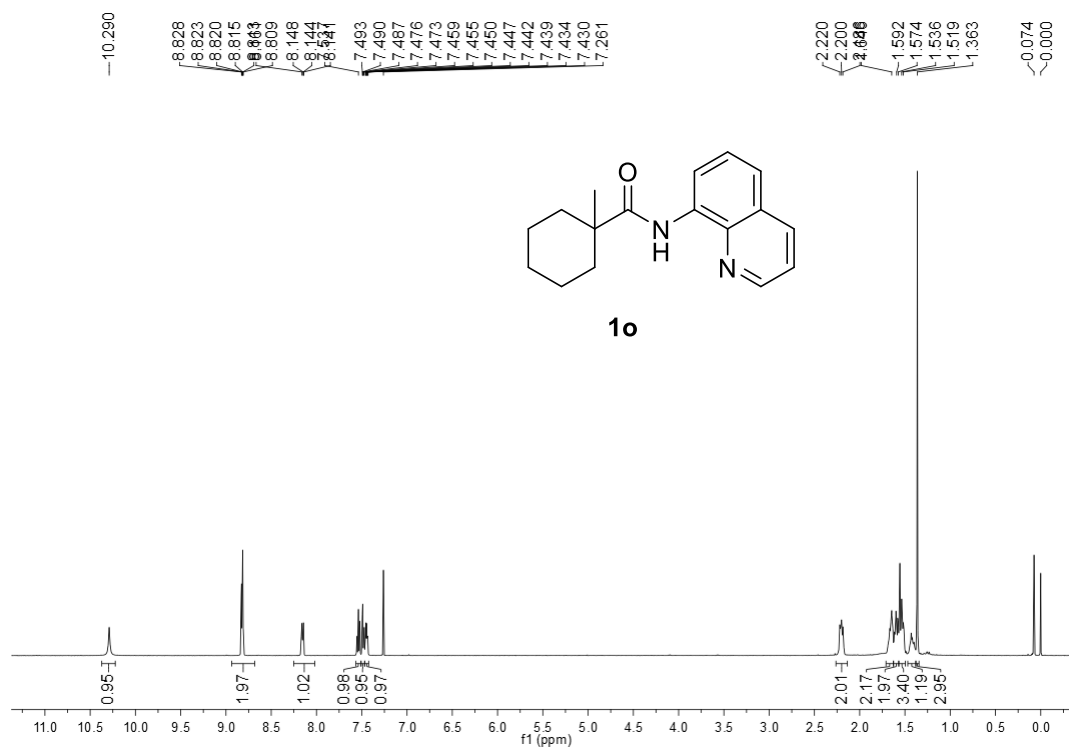

Figure S12. <sup>1</sup>H NMR Spectra of [D<sub>3</sub>]-**1l**

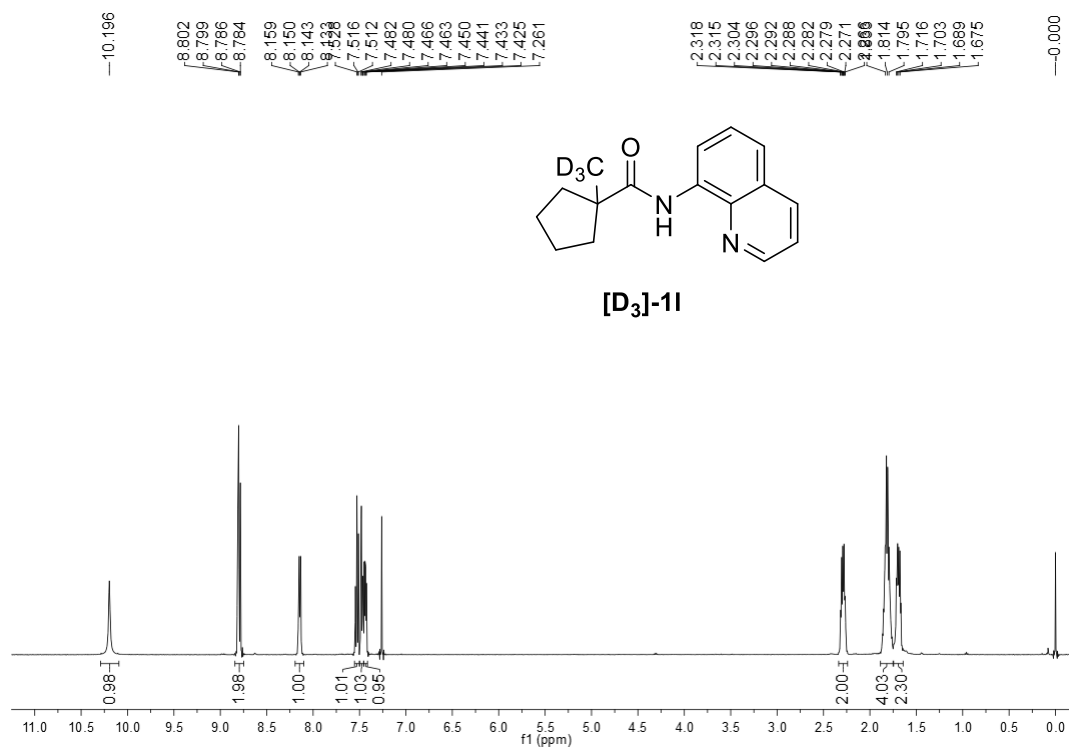

Figure S13. <sup>1</sup>H NMR Spectra of compound 3aa

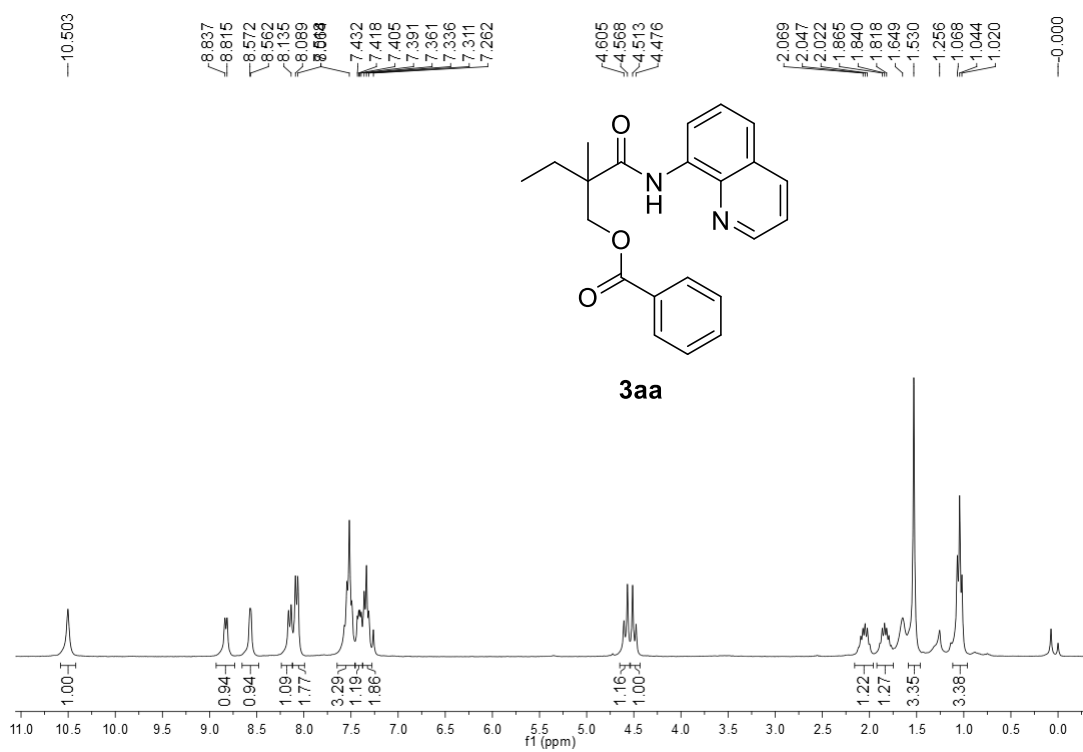

Figure S14. <sup>13</sup>C NMR Spectra of compound 3aa

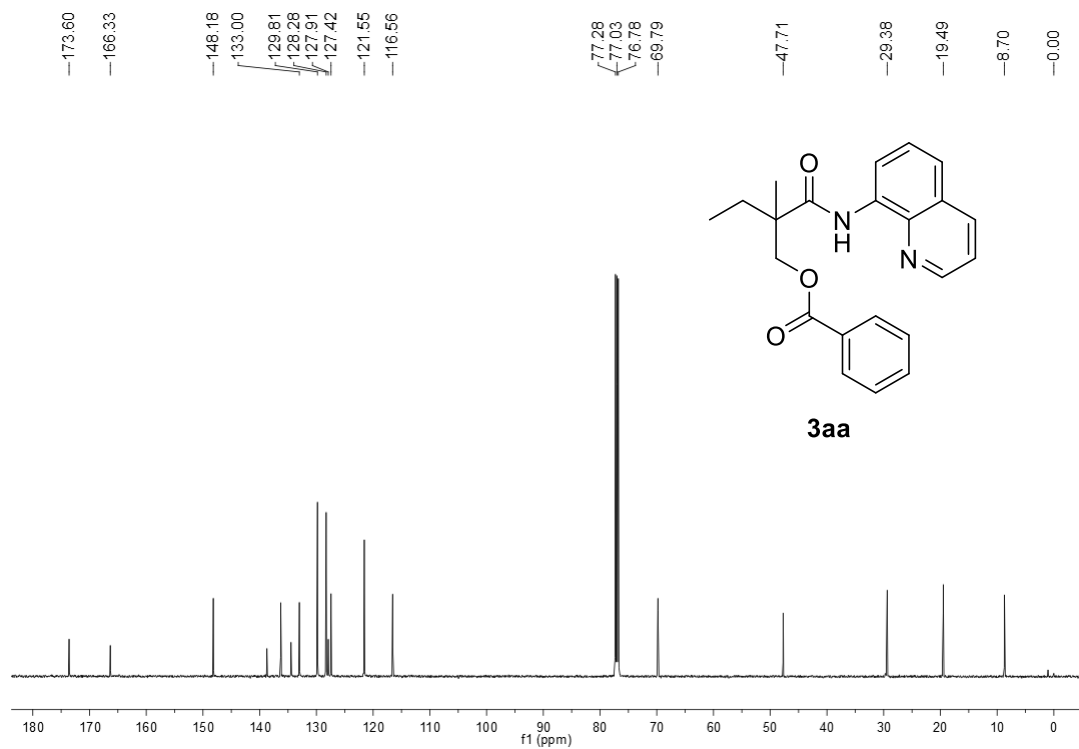

Figure S15. <sup>1</sup>H NMR Spectra of compound 3aa'

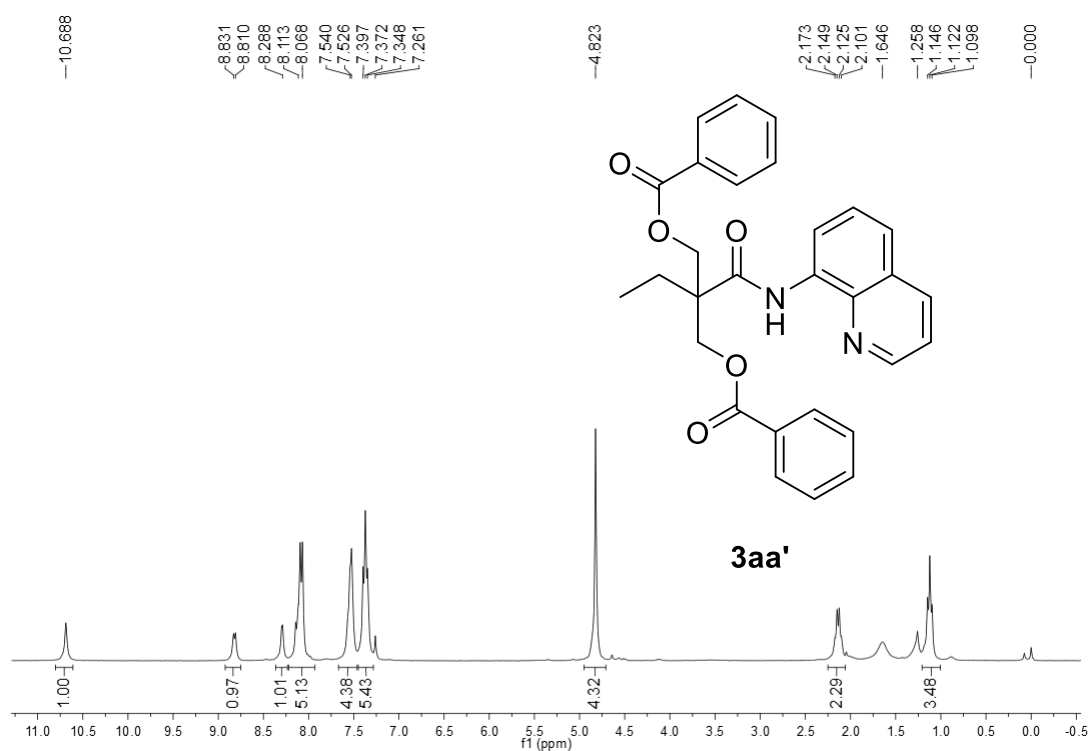

Figure S16. <sup>13</sup>C NMR Spectra of compound 3aa'

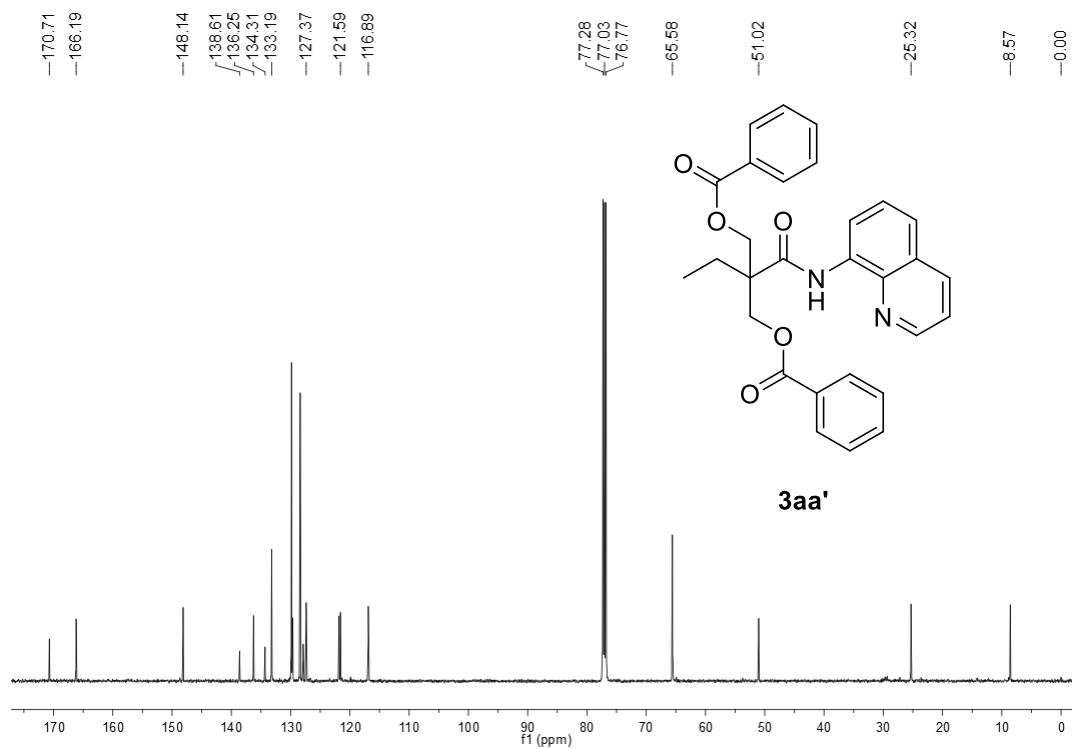

Figure S17. <sup>1</sup>H NMR Spectra of compound 4a

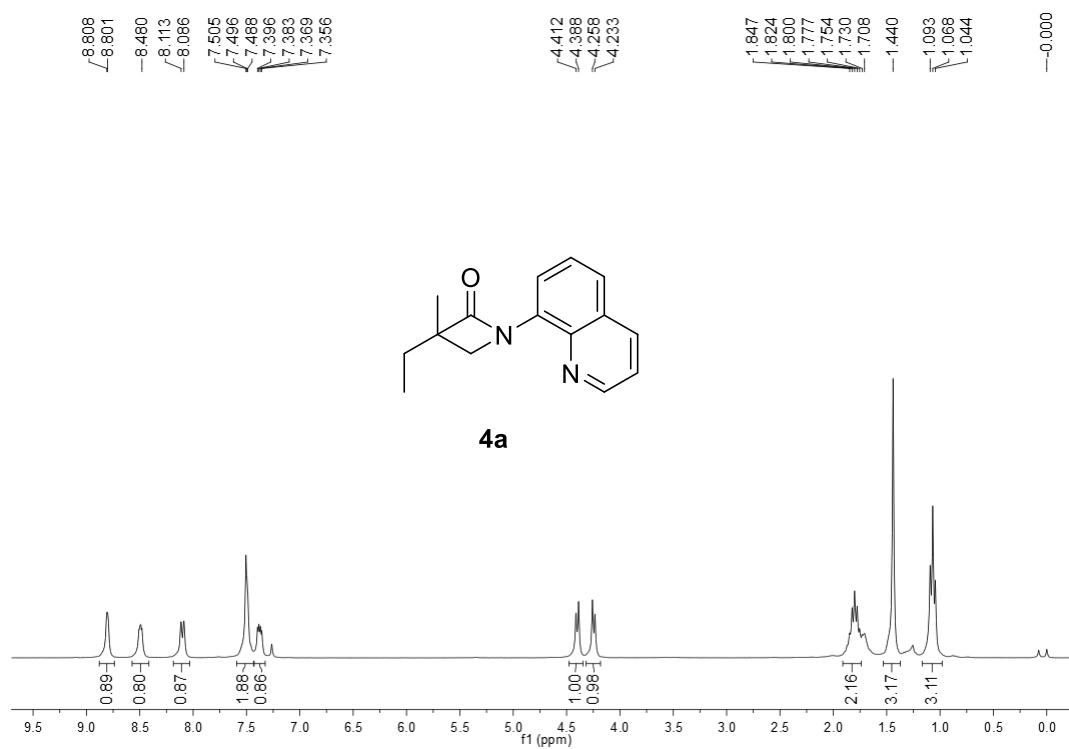

Figure S18. <sup>13</sup>C NMR Spectra of compound 4a

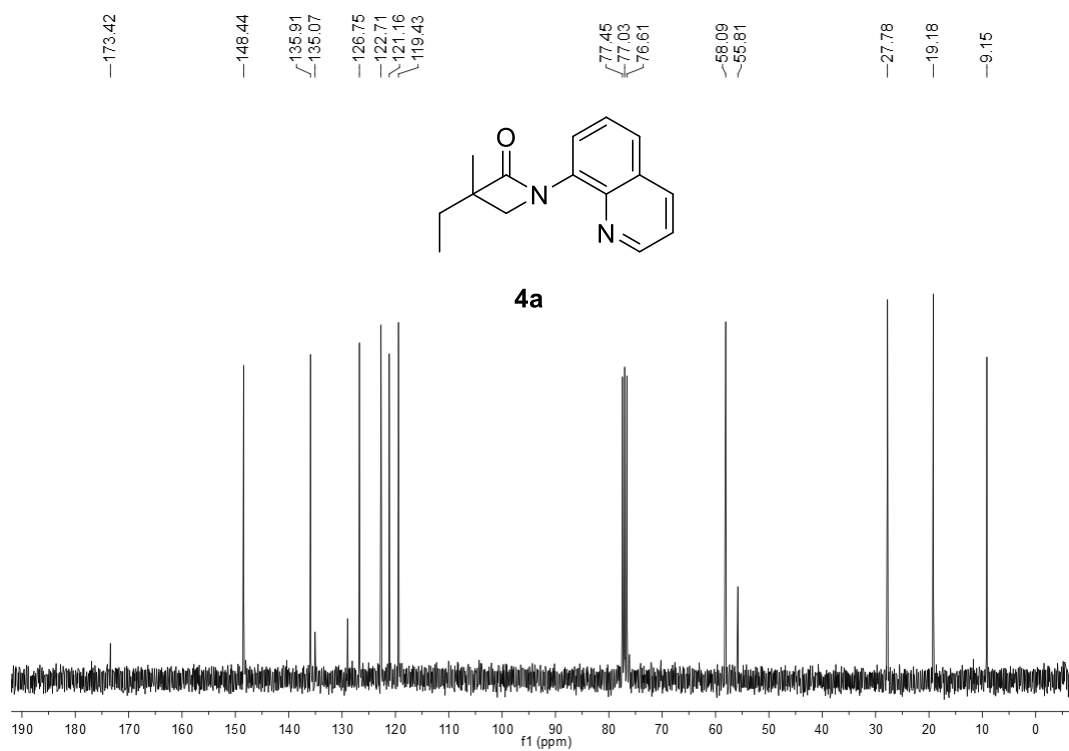

Figure S19. <sup>1</sup>H NMR Spectra of compound 3ab

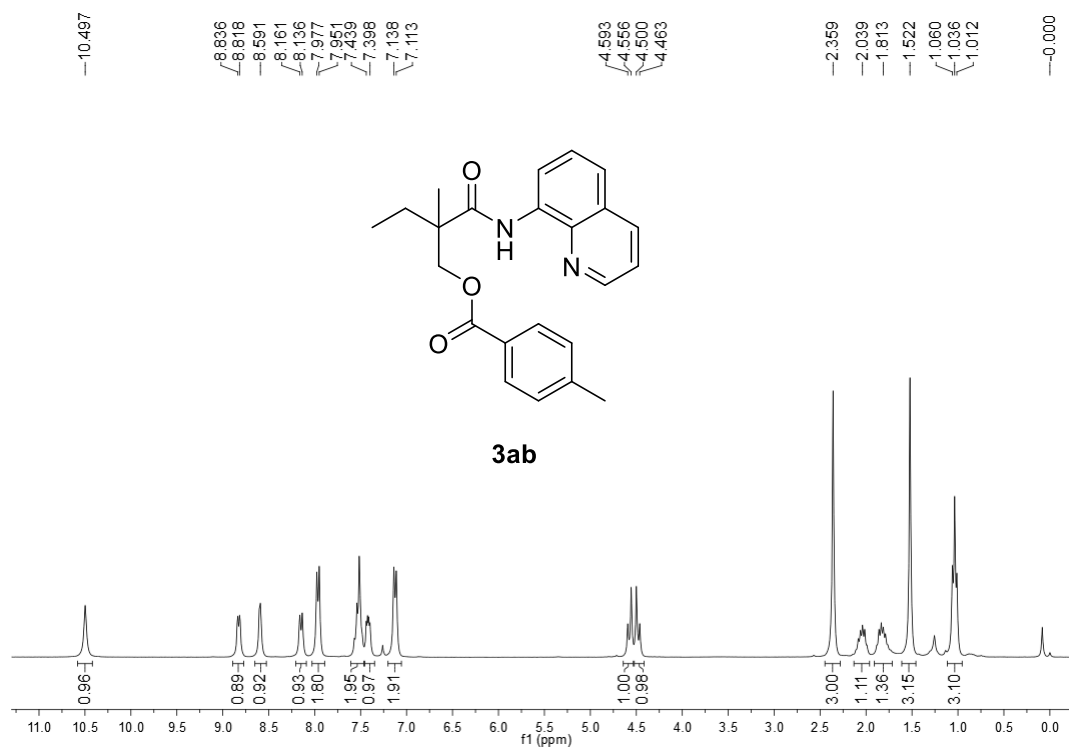

Figure S20. <sup>13</sup>C NMR Spectra of compound 3ab

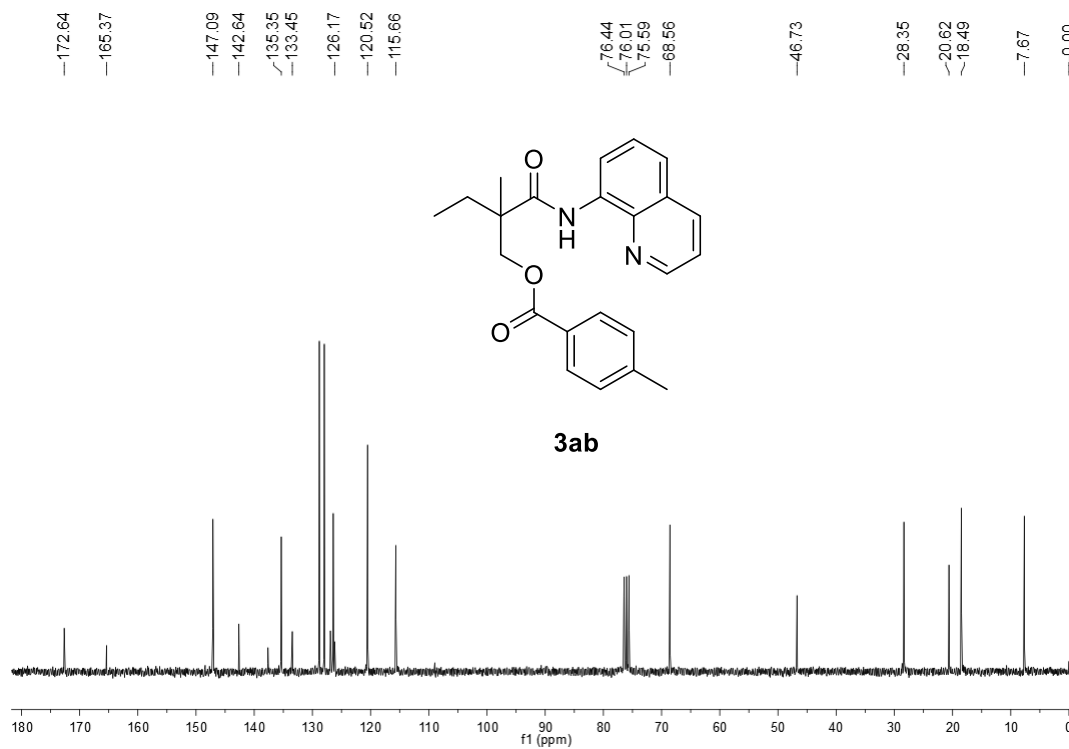



Figure S21. <sup>1</sup>H NMR Spectra of compound 3ab'

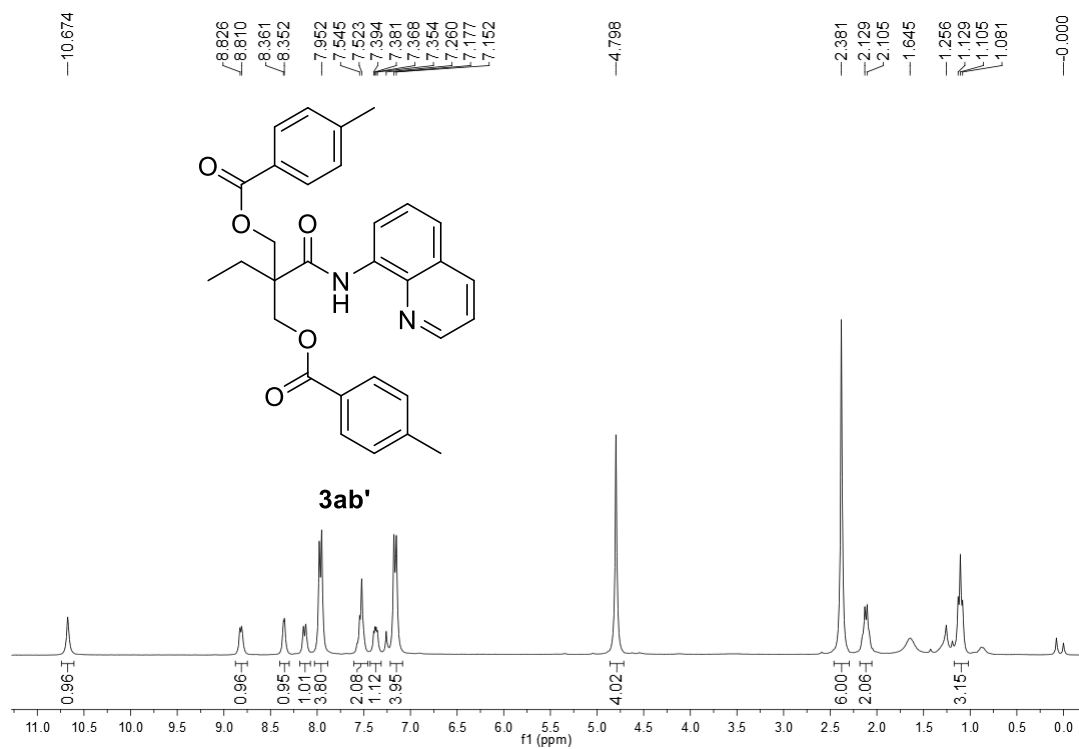

Figure S22. <sup>13</sup>C NMR Spectra of compound 3ab'

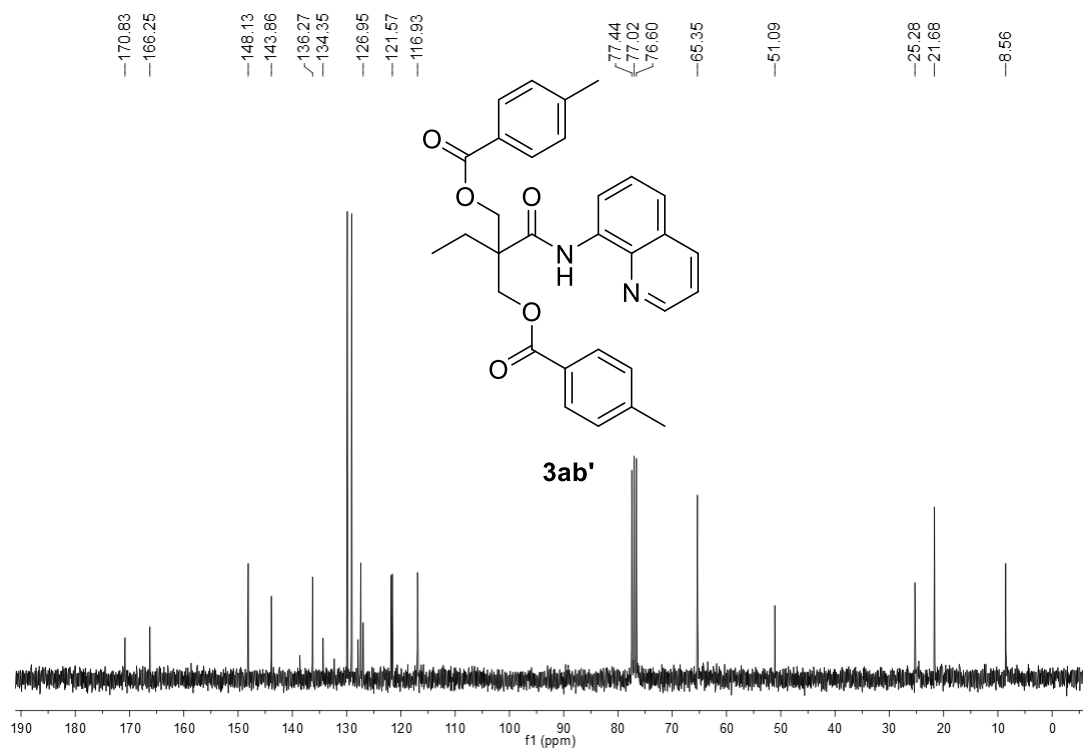

Figure S23. <sup>1</sup>H NMR Spectra of compound 3ac

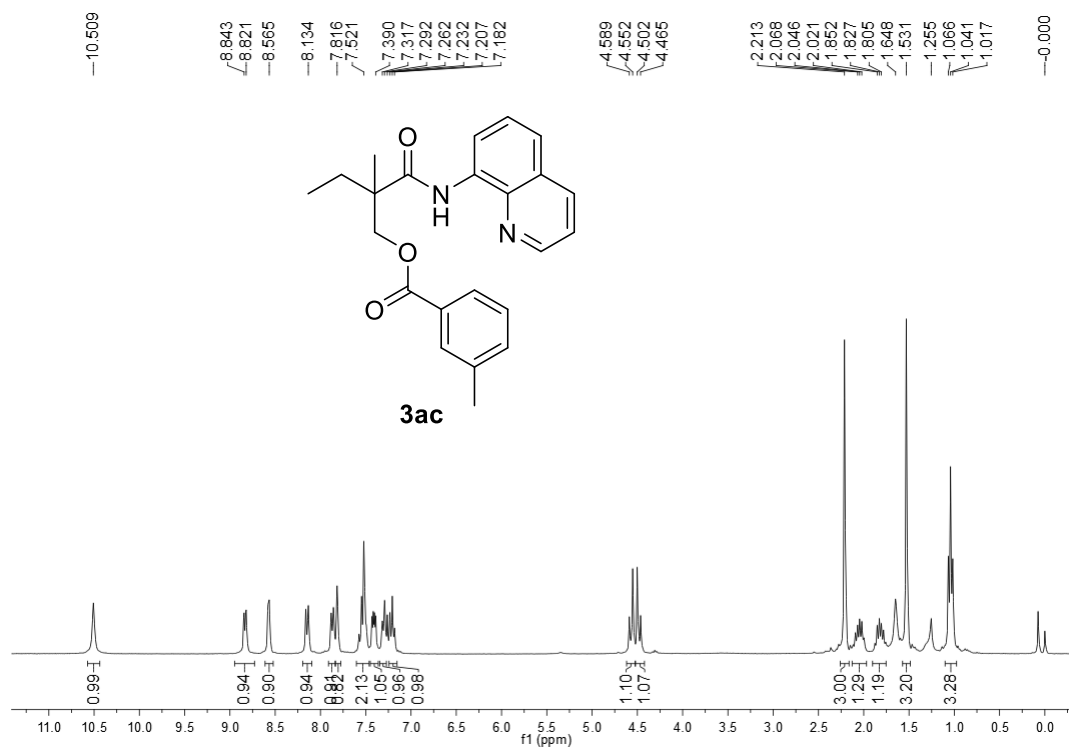

Figure S24. <sup>13</sup>C NMR Spectra of compound 3ac

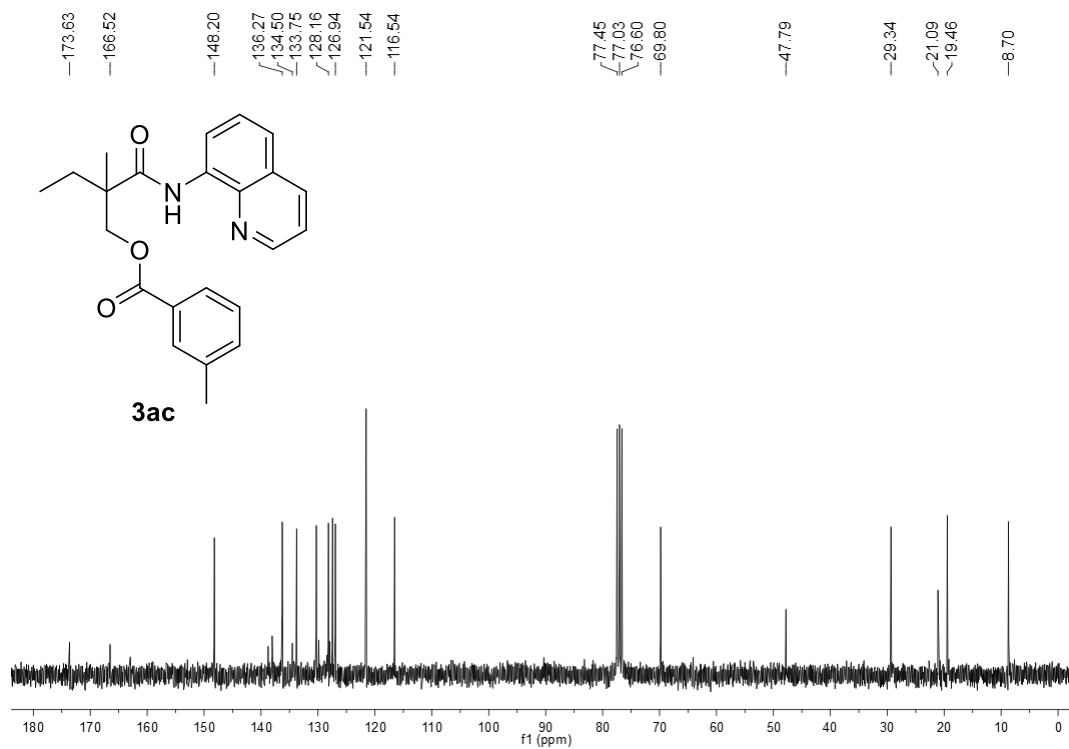

Figure S25. <sup>1</sup>H NMR Spectra of compound 3ac'

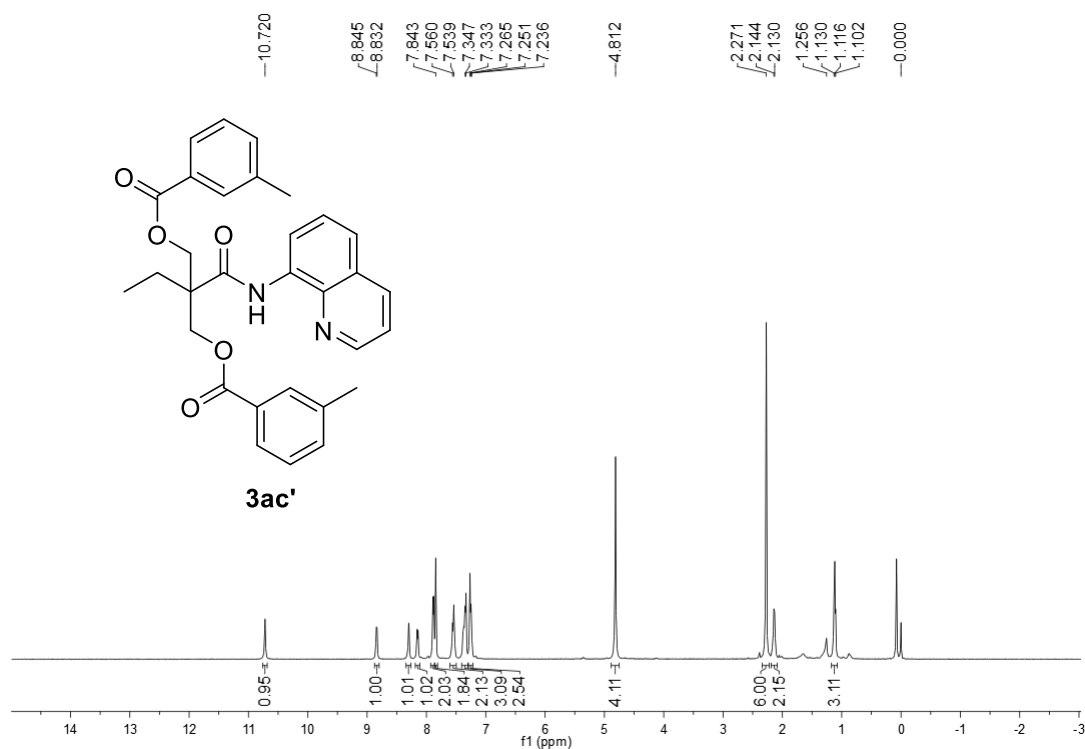

Figure S26. <sup>13</sup>C NMR Spectra of compound 3ac'

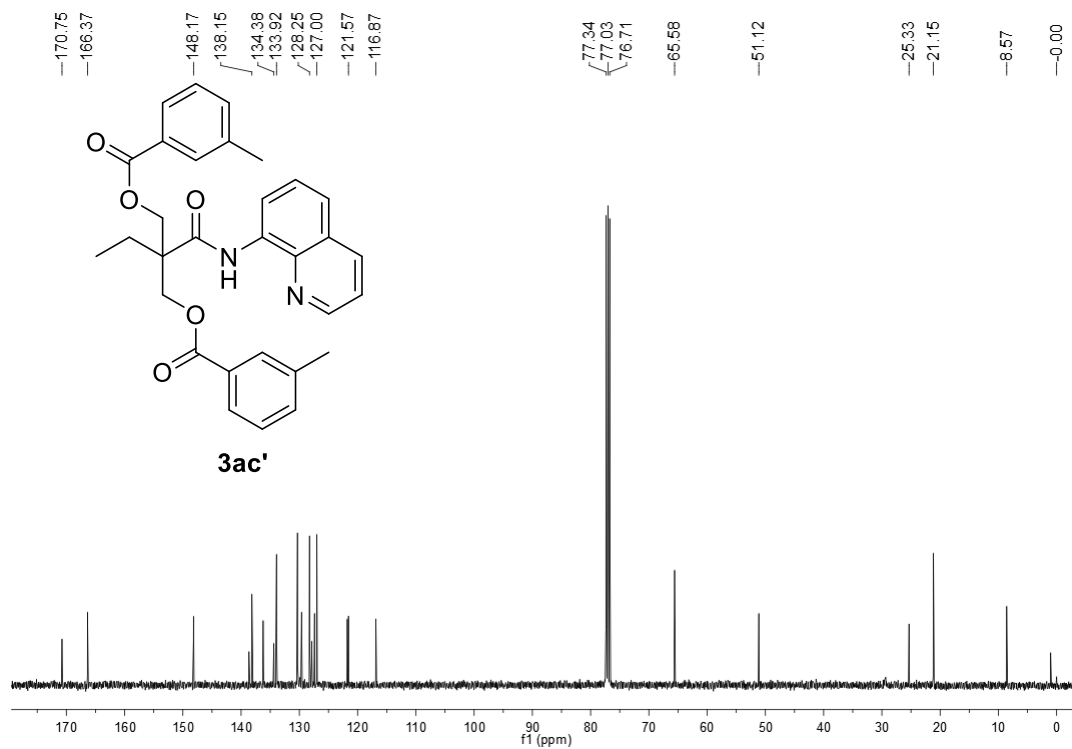

Figure S27. <sup>1</sup>H NMR Spectra of compound 3ad

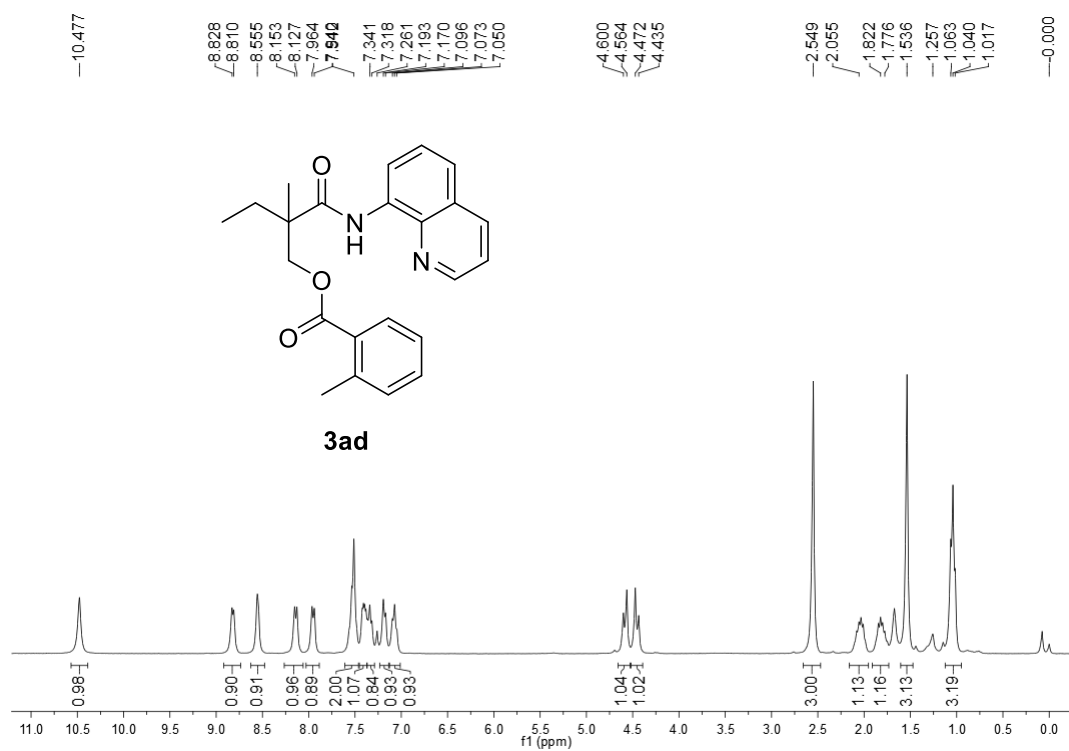

Figure S28. <sup>13</sup>C NMR Spectra of compound 3ad

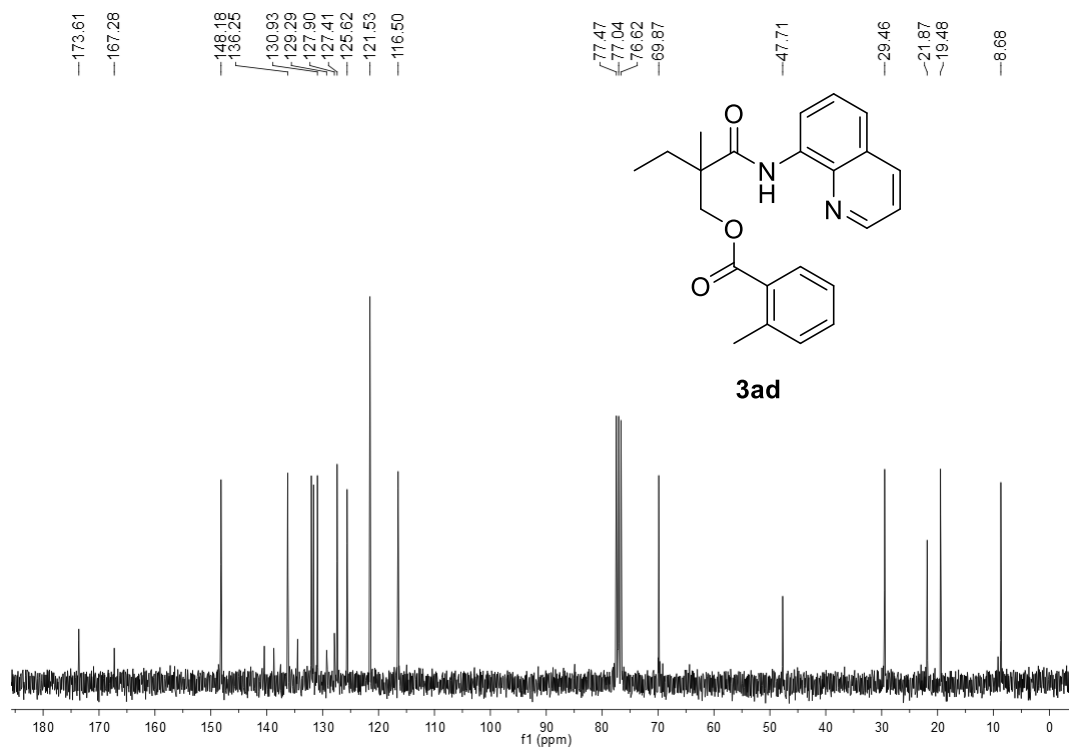

Figure S29. <sup>1</sup>H NMR Spectra of compound 3ad'

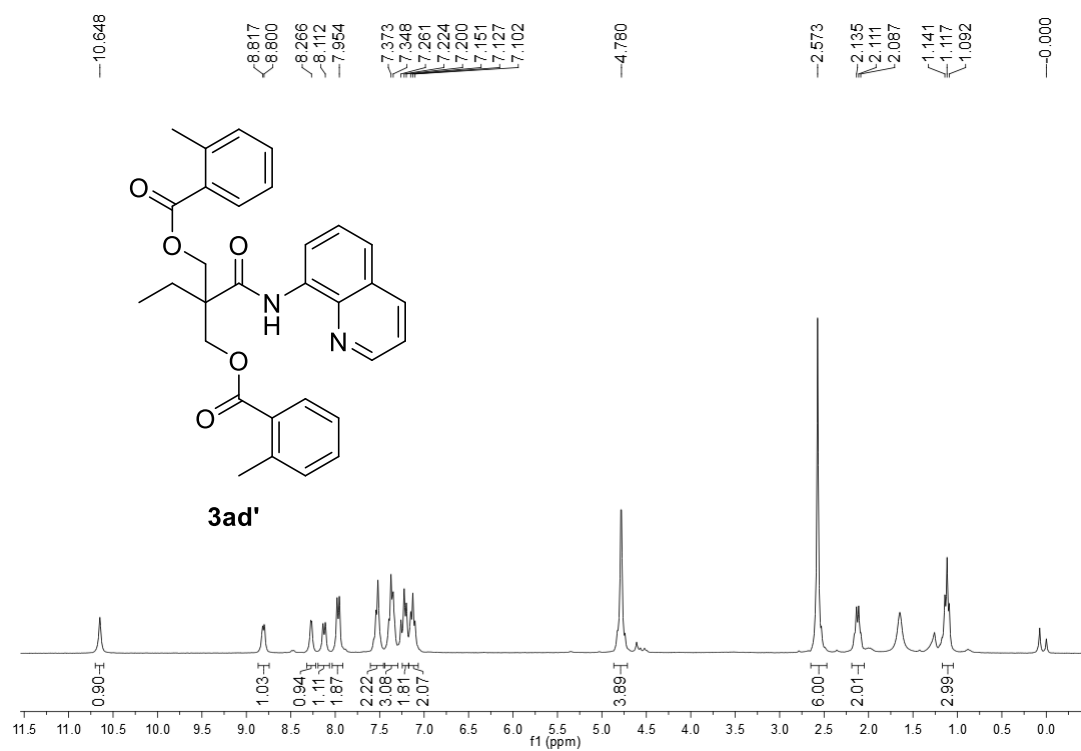

Figure S30. <sup>13</sup>C NMR Spectra of compound 3ad'

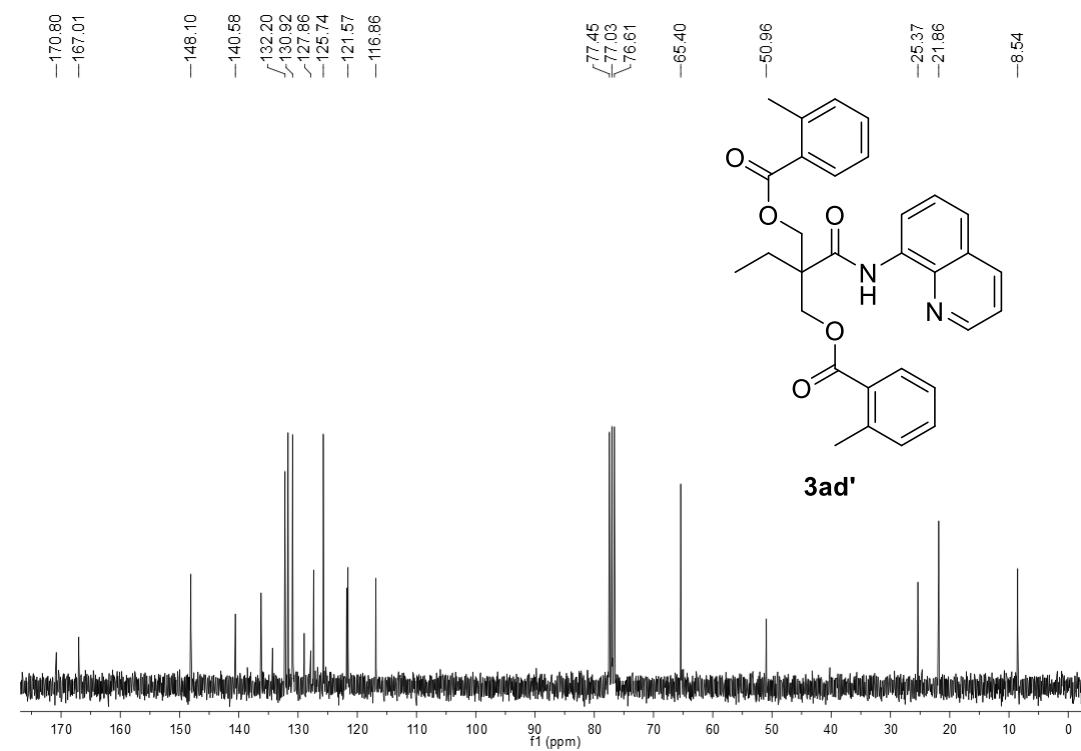

Figure S31. <sup>1</sup>H NMR Spectra of compound 3ae

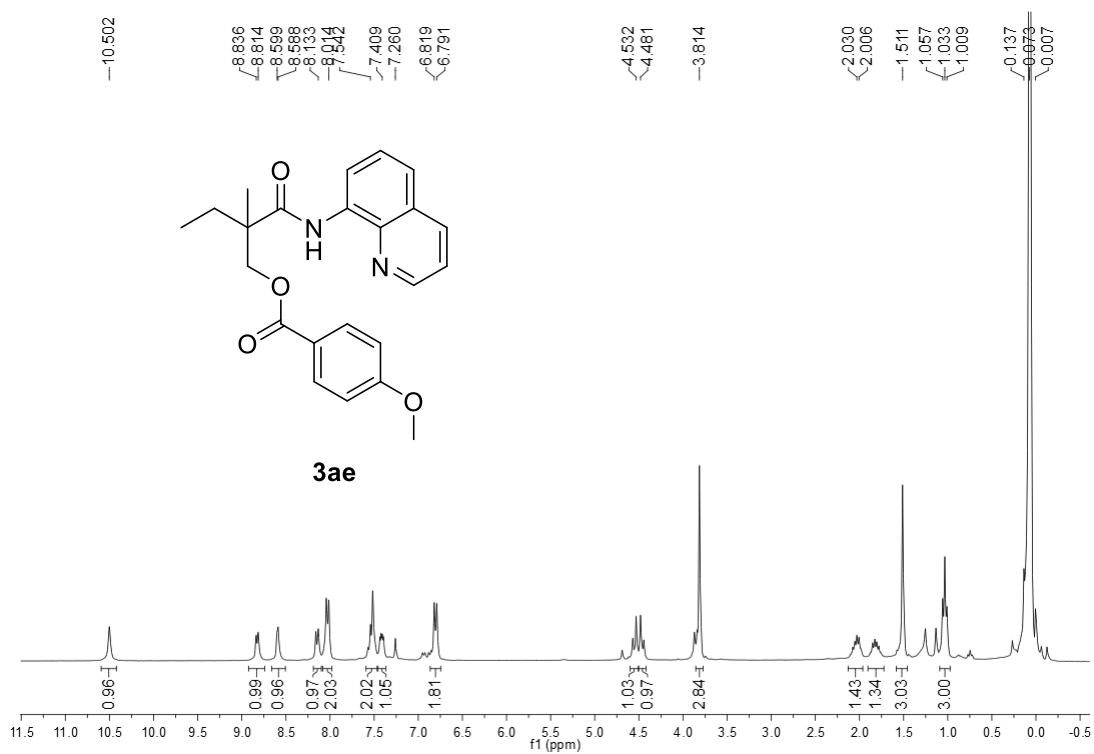

Figure S32. <sup>13</sup>C NMR Spectra of compound 3ae

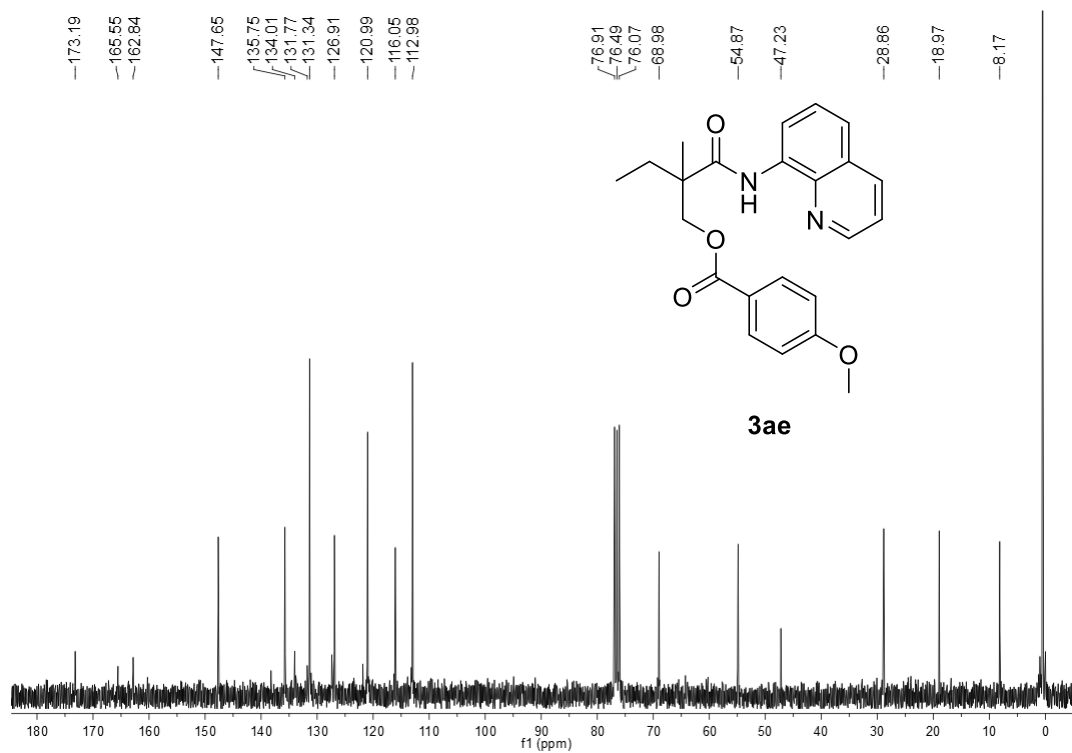

Figure S33.  $^1\text{H}$  NMR Spectra of compound 3ae'

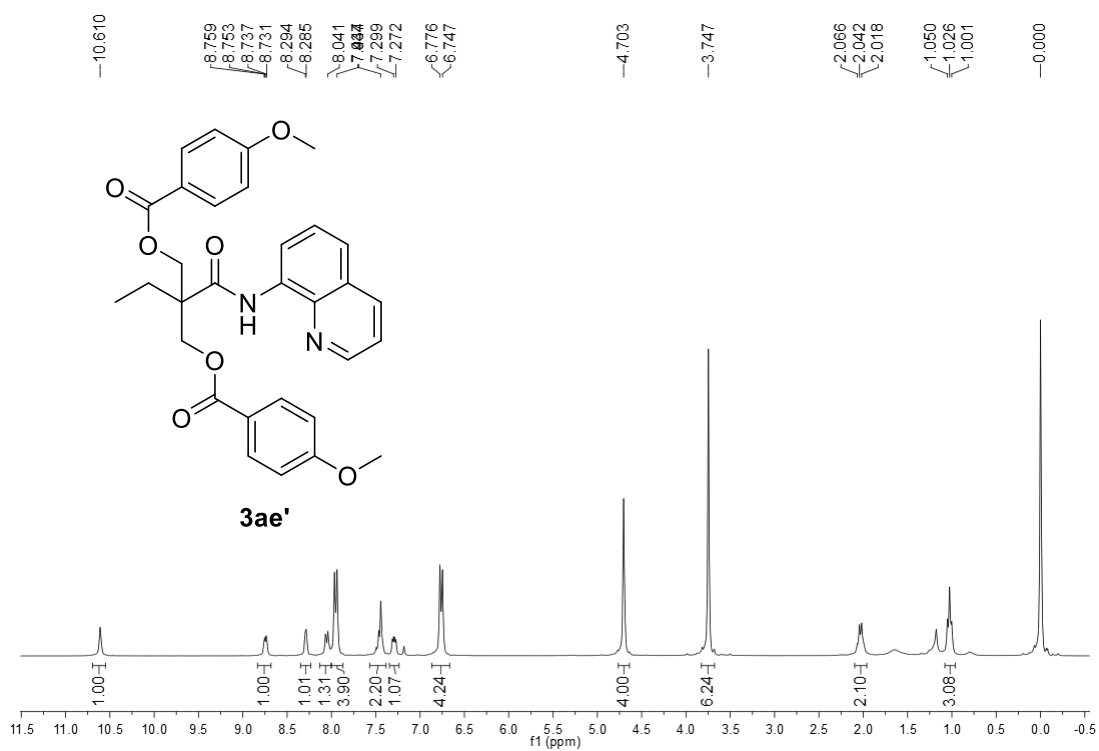

Figure S34.  $^{13}\text{C}$  NMR Spectra of compound 3ae'

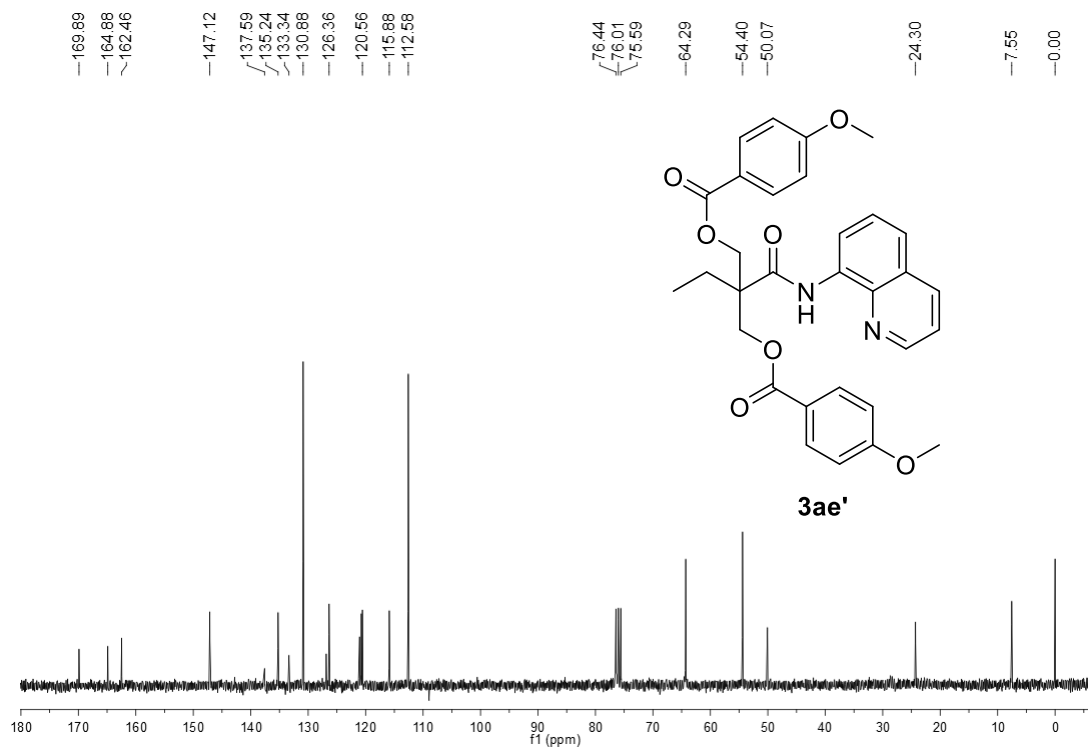

Figure S35. <sup>1</sup>H NMR Spectra of compound 3af

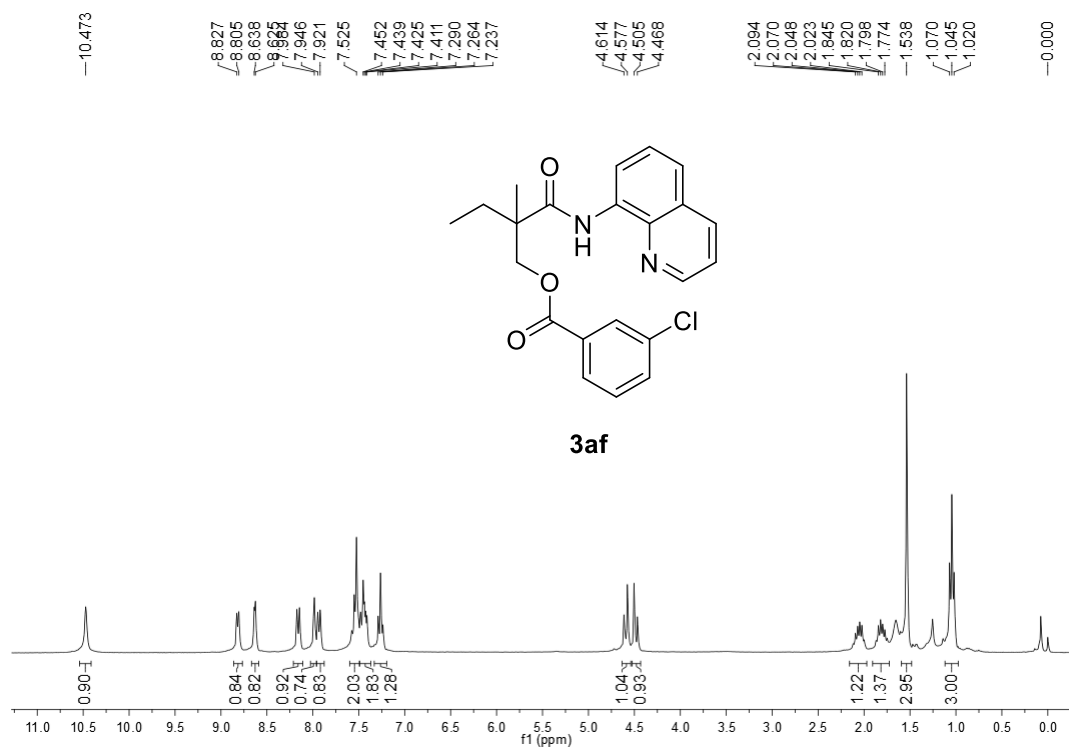

Figure S36. <sup>13</sup>C NMR Spectra of compound 3af

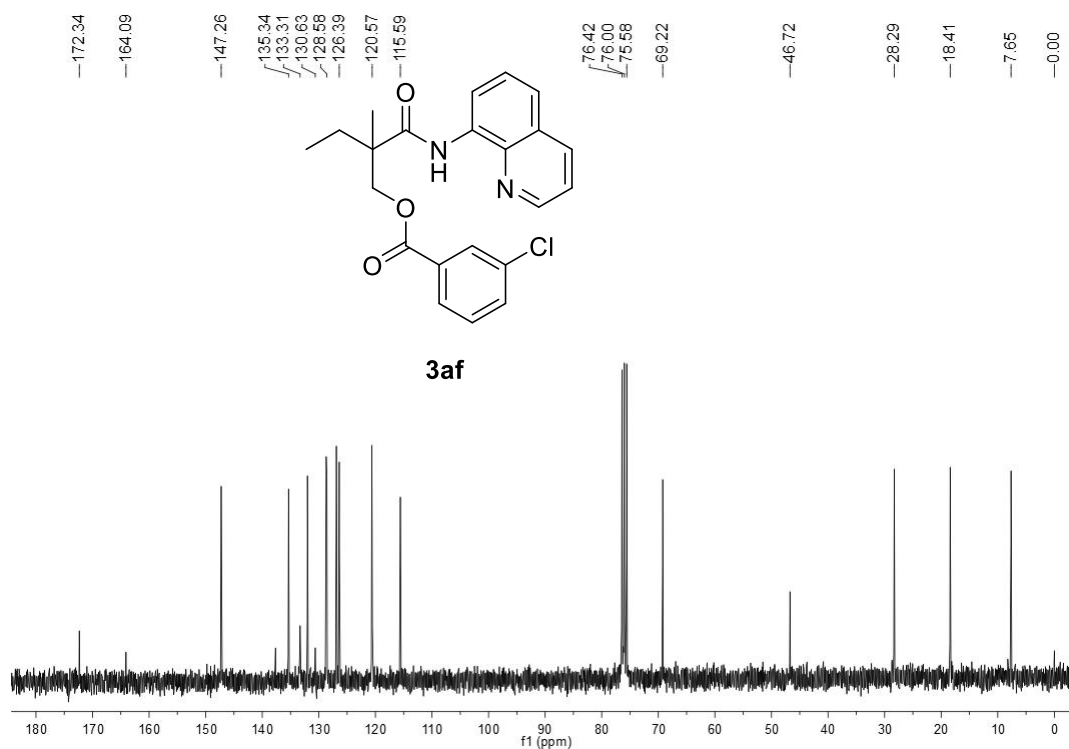



Figure S37. <sup>1</sup>H NMR Spectra of compound 3af'

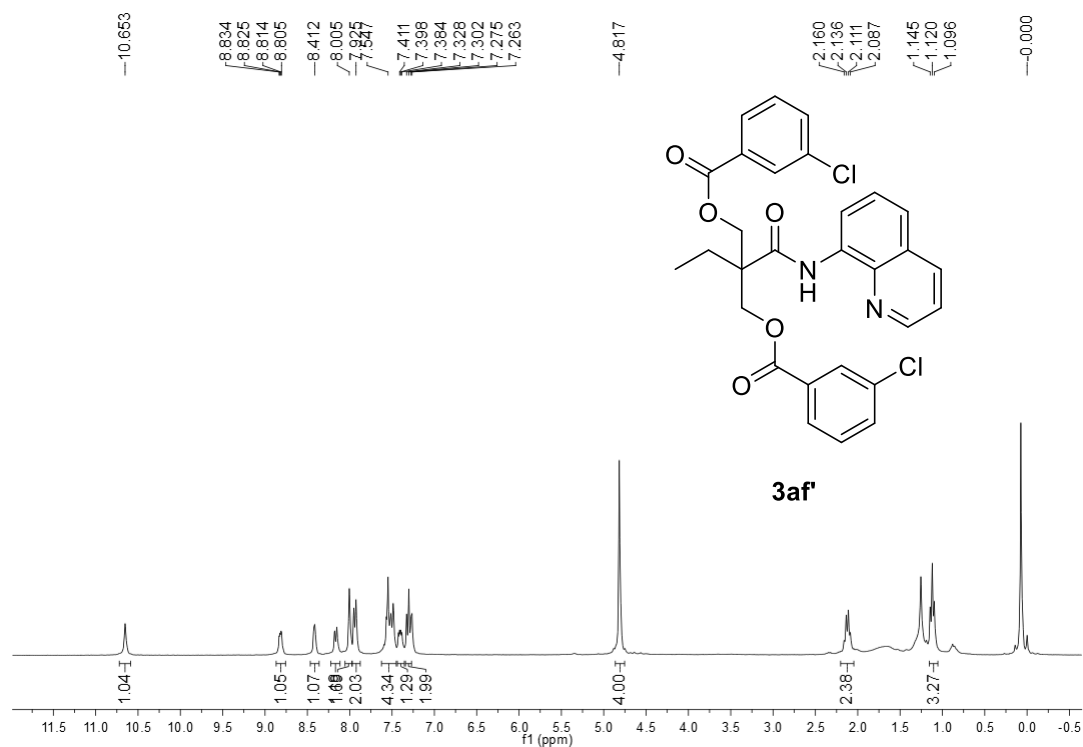

Figure S38. <sup>13</sup>C NMR Spectra of compound 3af'

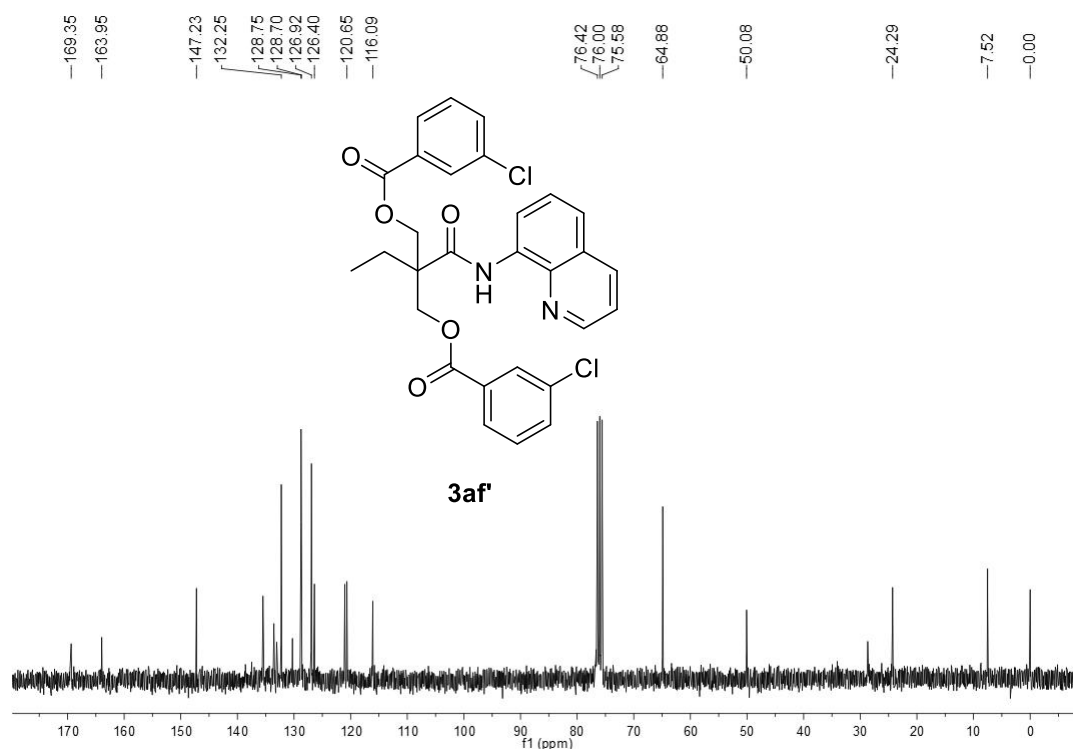

Figure S39. <sup>1</sup>H NMR Spectra of compound 3ag

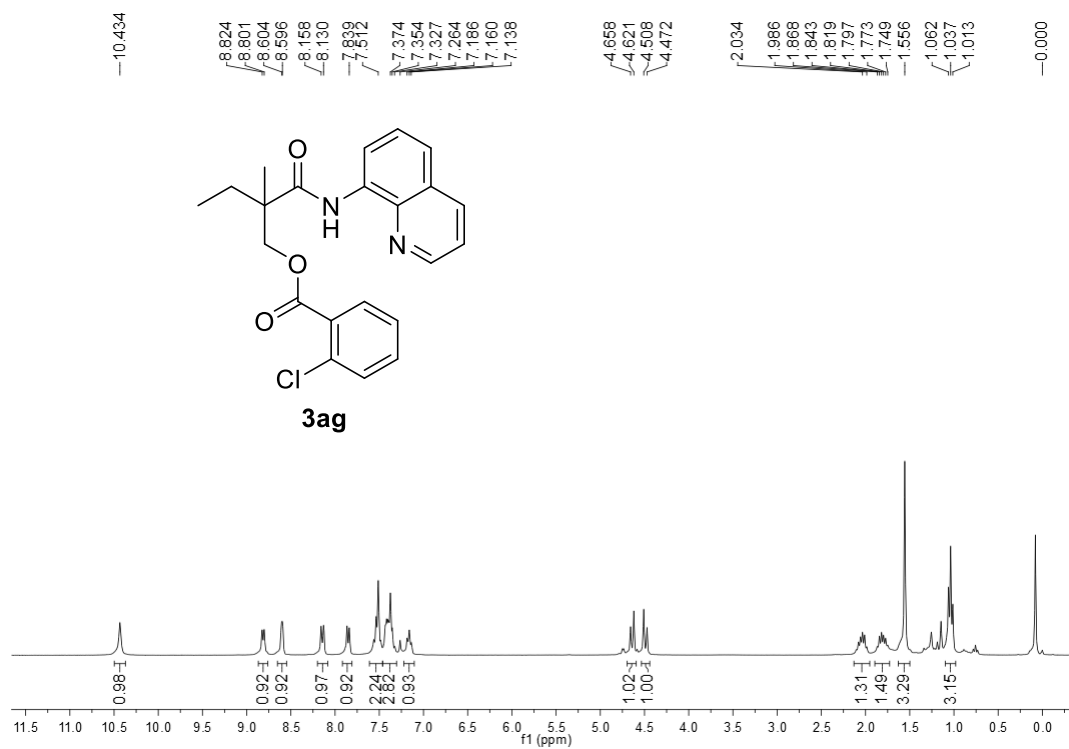

Figure S40. <sup>13</sup>C NMR Spectra of compound 3ag

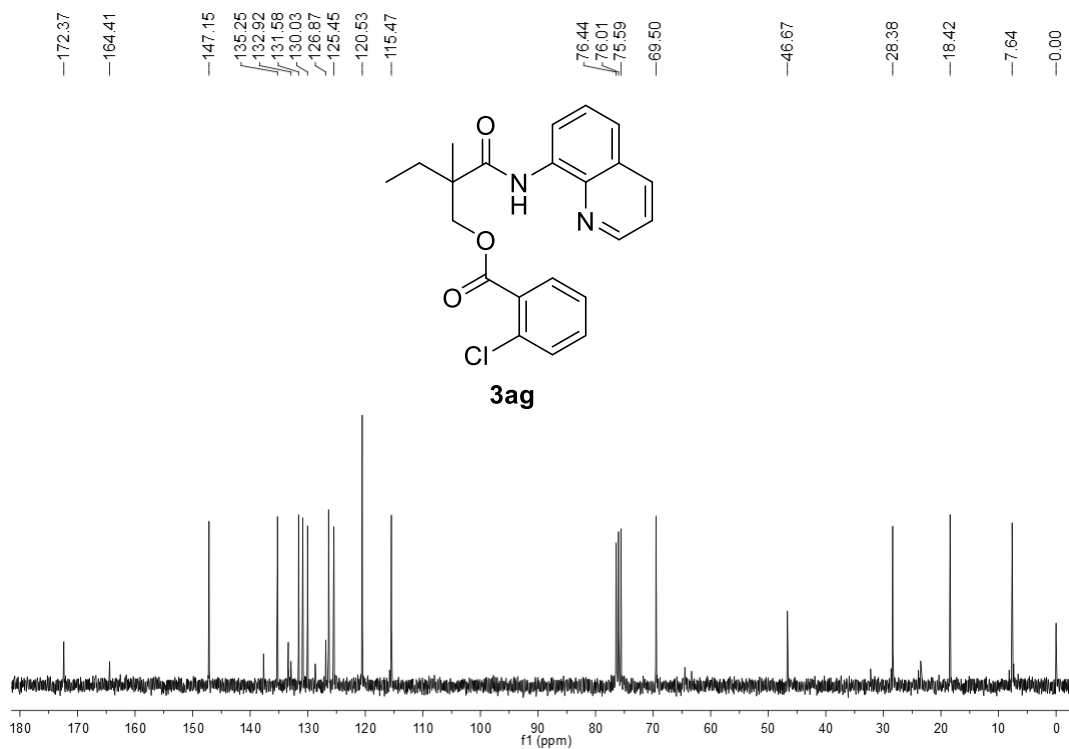

Figure S41. <sup>1</sup>H NMR Spectra of compound 3ag'

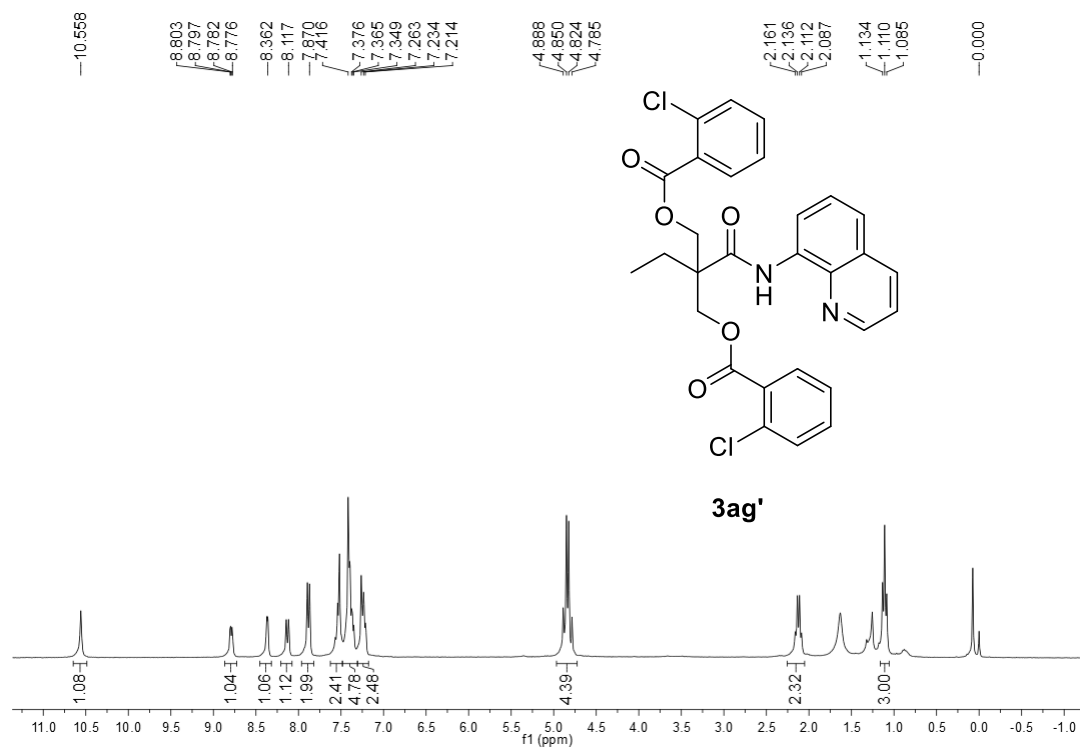

Figure S42. <sup>13</sup>C NMR Spectra of compound 3ag'

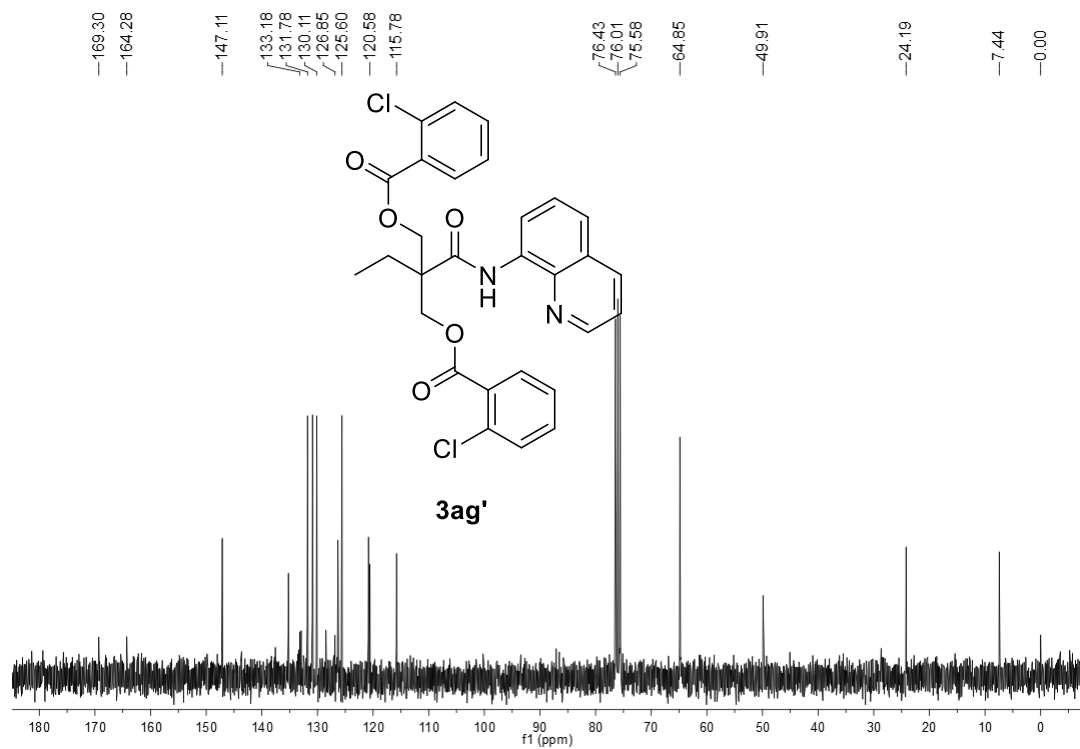

Figure S43. <sup>1</sup>H NMR Spectra of compound 3ah

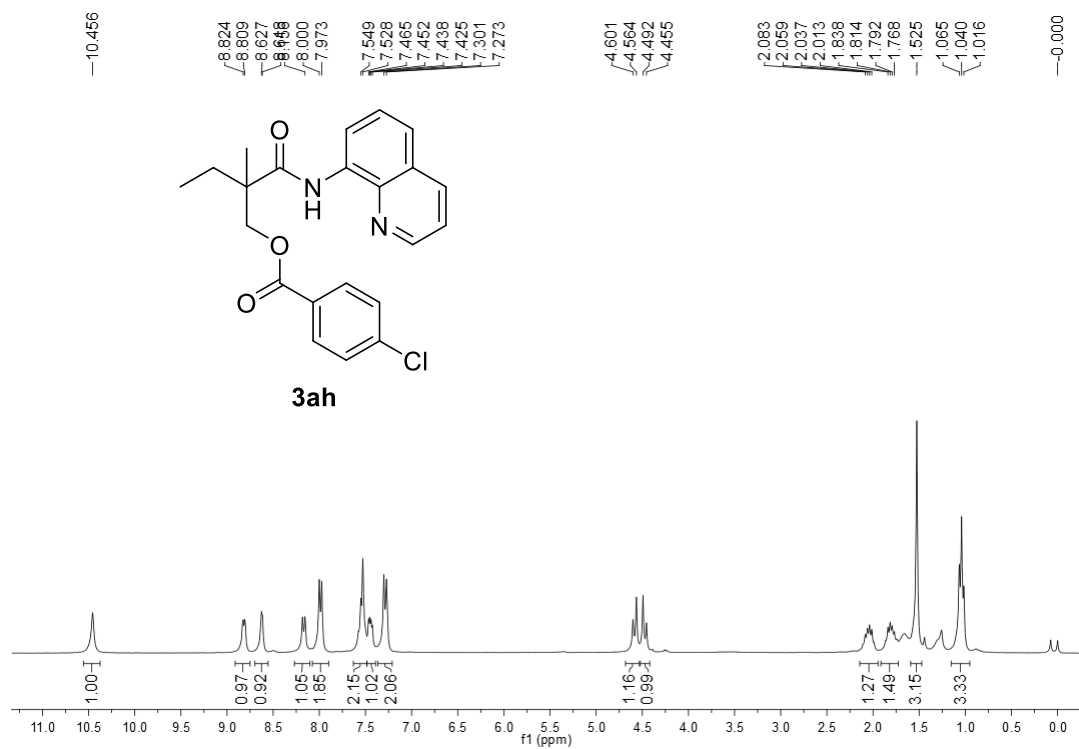

Figure S44. <sup>13</sup>C NMR Spectra of compound 3ah

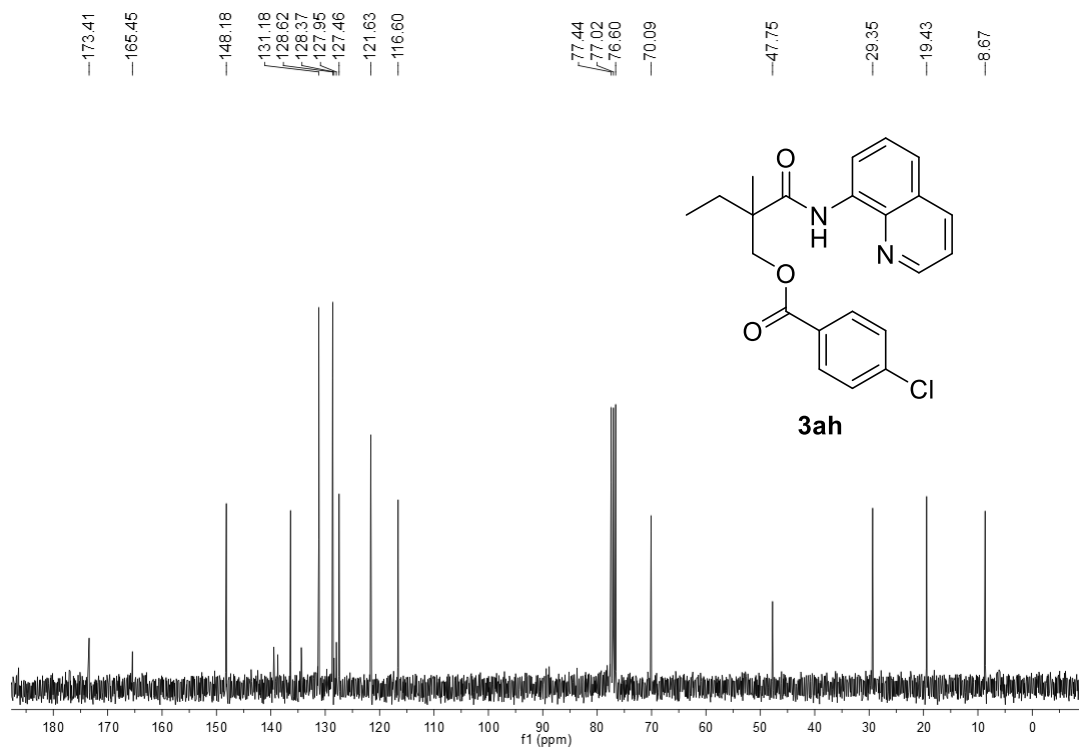

Figure S45.  $^1\text{H}$  NMR Spectra of compound 3ah'

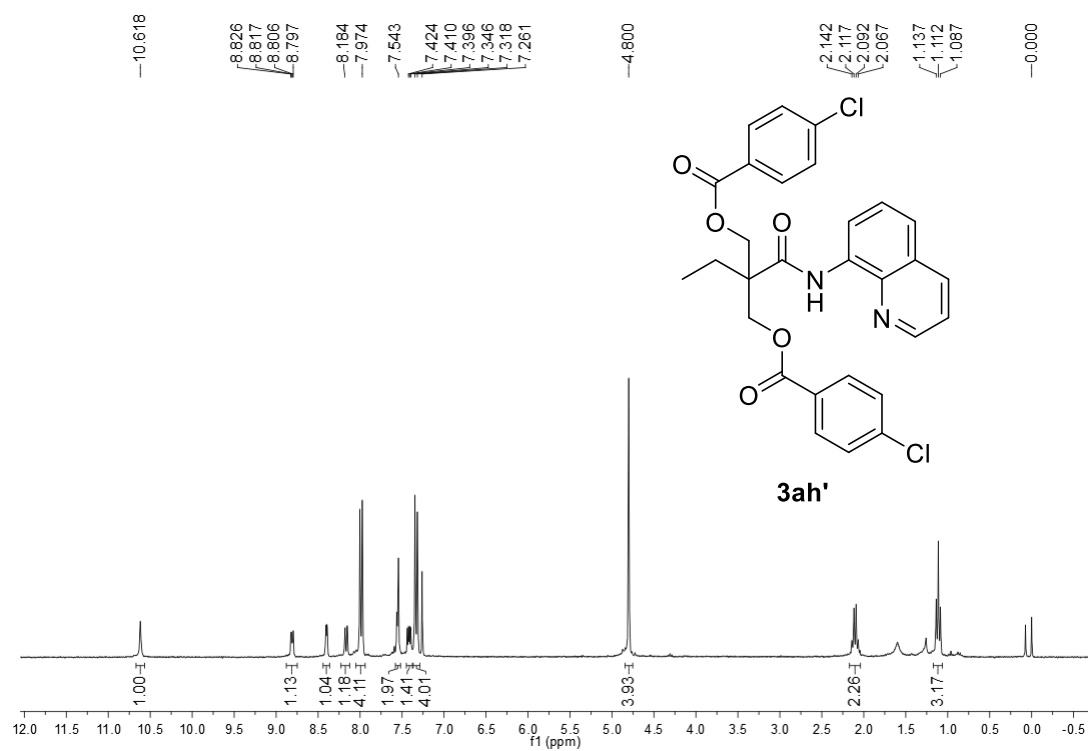

Figure S46.  $^{13}\text{C}$  NMR Spectra of compound 3ah'

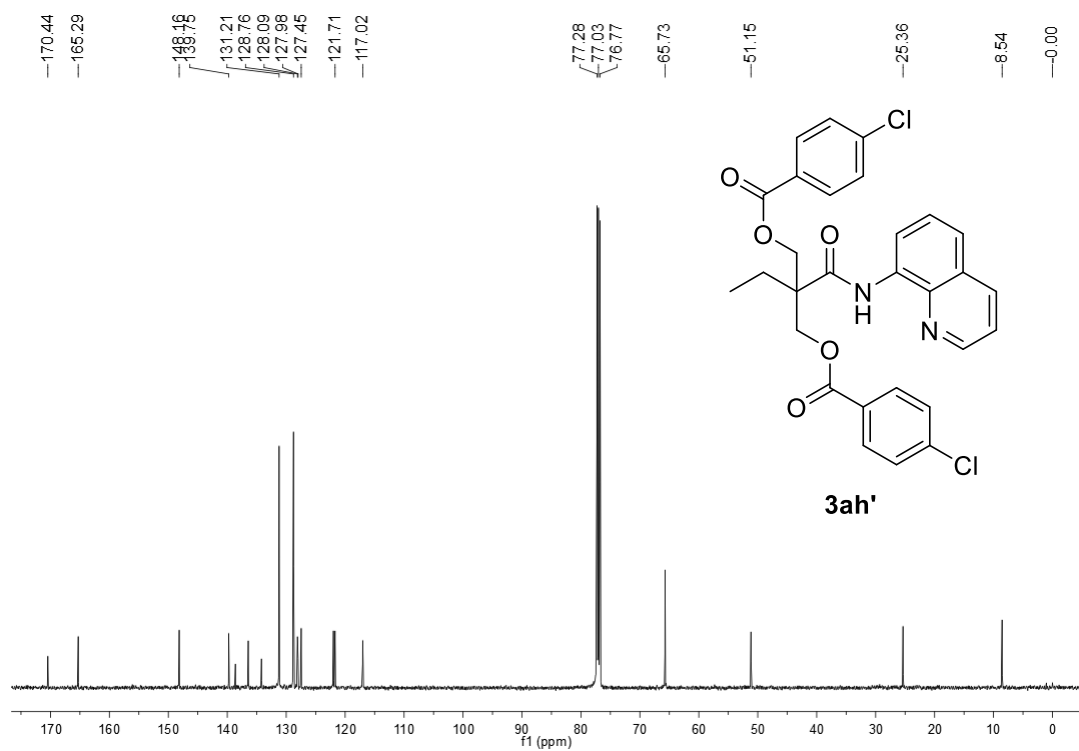

Figure S47. <sup>1</sup>H NMR Spectra of compound 3ai

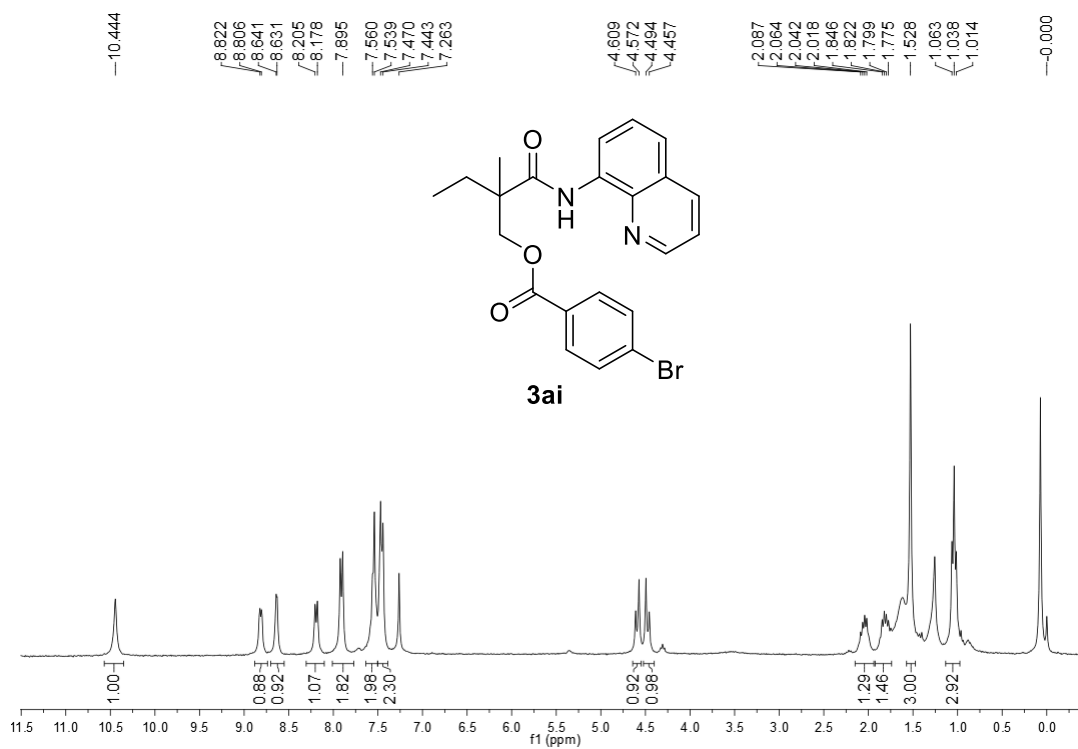

Figure S48. <sup>13</sup>C NMR Spectra of compound 3ai

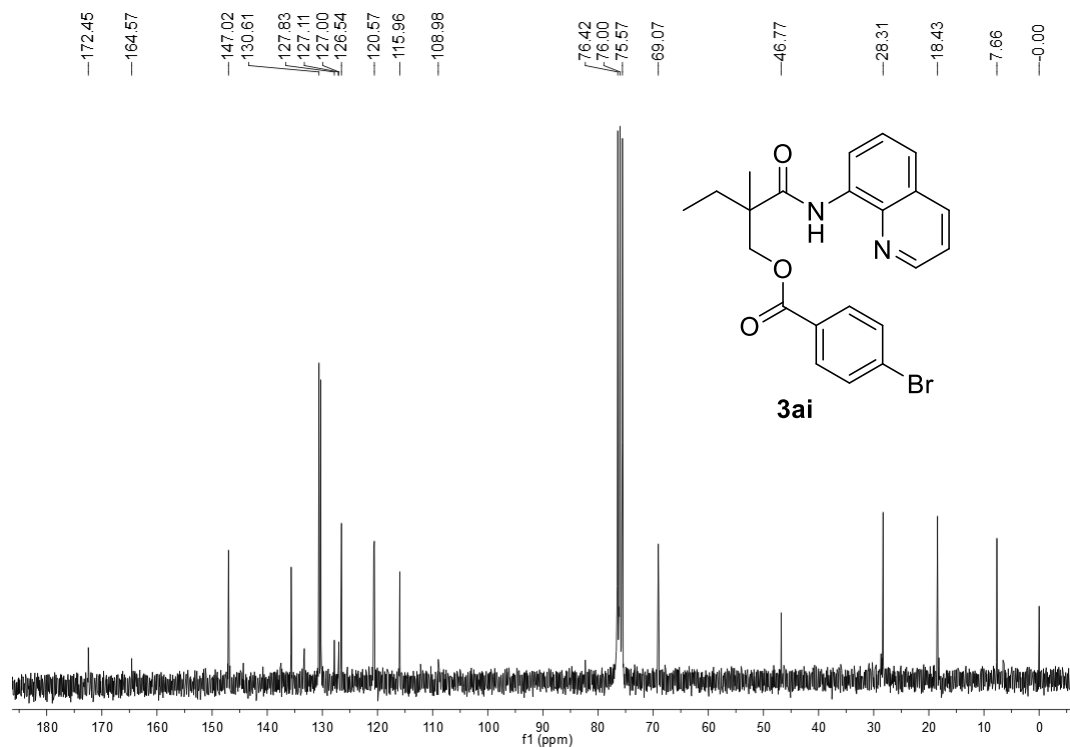

Figure S49. <sup>1</sup>H NMR Spectra of compound 3ai'

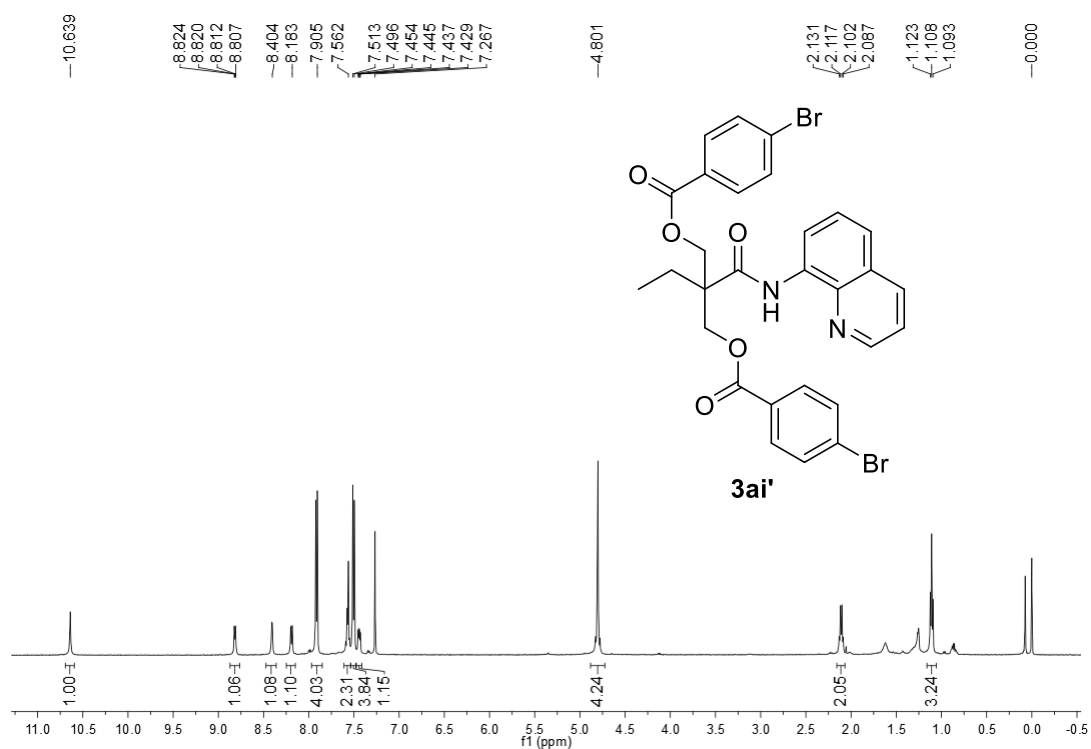

Figure S50. <sup>13</sup>C NMR Spectra of compound 3ai'

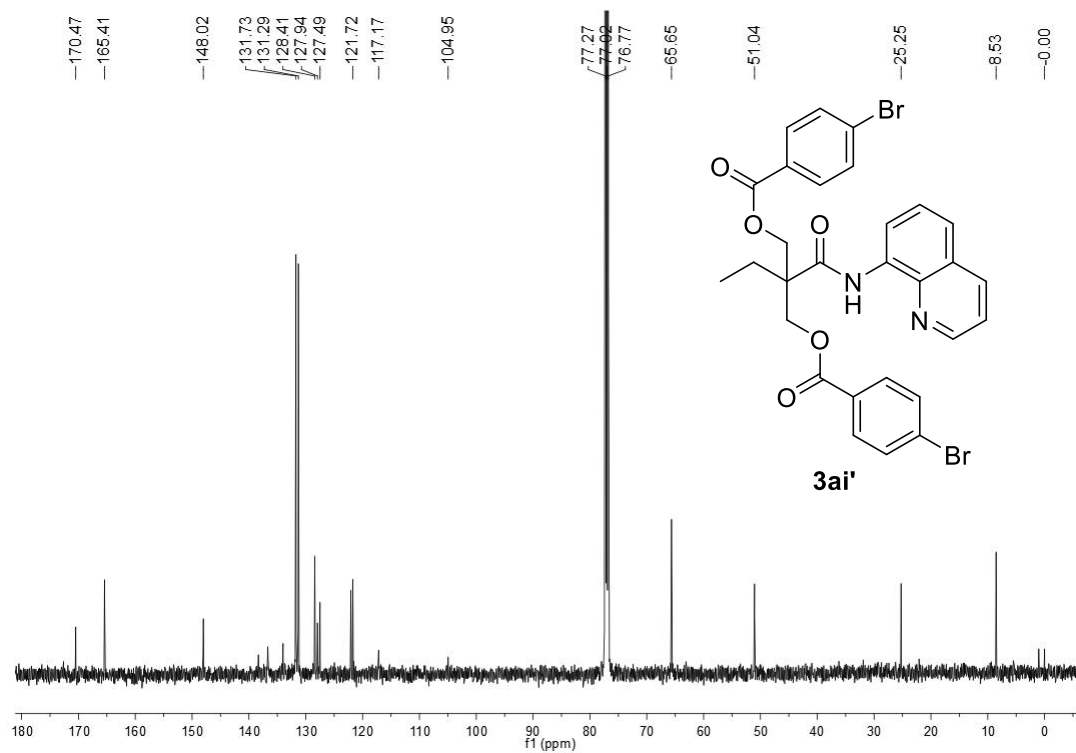

Figure S51. <sup>1</sup>H NMR Spectra of compound 3aj

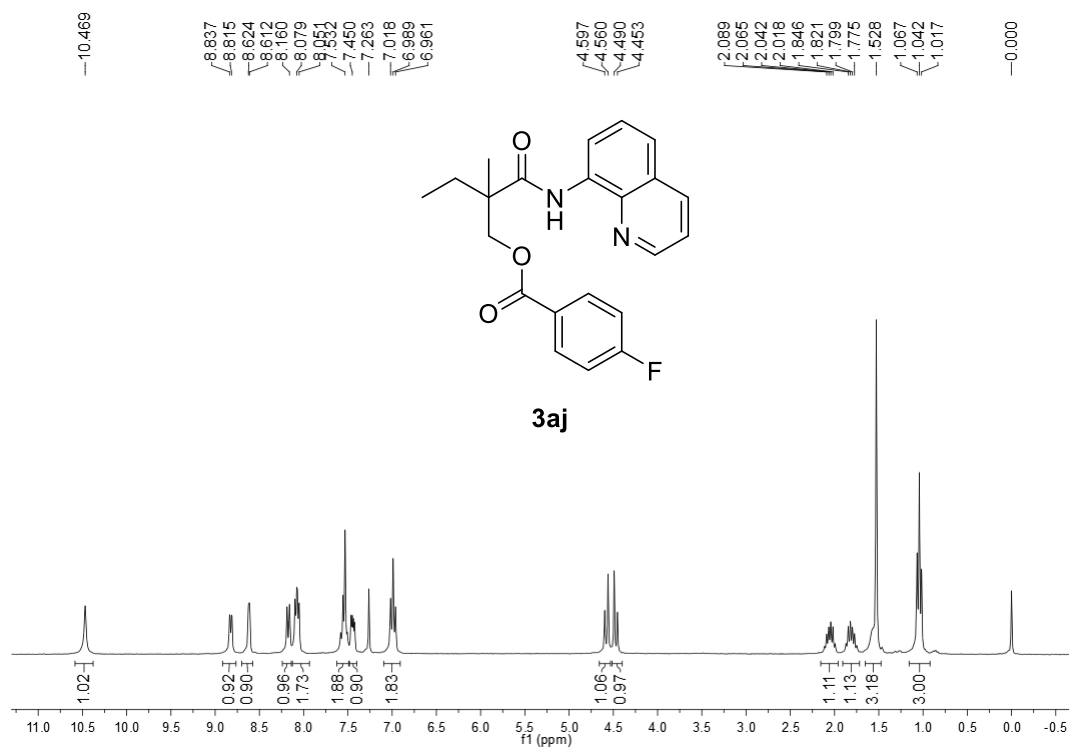

Figure S52. <sup>13</sup>C NMR Spectra of compound 3aj

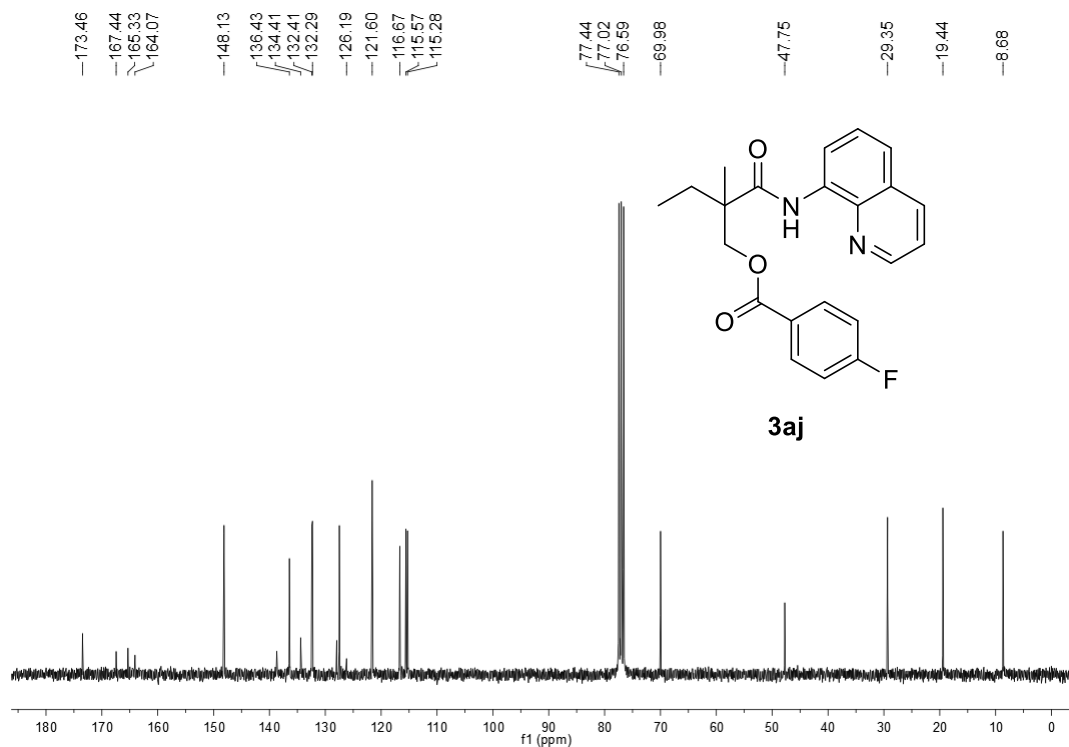



Figure S53. <sup>1</sup>H NMR Spectra of compound 3aj'

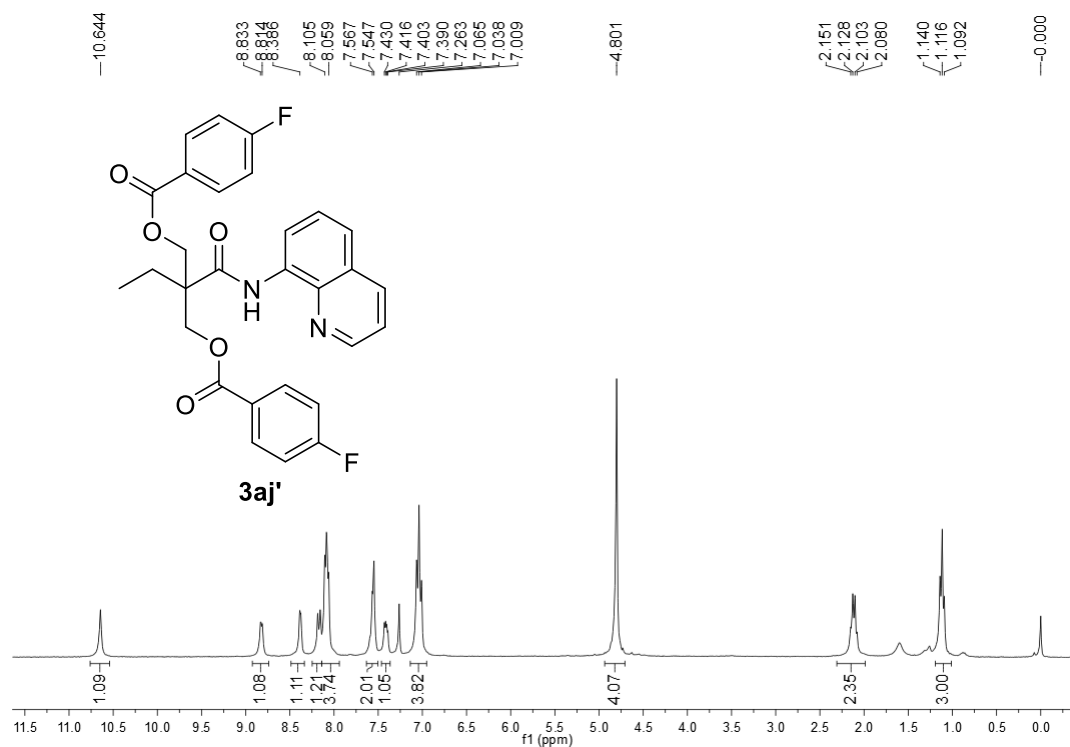

Figure S54. <sup>13</sup>C NMR Spectra of compound 3aj'

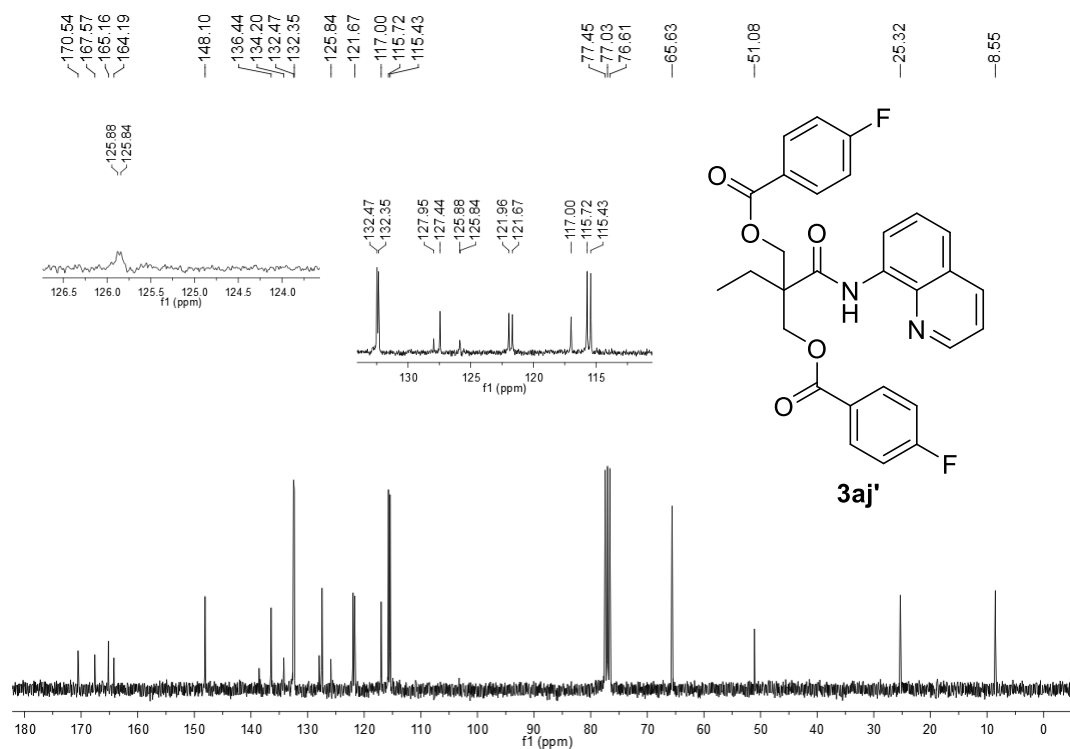

Figure S55. <sup>1</sup>H NMR Spectra of compound 3ak

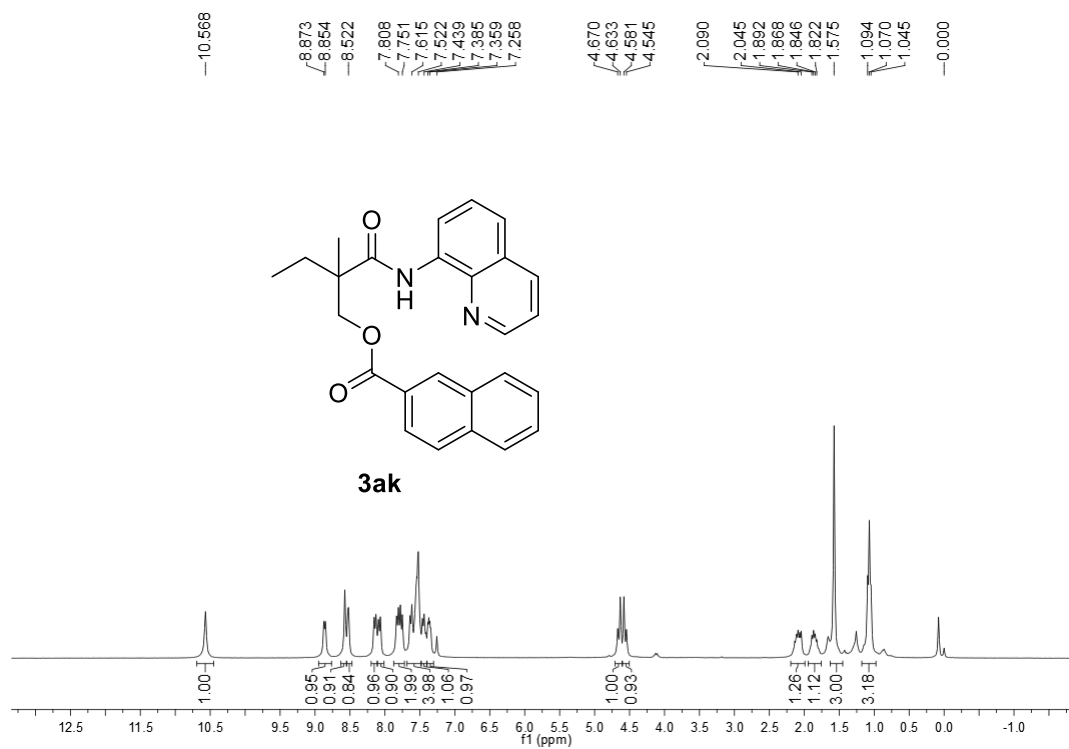

Figure S56. <sup>13</sup>C NMR Spectra of compound 3ak

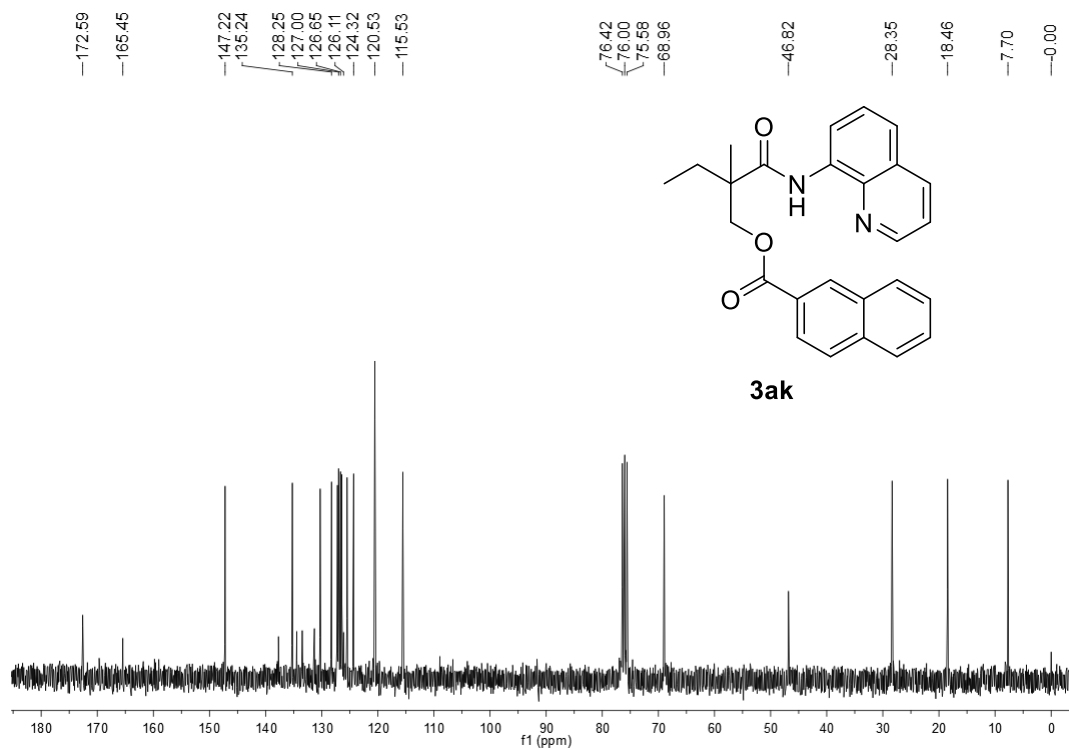

Figure S57. <sup>1</sup>H NMR Spectra of compound 3ak'

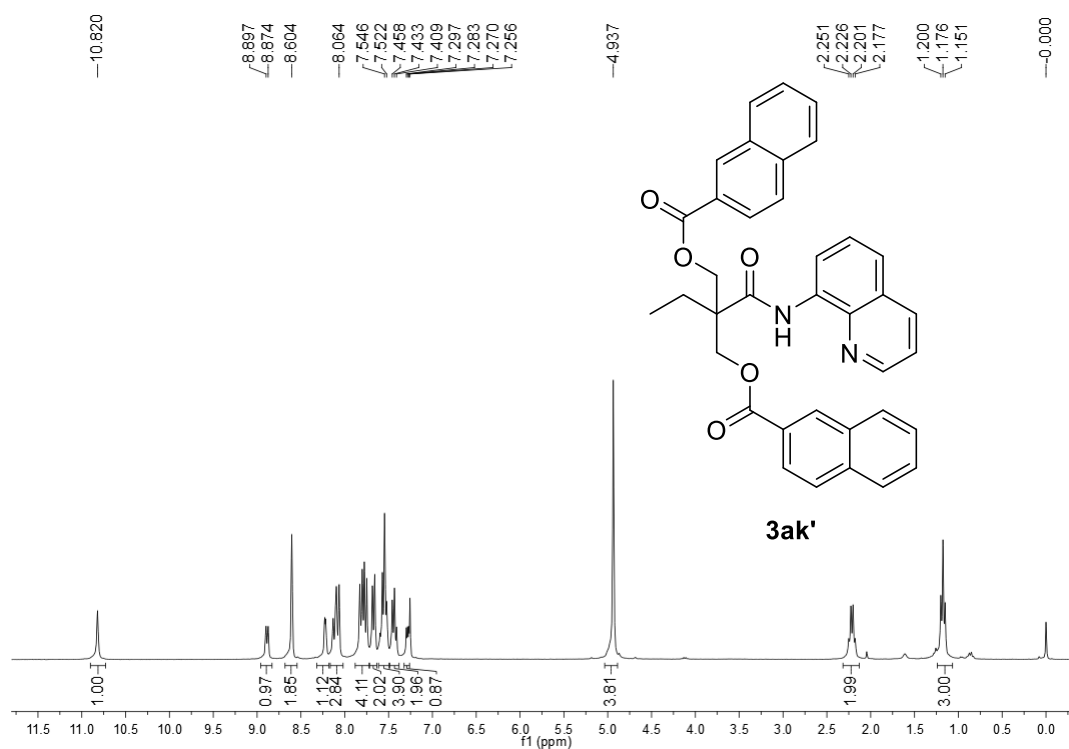

Figure S58. <sup>13</sup>C NMR Spectra of compound 3ak'

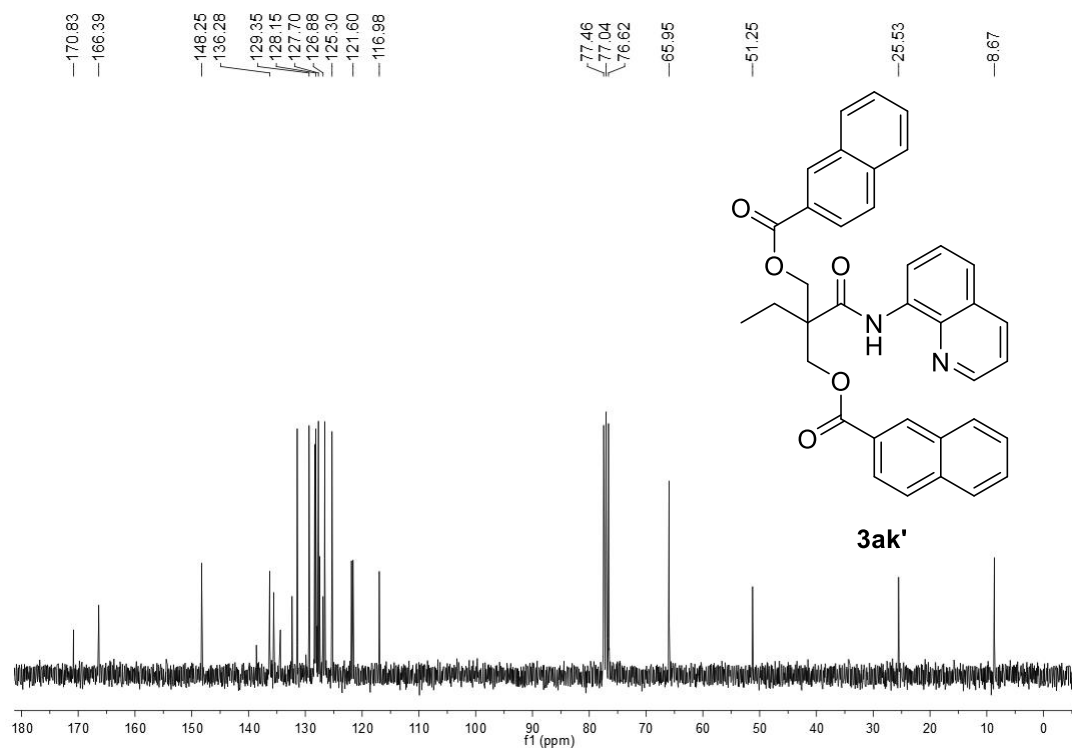

Figure S59. <sup>1</sup>H NMR Spectra of compound 3al

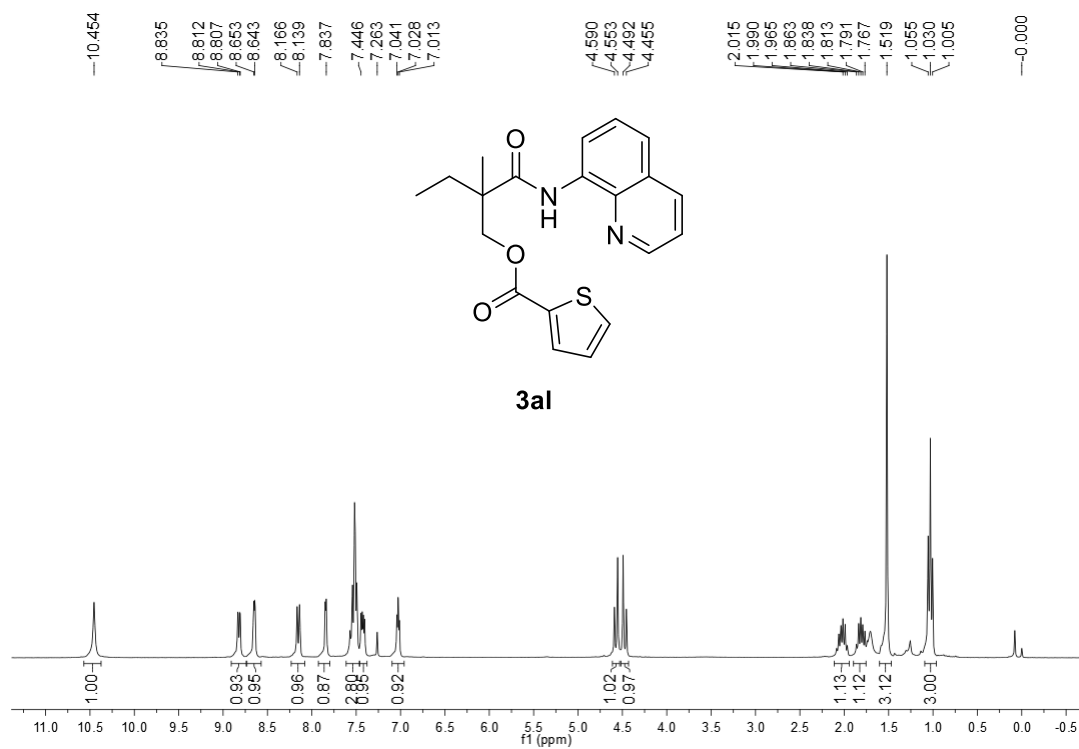

Figure S60. <sup>13</sup>C NMR Spectra of compound 3al

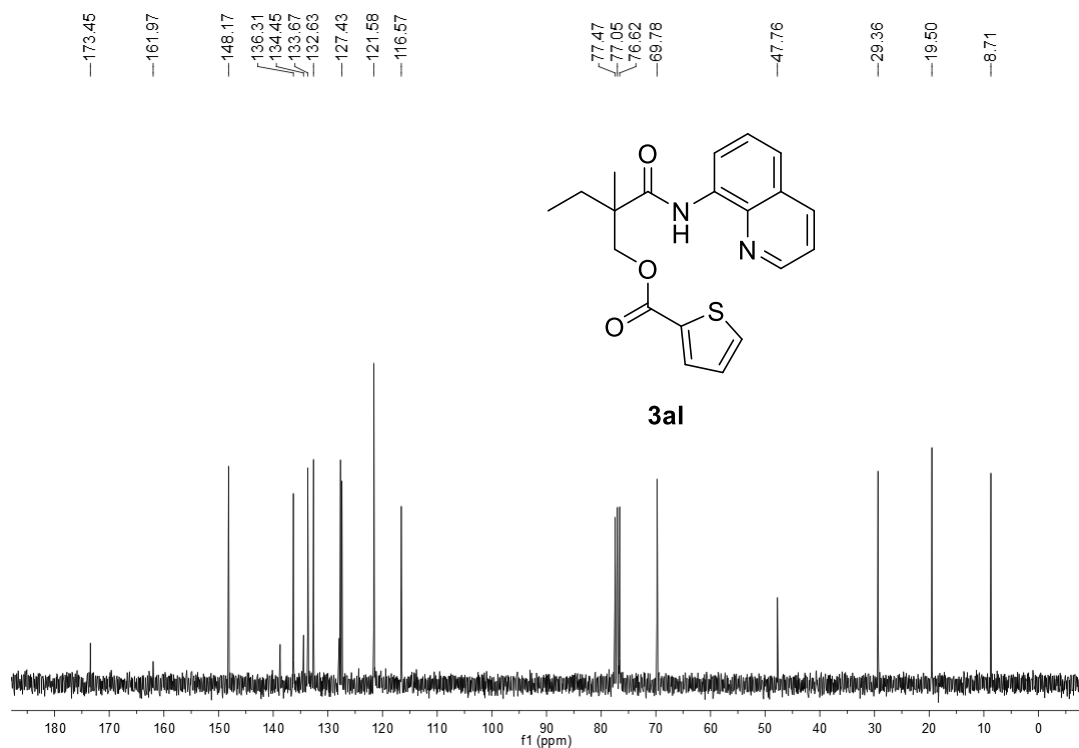

Figure S61. <sup>1</sup>H NMR Spectra of compound 3a'

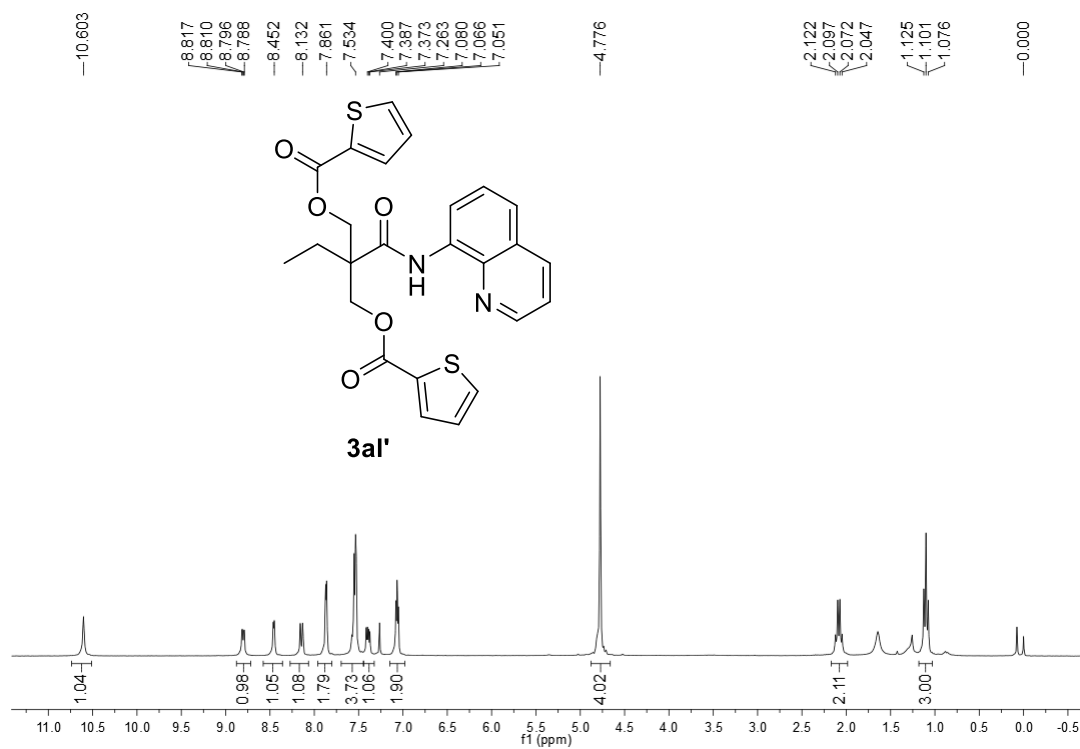

Figure S62. <sup>13</sup>C NMR Spectra of compound 3a'

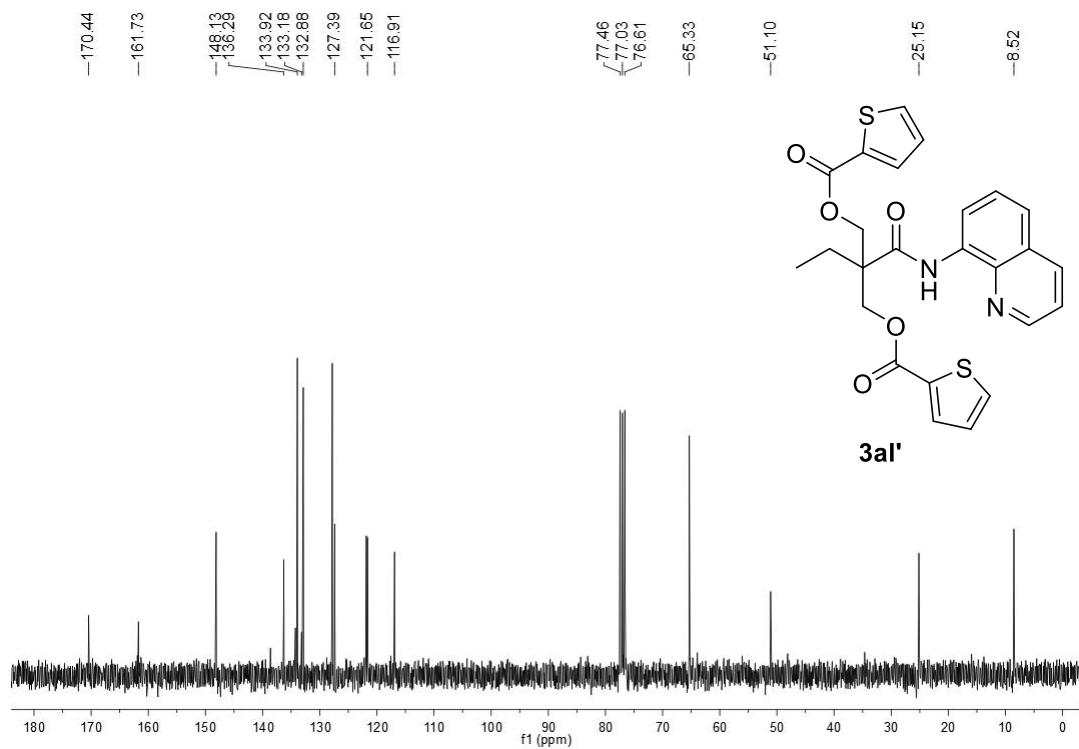

Figure S63. <sup>1</sup>H NMR Spectra of compound 3am

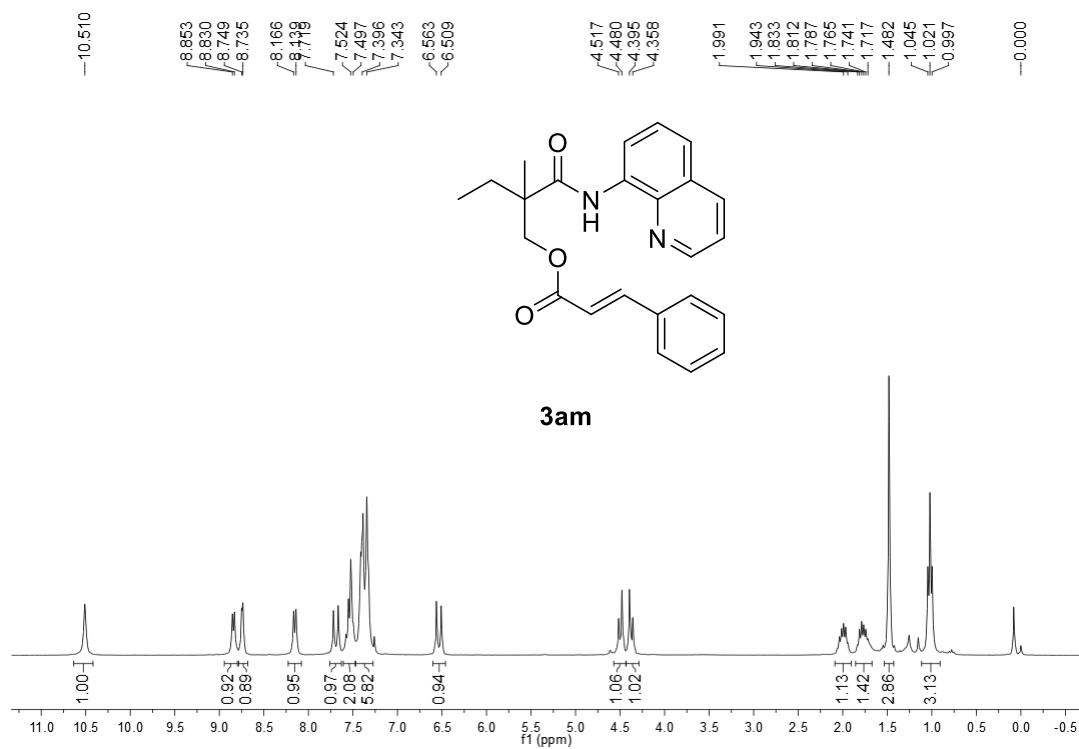

Figure S64. <sup>13</sup>C NMR Spectra of compound 3am

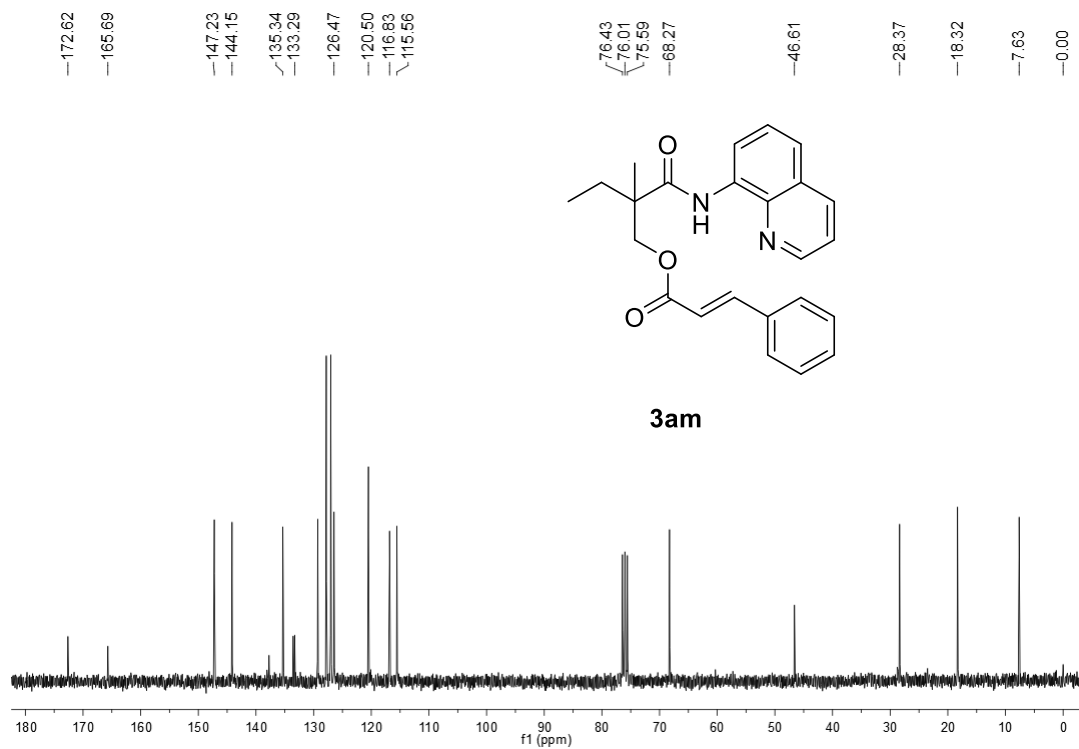

Figure S65. <sup>1</sup>H NMR Spectra of compound 3am'

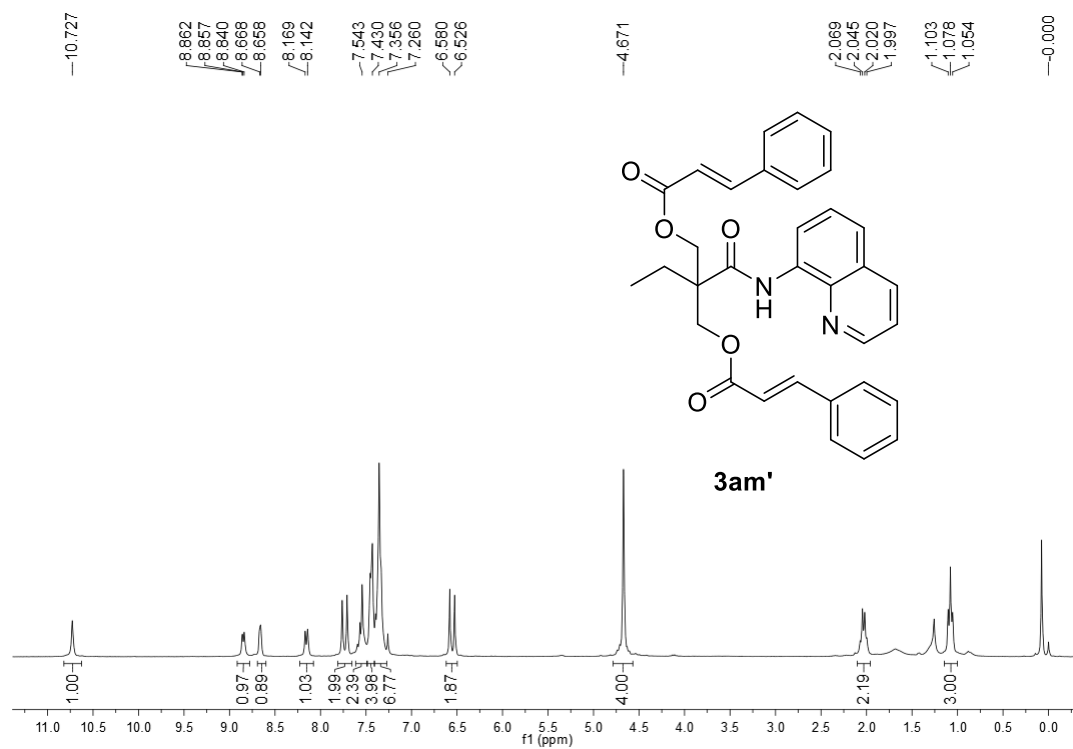

Figure S66. <sup>13</sup>C NMR Spectra of compound 3am'

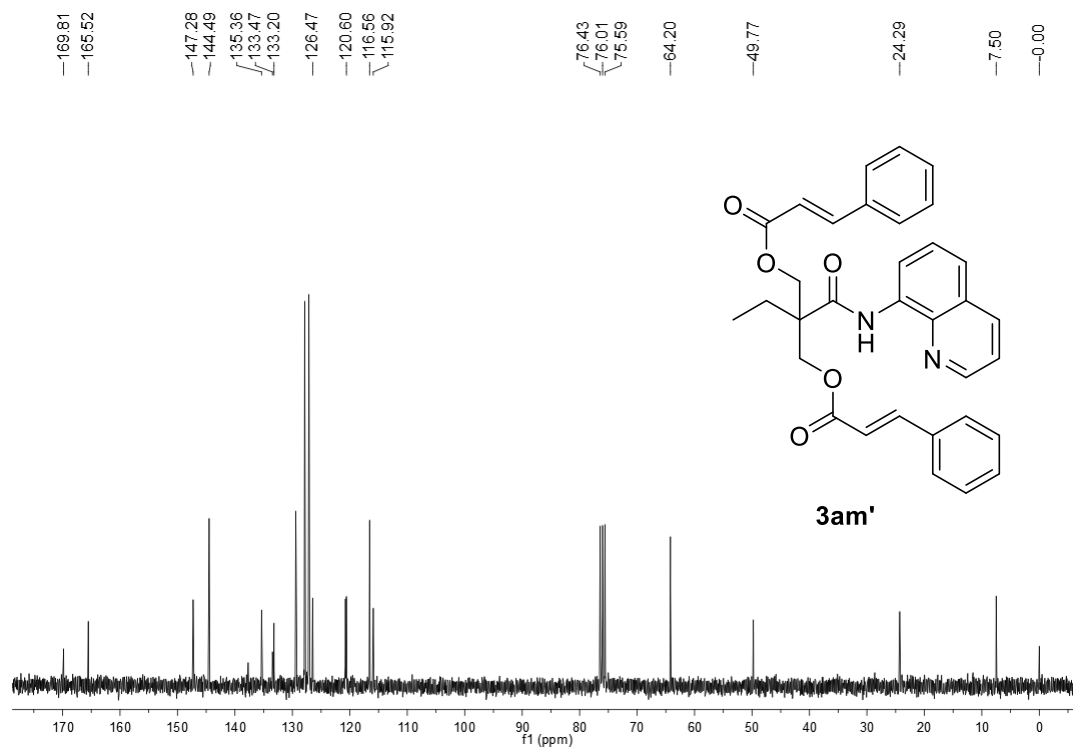

Figure S67. <sup>1</sup>H NMR Spectra of compound 3an

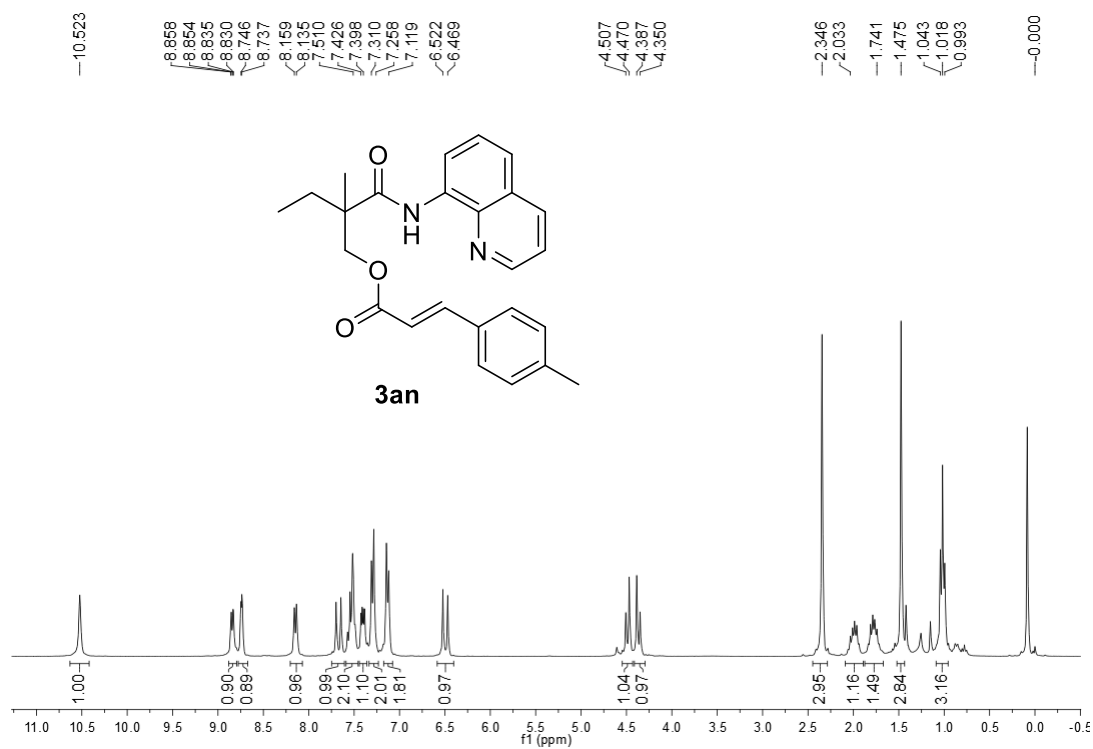

Figure S68. <sup>13</sup>C NMR Spectra of compound 3an

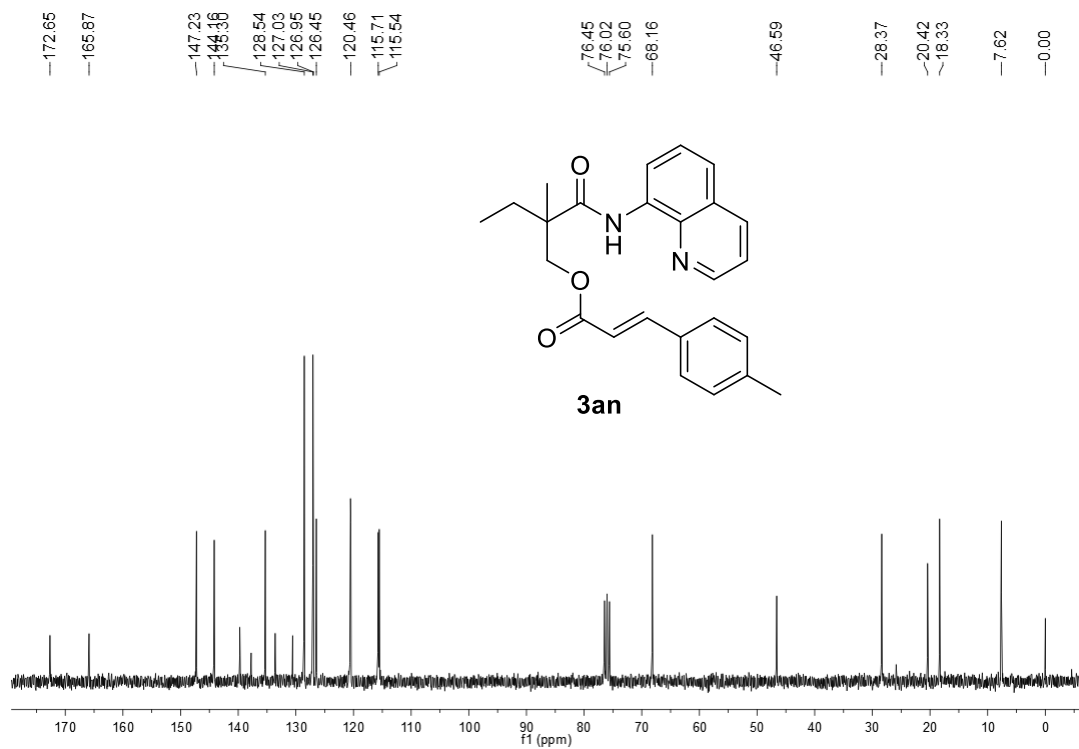



Figure S69. <sup>1</sup>H NMR Spectra of compound 3an'

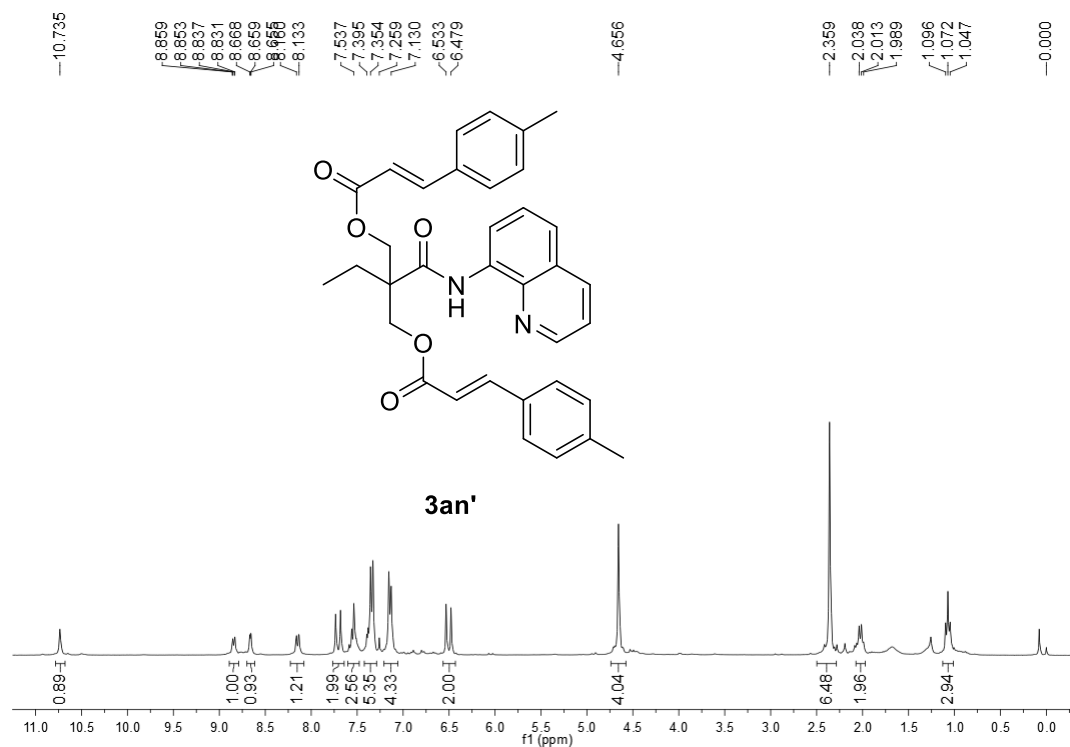

Figure S70. <sup>13</sup>C NMR Spectra of compound 3an'

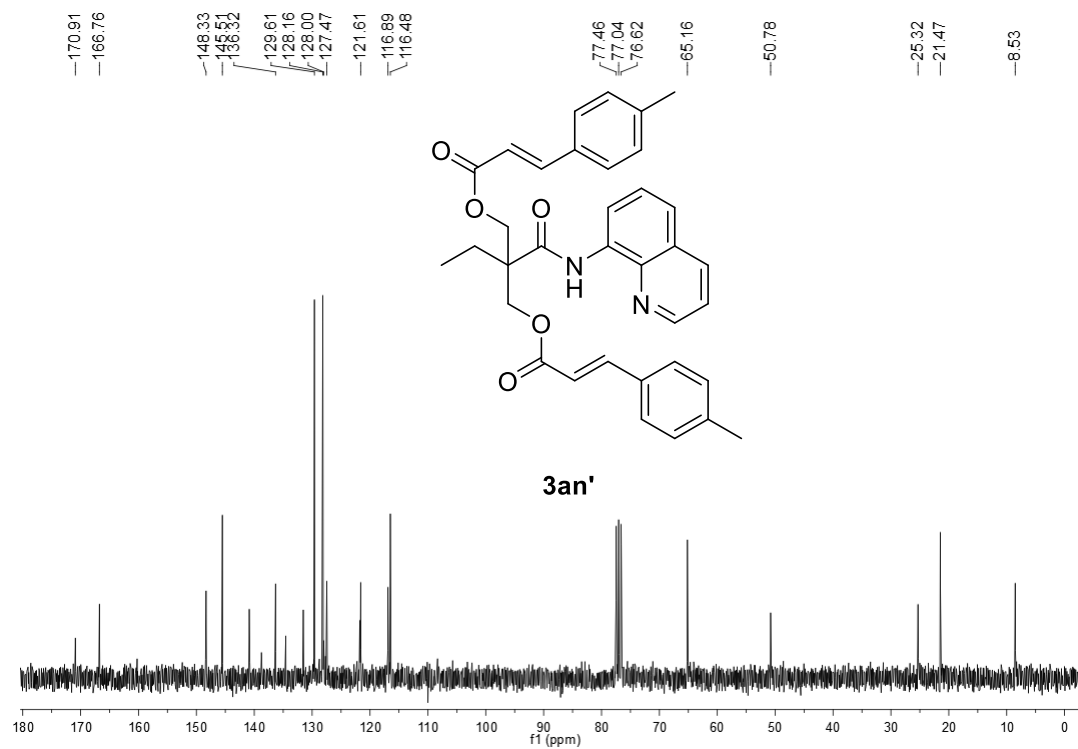

Figure S71. <sup>1</sup>H NMR Spectra of compound 3ao

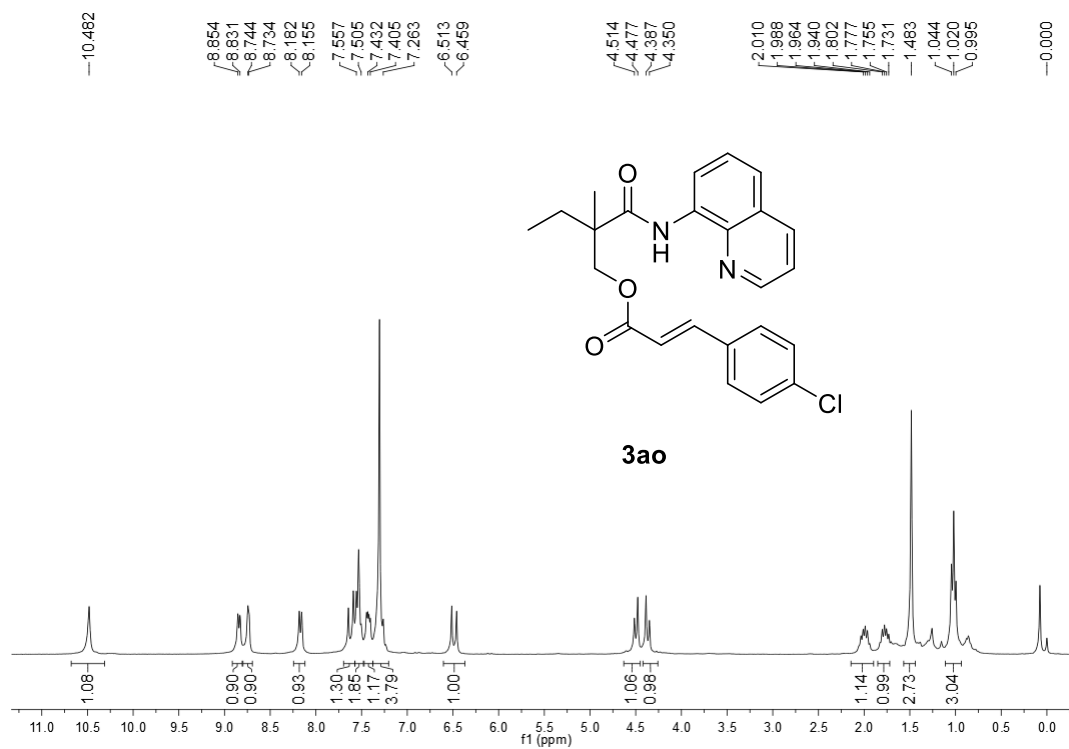

Figure S72. <sup>13</sup>C NMR Spectra of compound 3ao

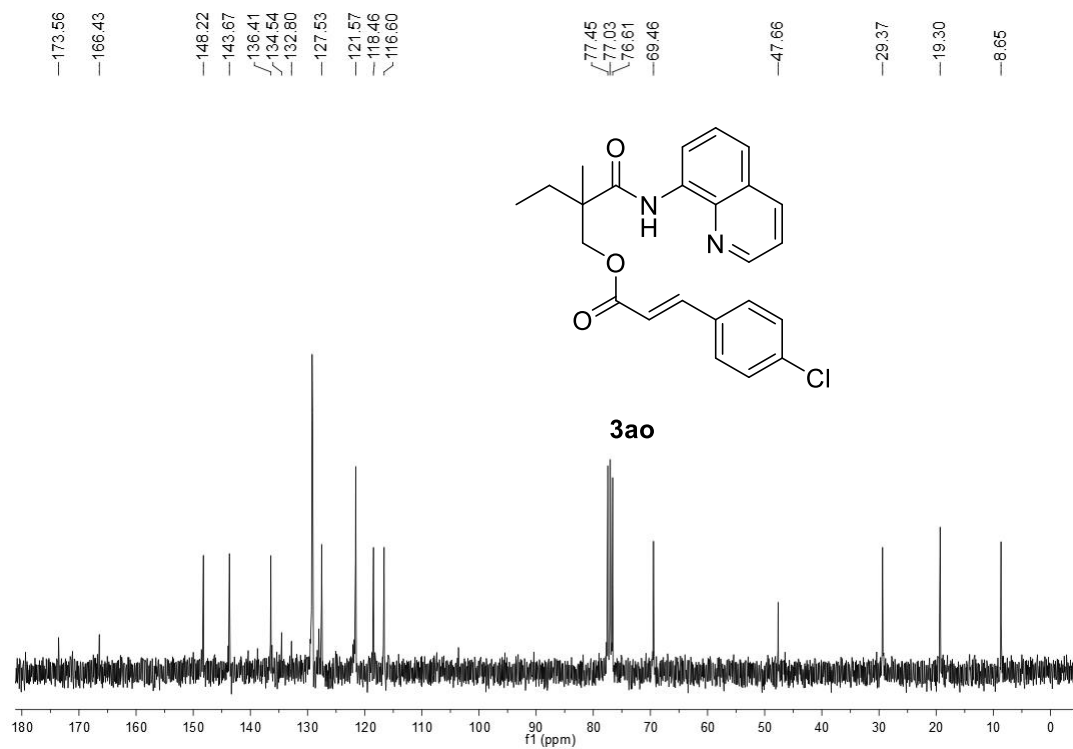

Figure S73.  $^1\text{H}$  NMR Spectra of compound **3ao'**

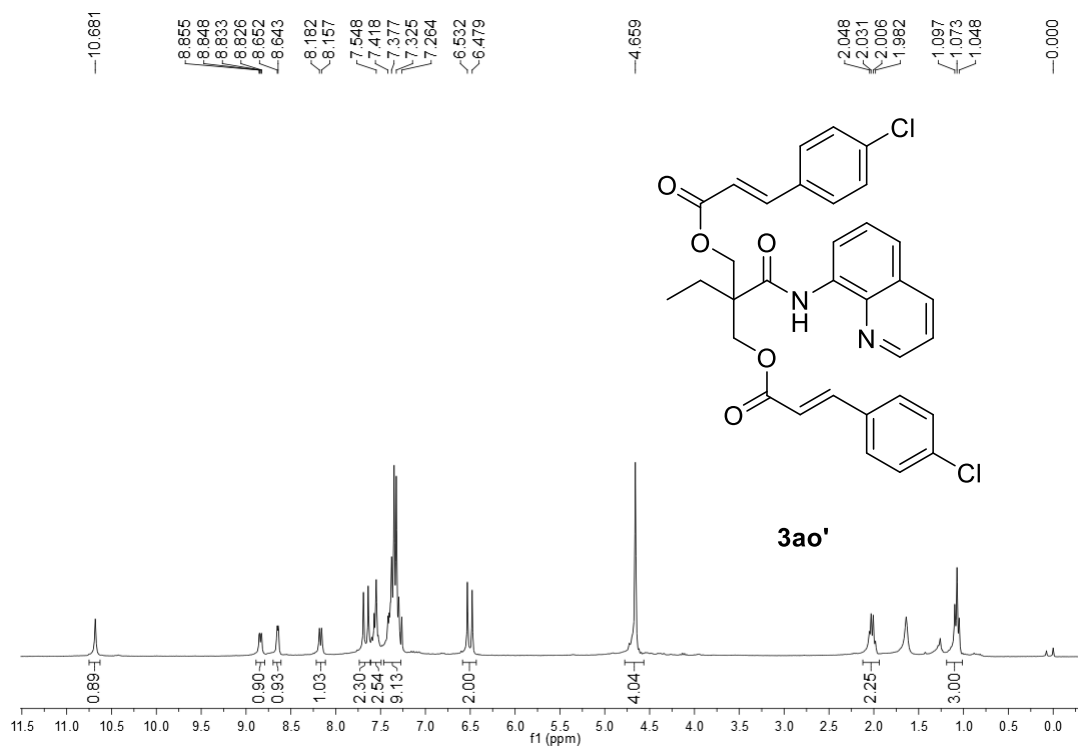

Figure S74.  $^{13}\text{C}$  NMR Spectra of compound **3ao'**

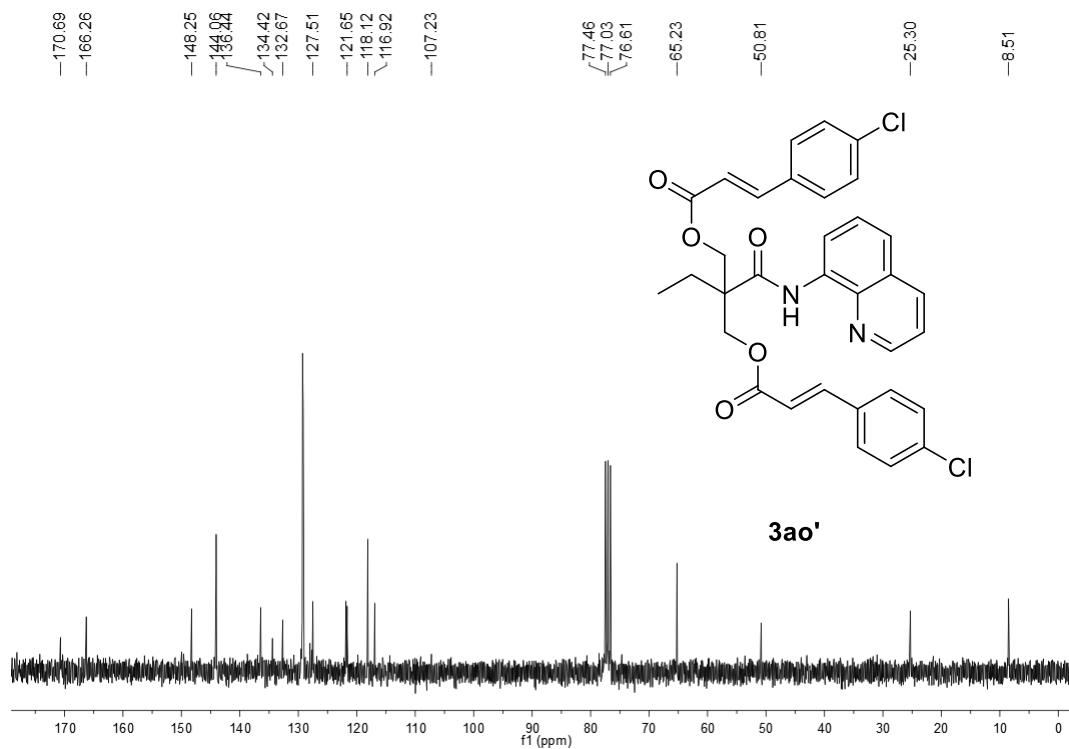

Figure S75. <sup>1</sup>H NMR Spectra of compound 3ap

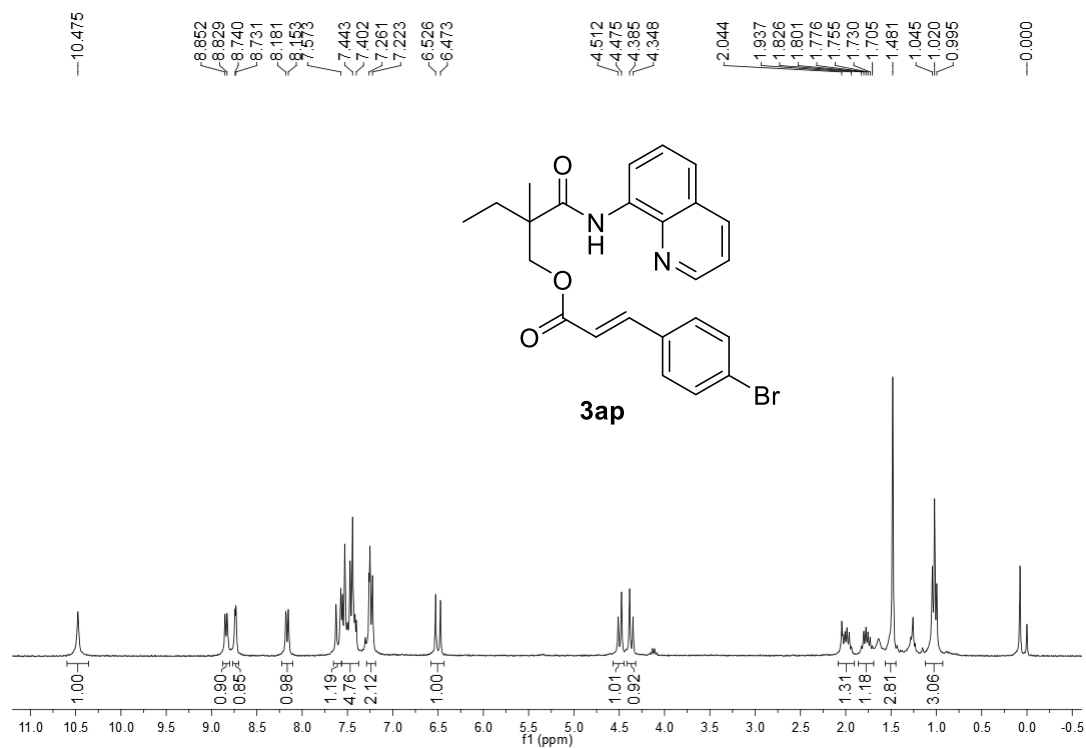

Figure S76. <sup>13</sup>C NMR Spectra of compound 3ap

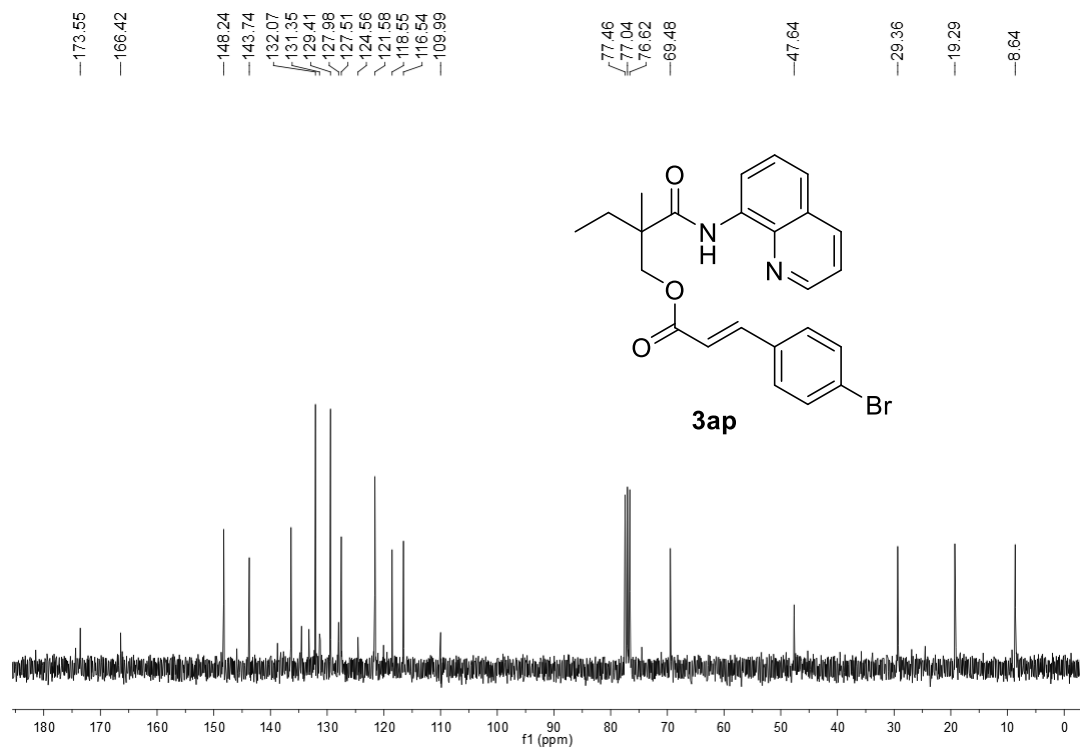

Figure S77. <sup>1</sup>H NMR Spectra of compound 3ap'

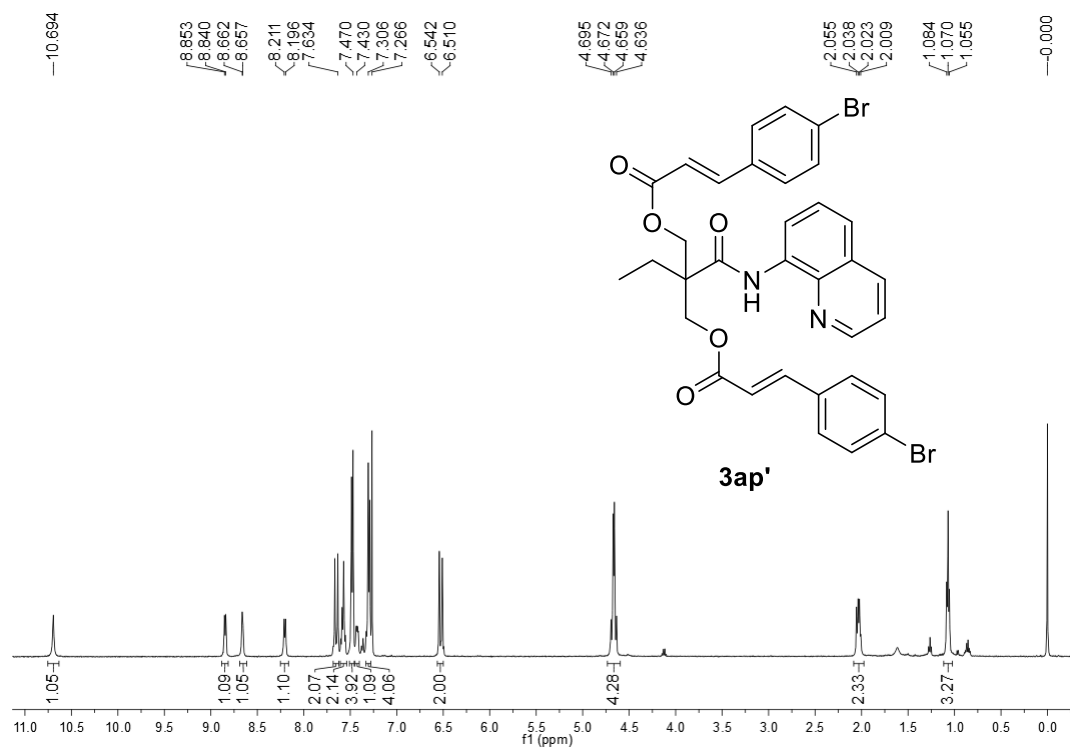

Figure S78. <sup>13</sup>C NMR Spectra of compound 3ap'

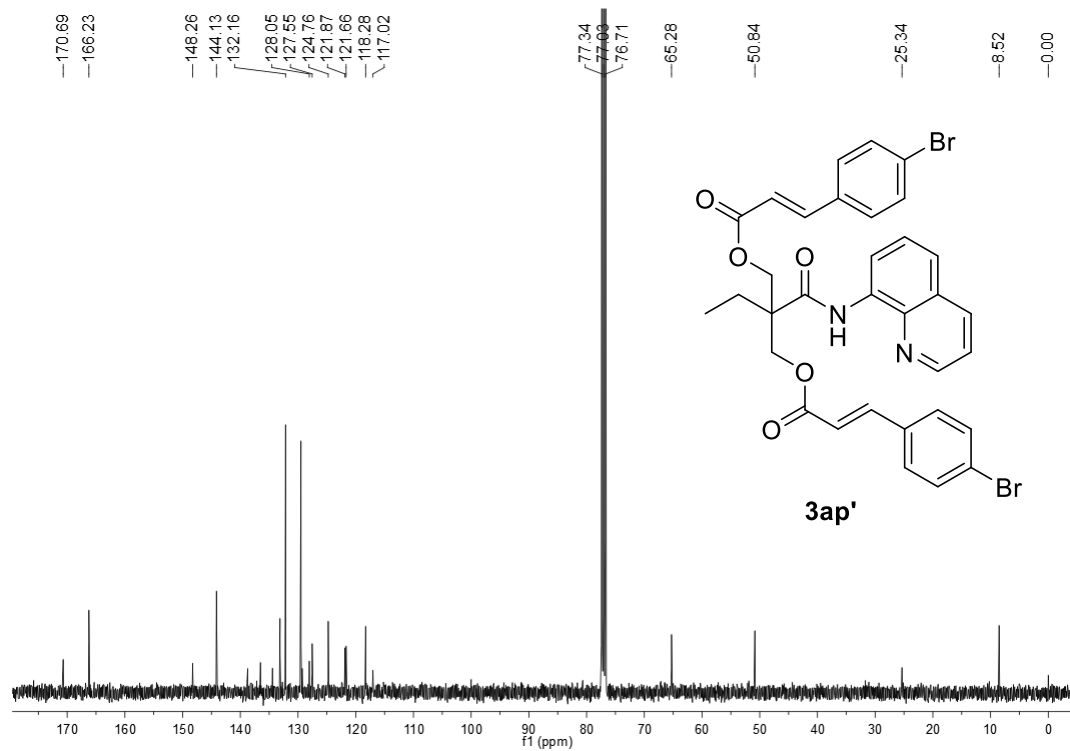

Figure S79. <sup>1</sup>H NMR Spectra of compound 3aq

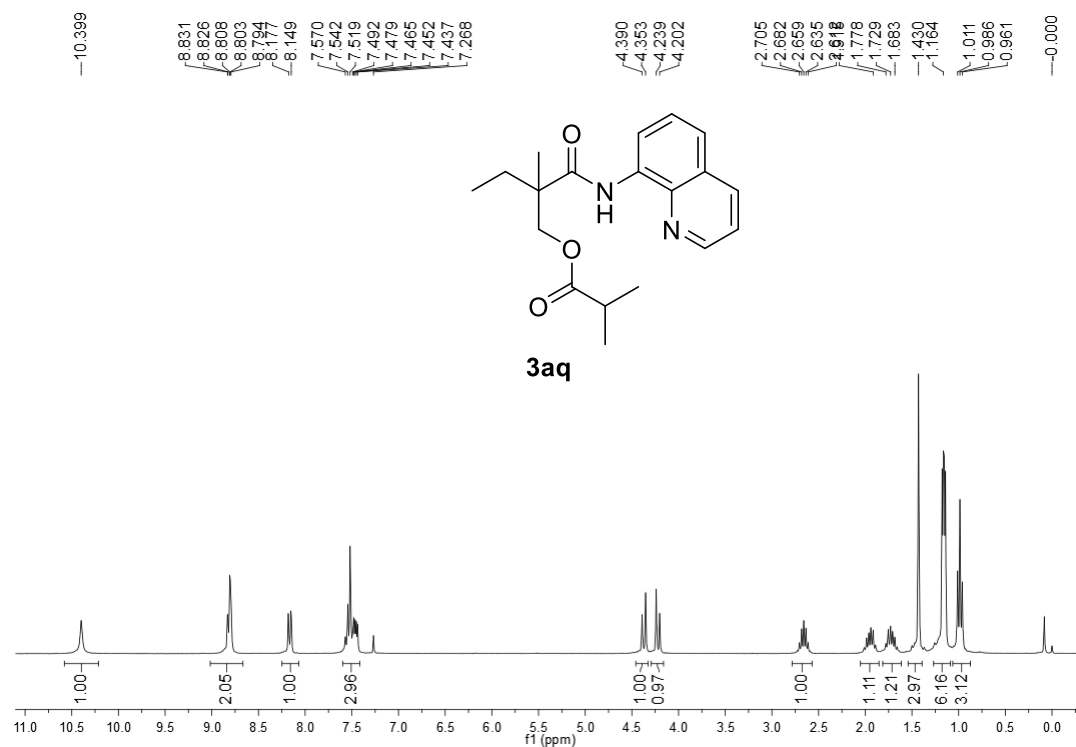

Figure S80. <sup>13</sup>C NMR Spectra of compound 3aq

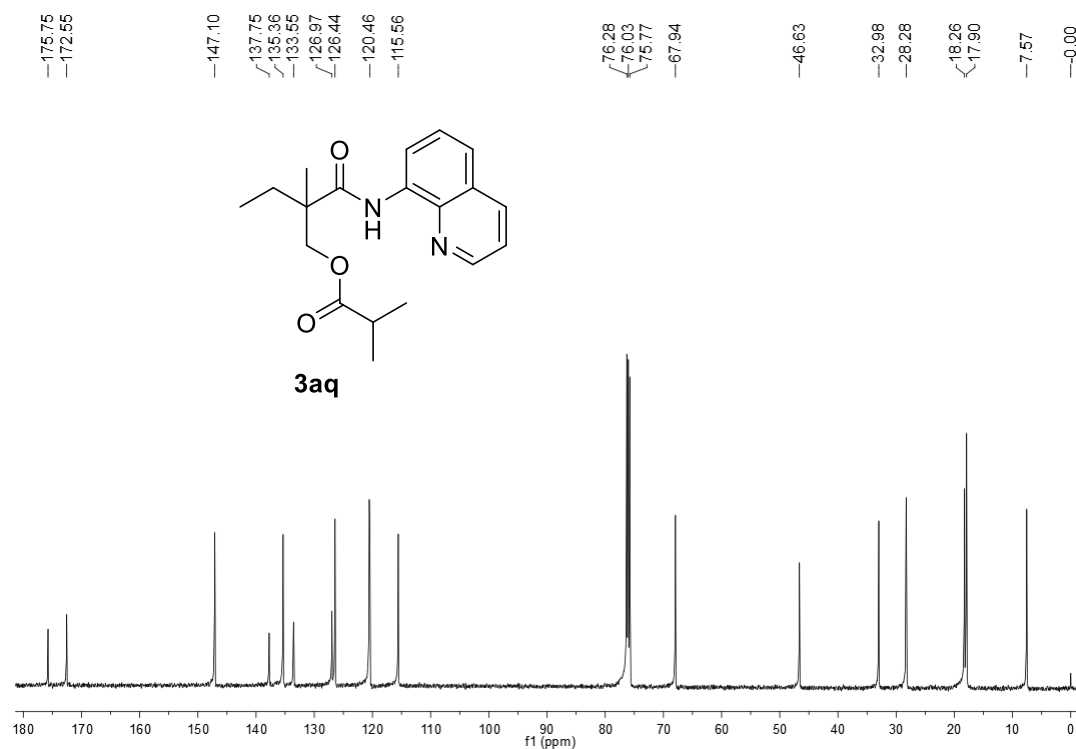

Figure S81. <sup>1</sup>H NMR Spectra of compound 3aq'

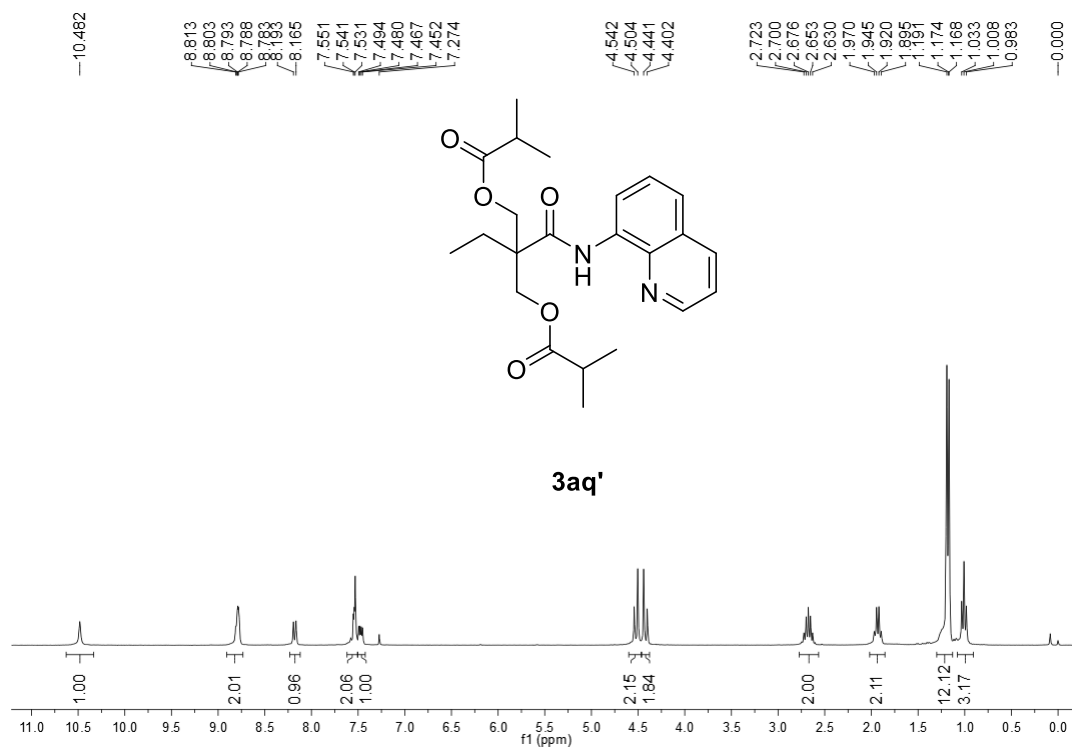

Figure S82. <sup>13</sup>C NMR Spectra of compound 3aq'

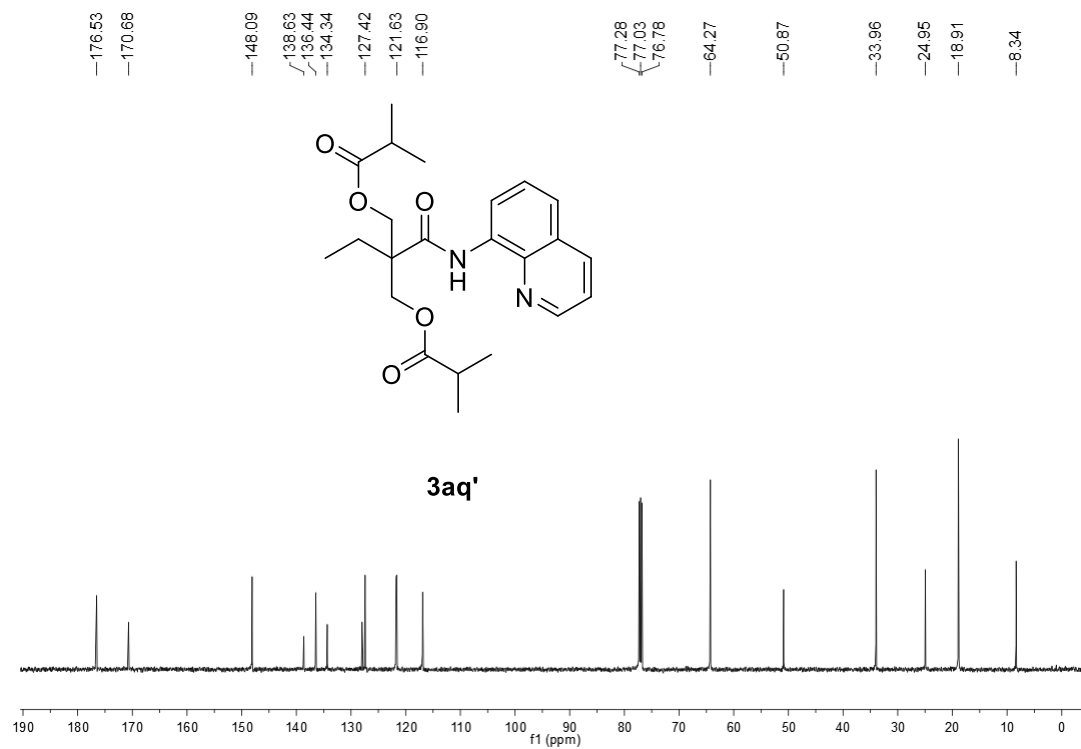

Figure S83. <sup>1</sup>H NMR Spectra of compound 3ar

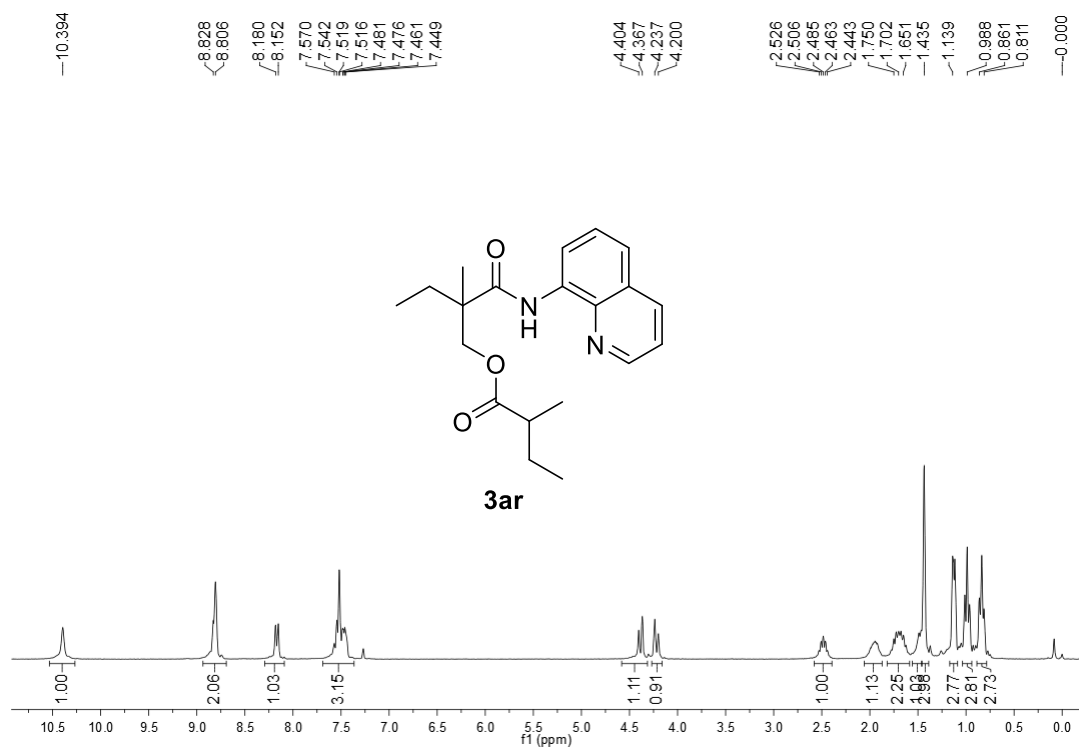

Figure S84. <sup>13</sup>C NMR Spectra of compound 3ar

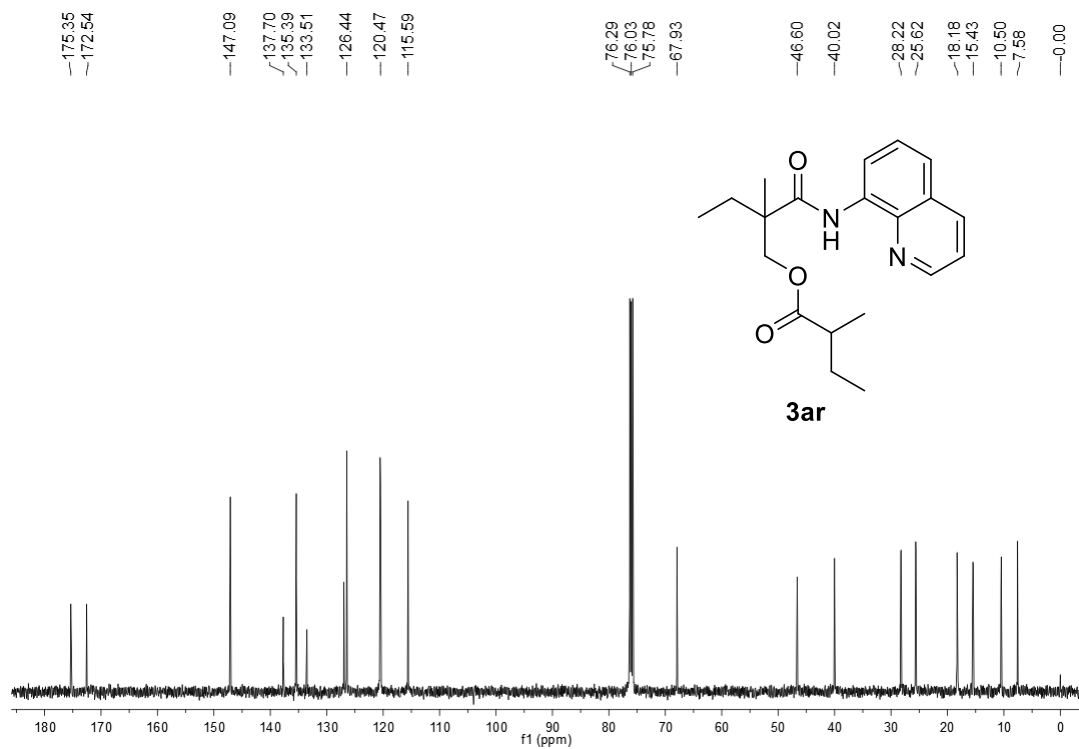



Figure S85. <sup>1</sup>H NMR Spectra of compound 3ar'

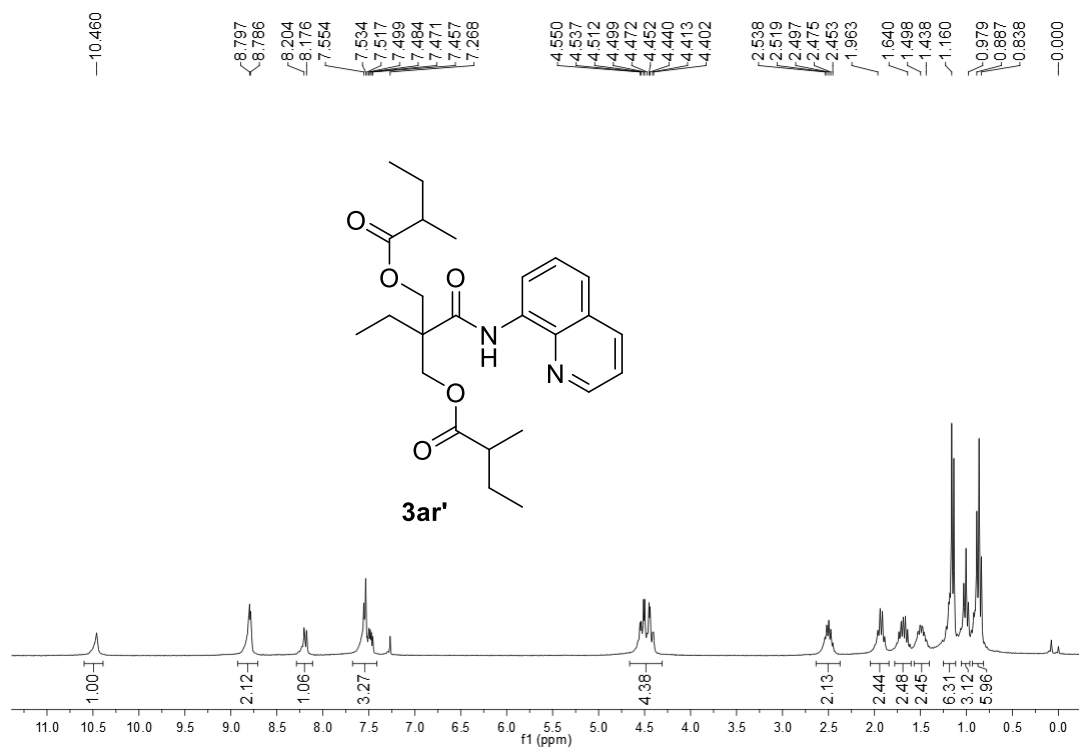

Figure S86. <sup>13</sup>C NMR Spectra of compound 3ar'

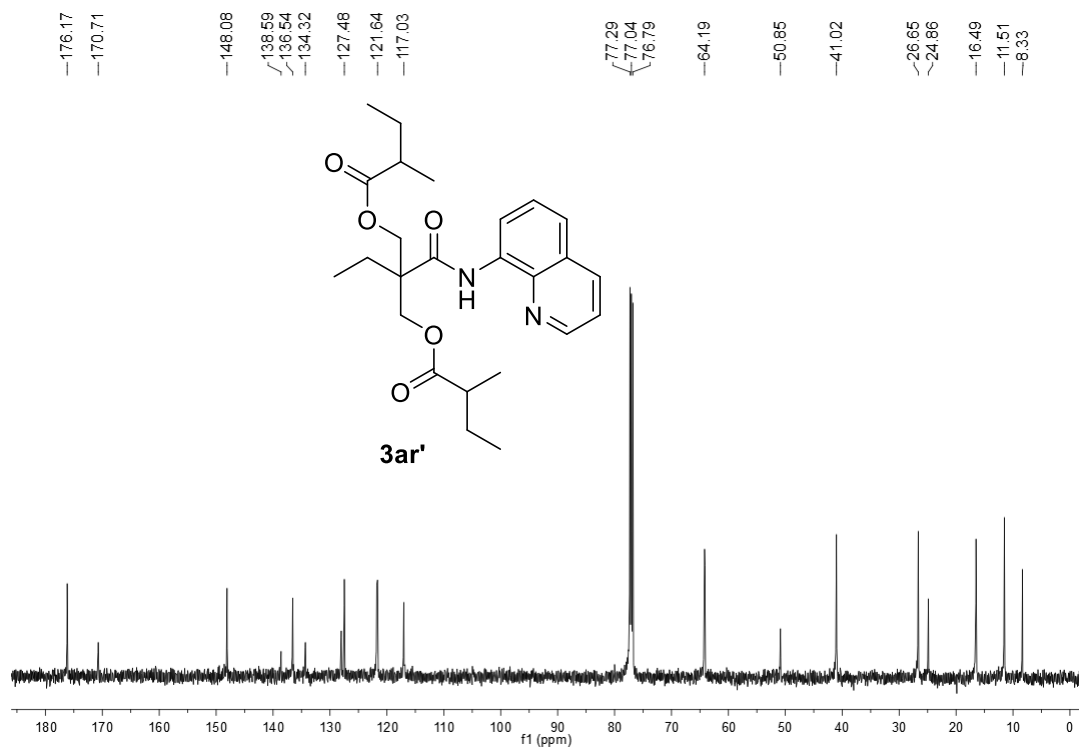

Figure S87. <sup>1</sup>H NMR Spectra of compound 3ba

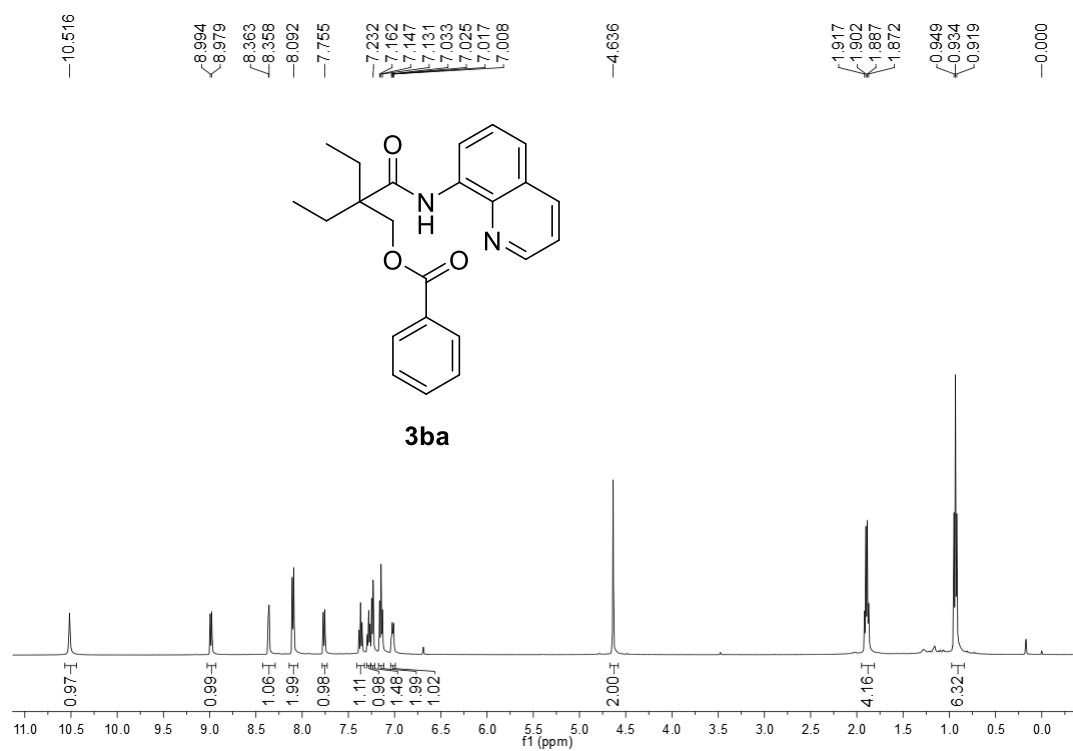

Figure S88. <sup>13</sup>C NMR Spectra of compound 3ba

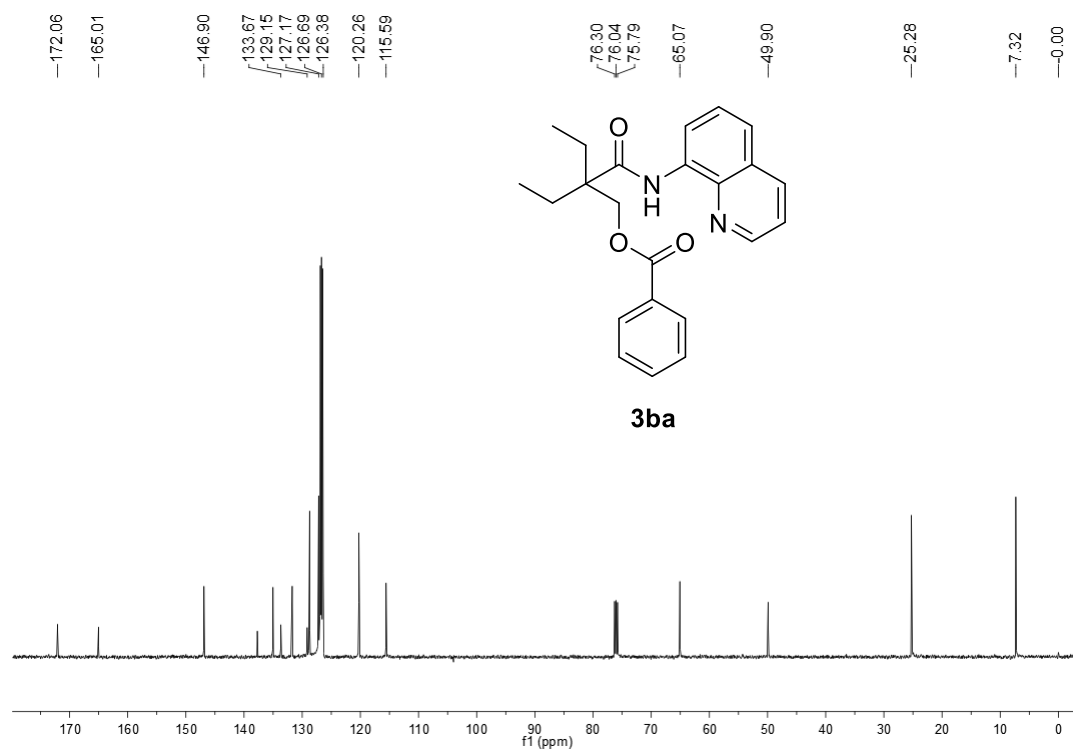

Figure S89. <sup>1</sup>H NMR Spectra of compound 3bb

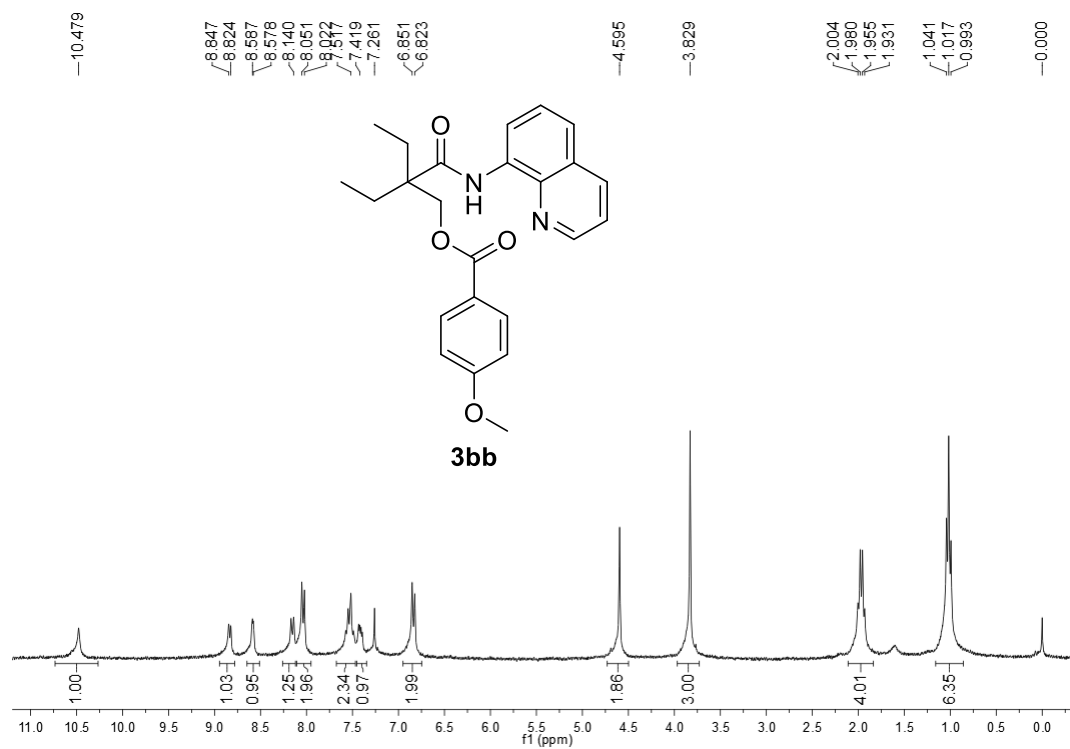

Figure S90. <sup>13</sup>C NMR Spectra of compound 3bb

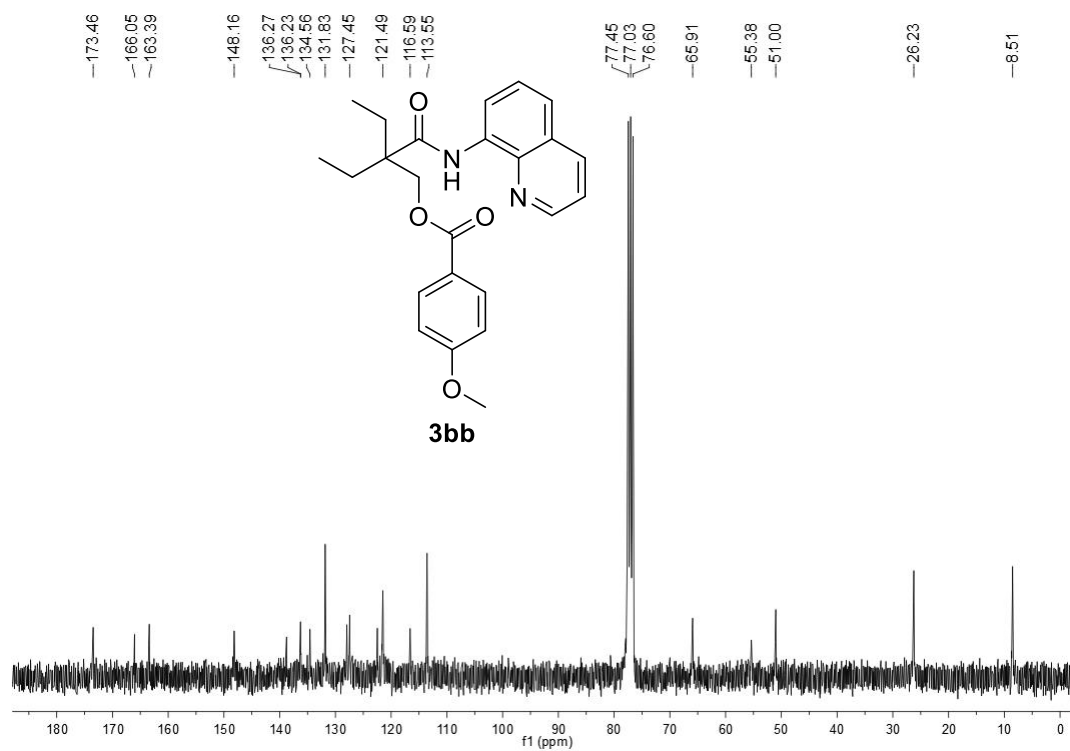

Figure S91. <sup>1</sup>H NMR Spectra of compound 3bc

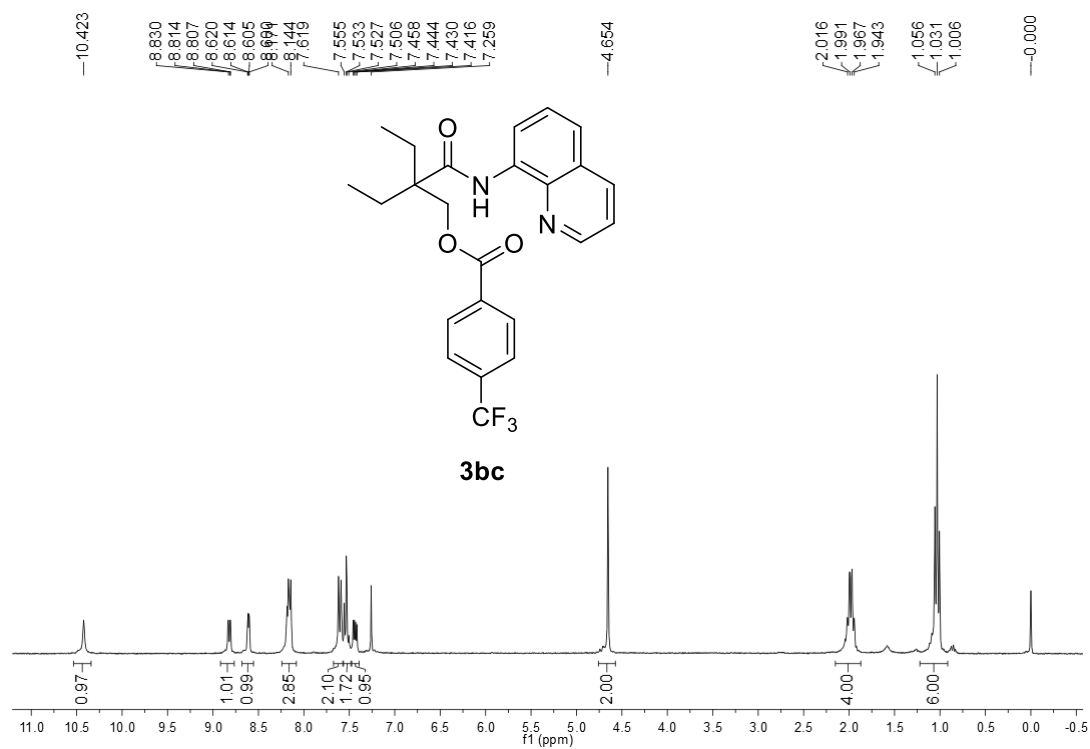

Figure S92. <sup>13</sup>C NMR Spectra of compound 3bc

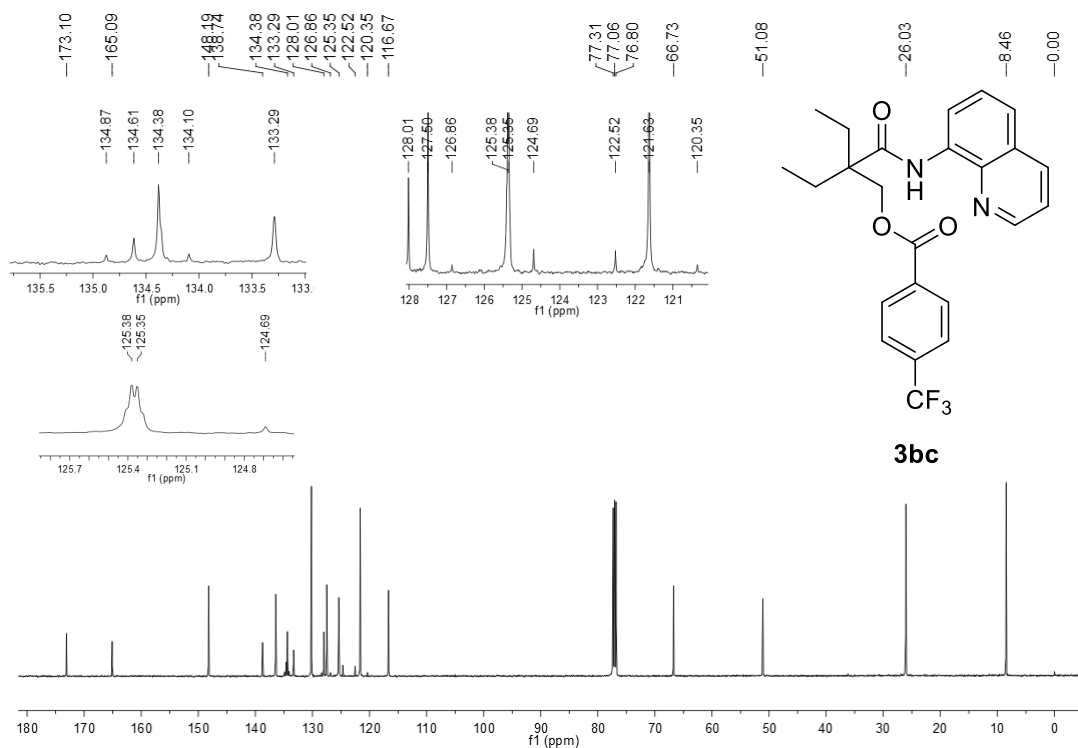

Figure S93. <sup>1</sup>H NMR Spectra of compound 3ca

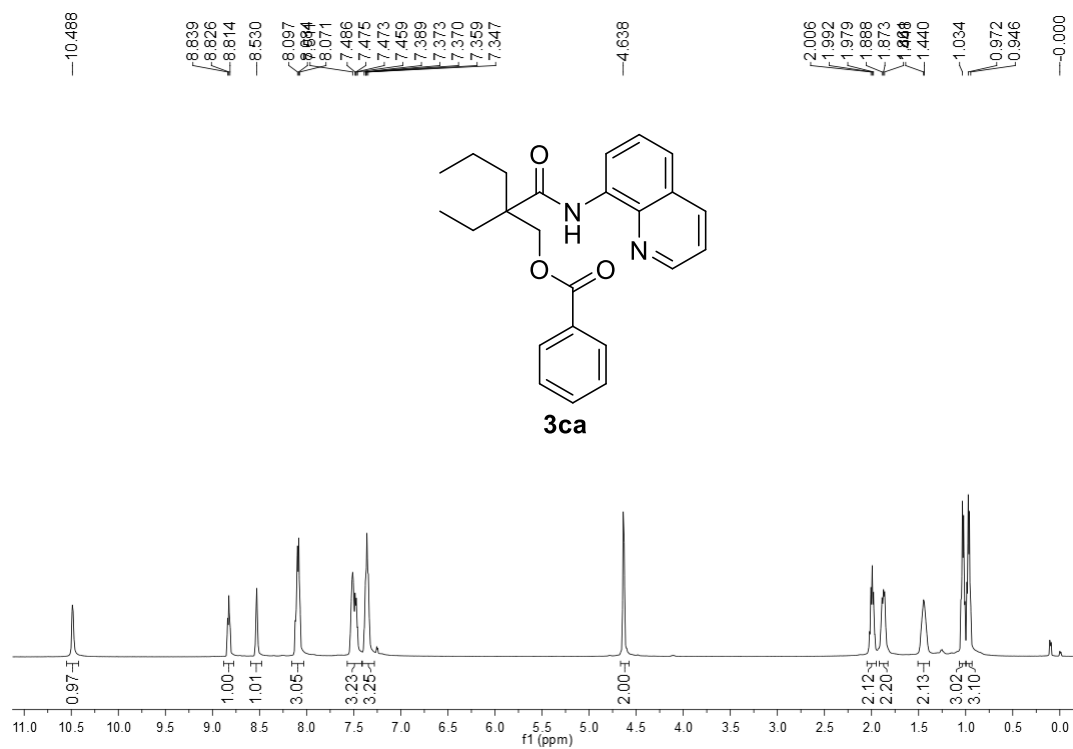

Figure S94. <sup>13</sup>C NMR Spectra of compound 3ca

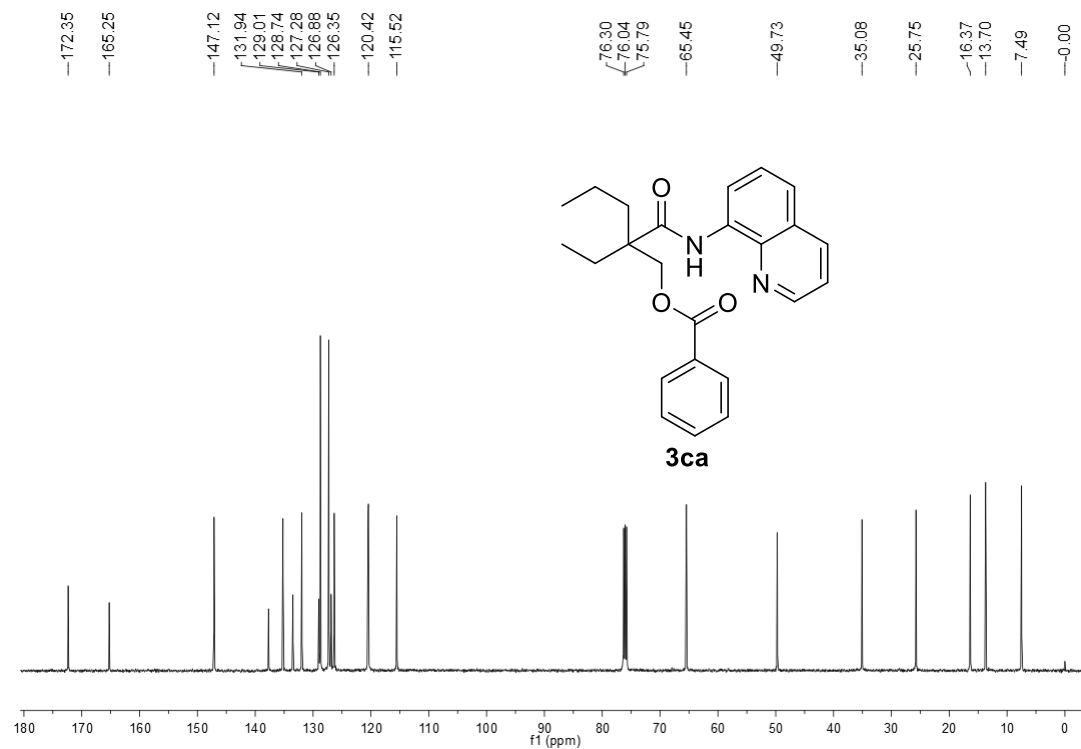

Figure S95. <sup>1</sup>H NMR Spectra of compound 3da

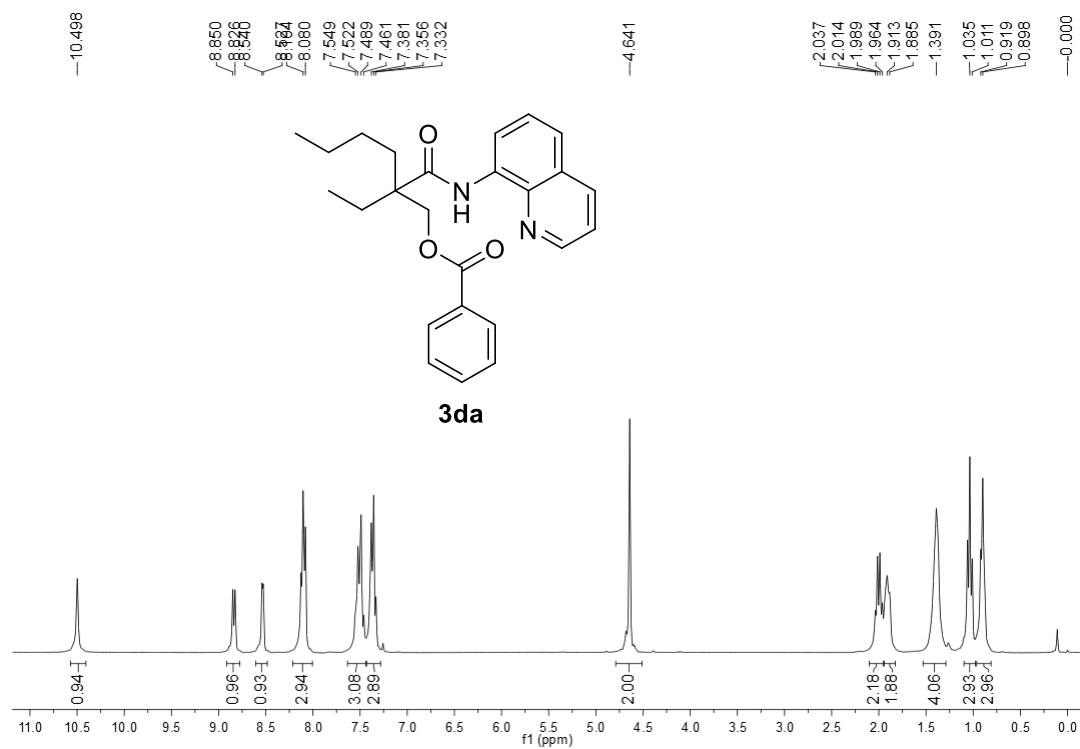

Figure S96. <sup>13</sup>C NMR Spectra of compound 3da

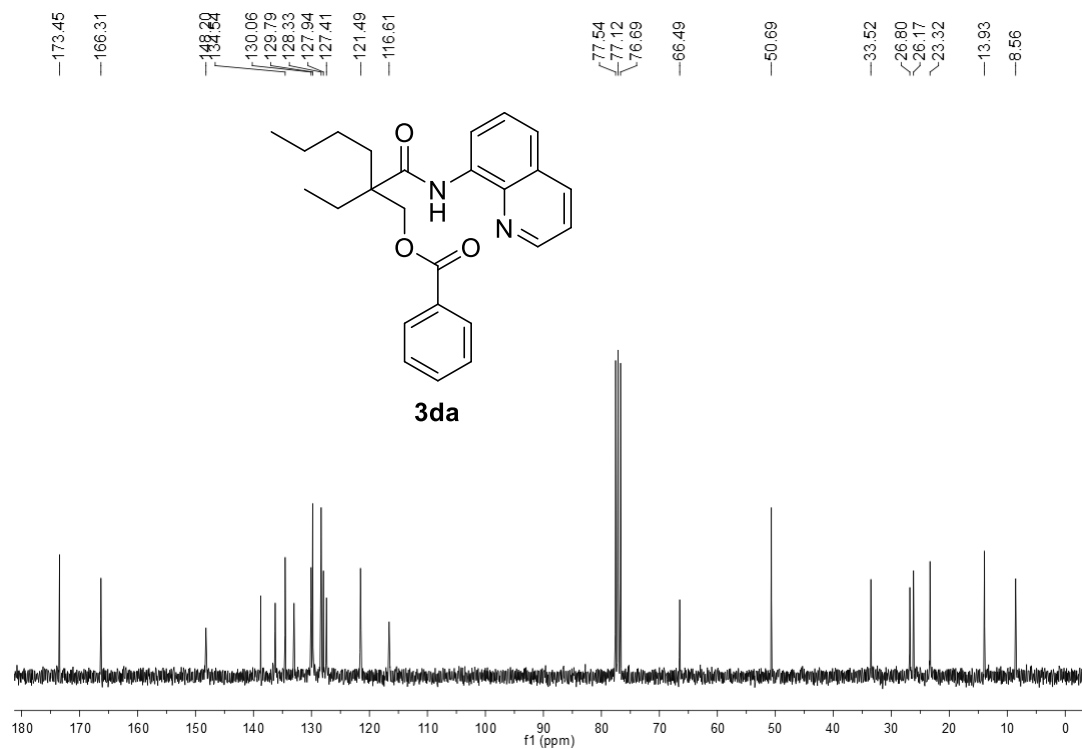

Figure S97. <sup>1</sup>H NMR Spectra of compound 3ea

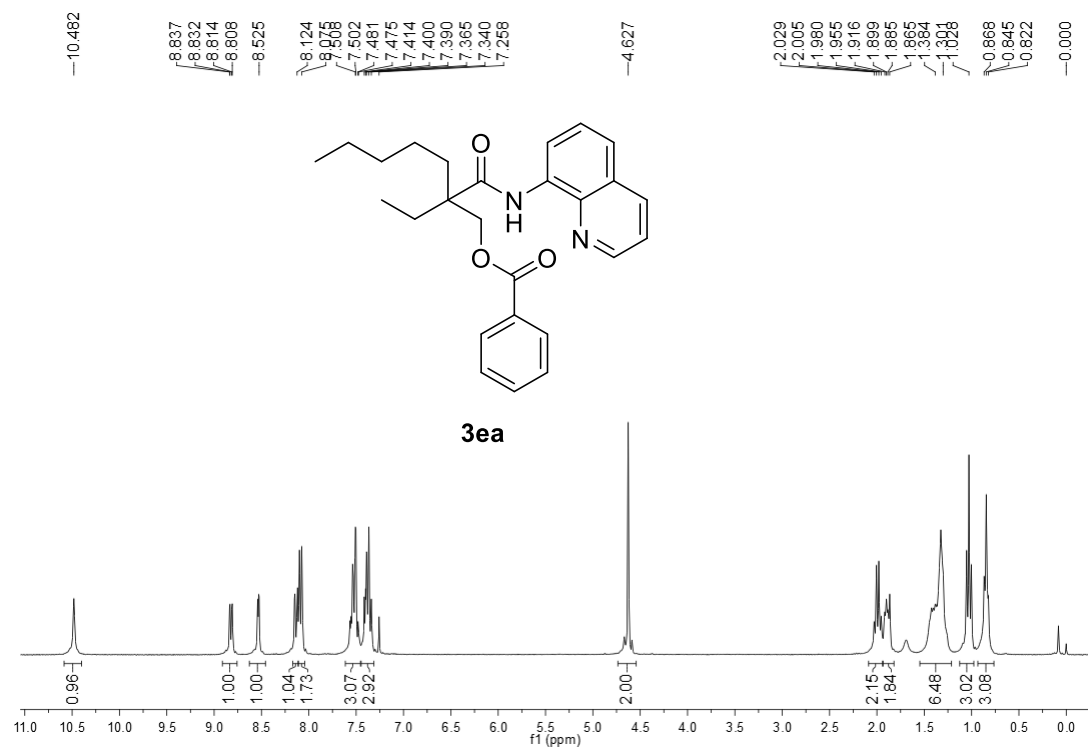

Figure S98. <sup>13</sup>C NMR Spectra of compound 3ea

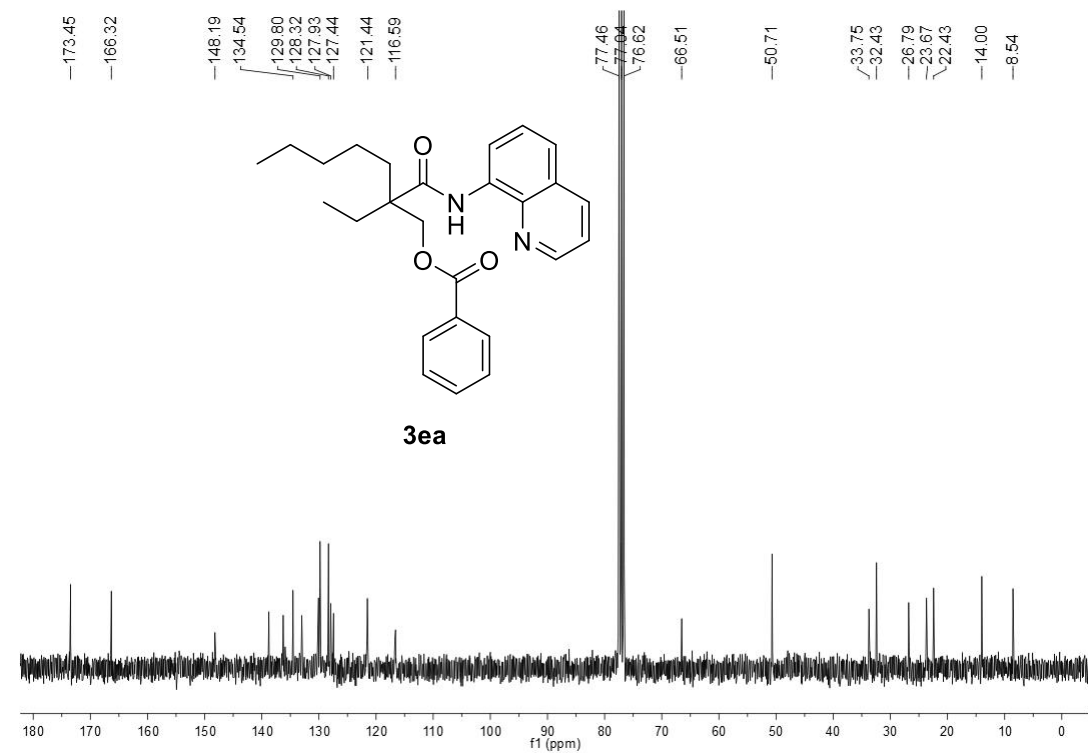

Figure S99. <sup>1</sup>H NMR Spectra of compound 3fa

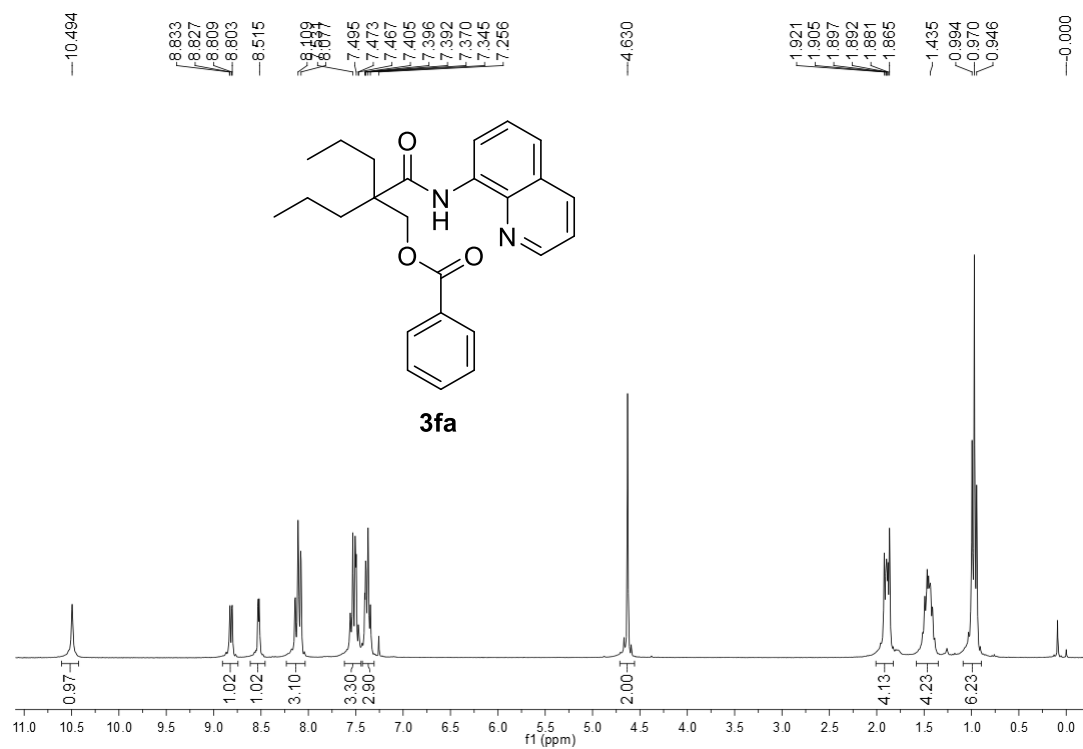

Figure S100. <sup>13</sup>C NMR Spectra of compound 3fa

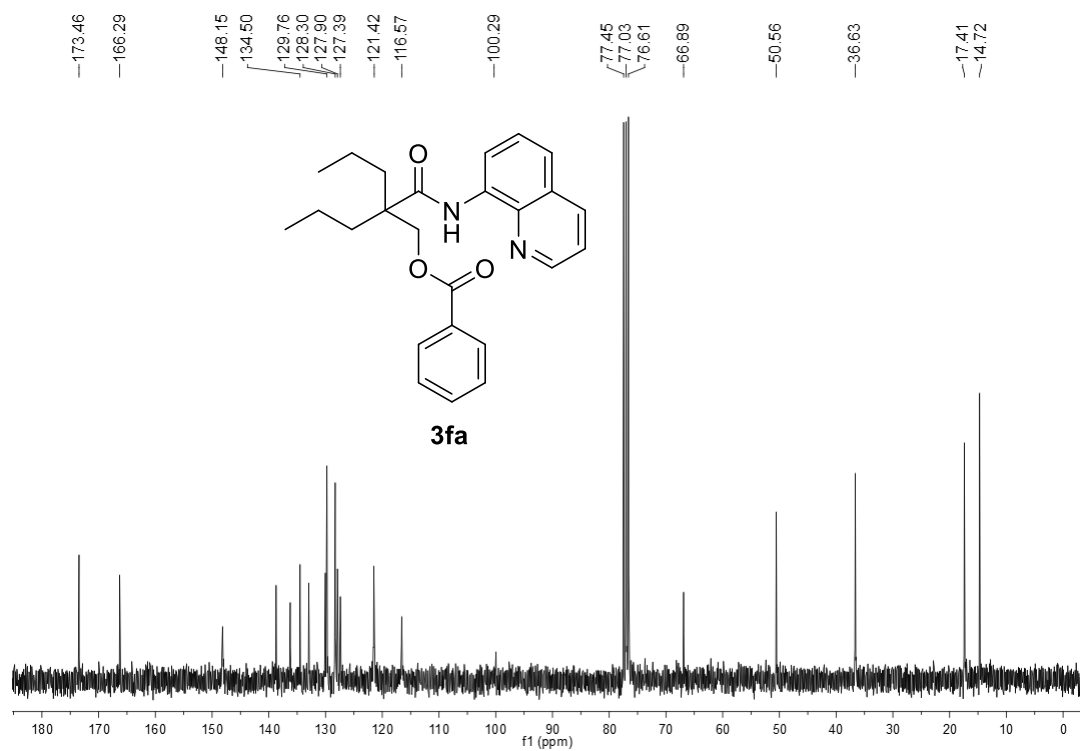



Figure S101. <sup>1</sup>H NMR Spectra of compound 3ga

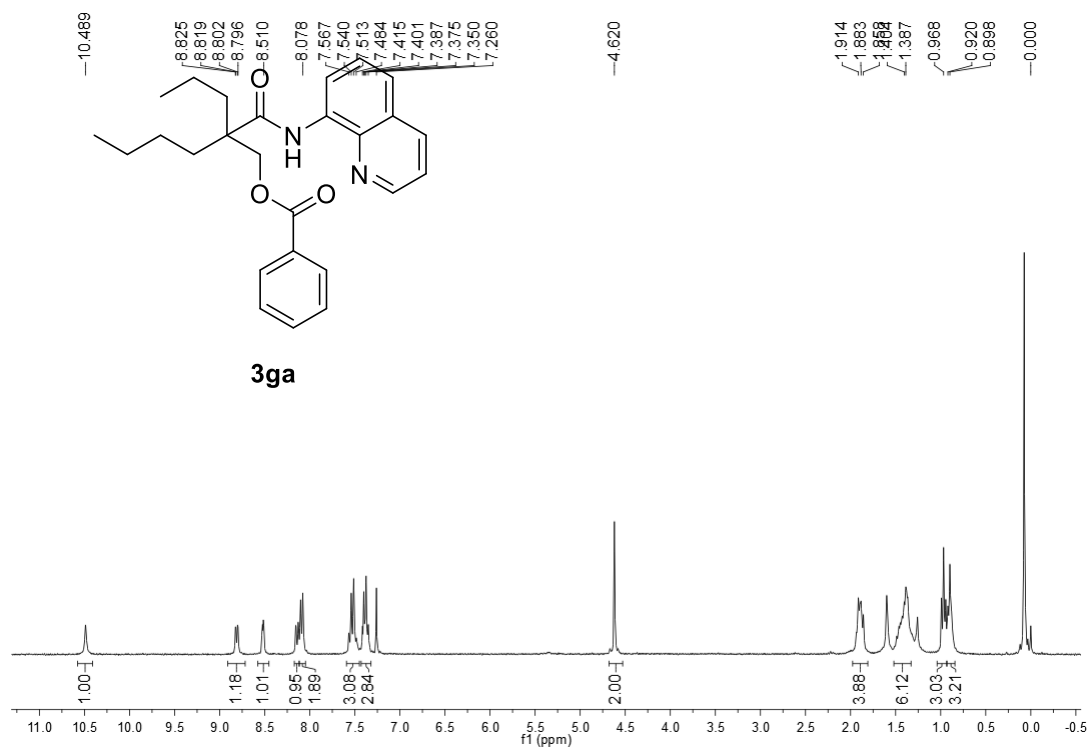

Figure S102. <sup>13</sup>C NMR Spectra of compound 3ga

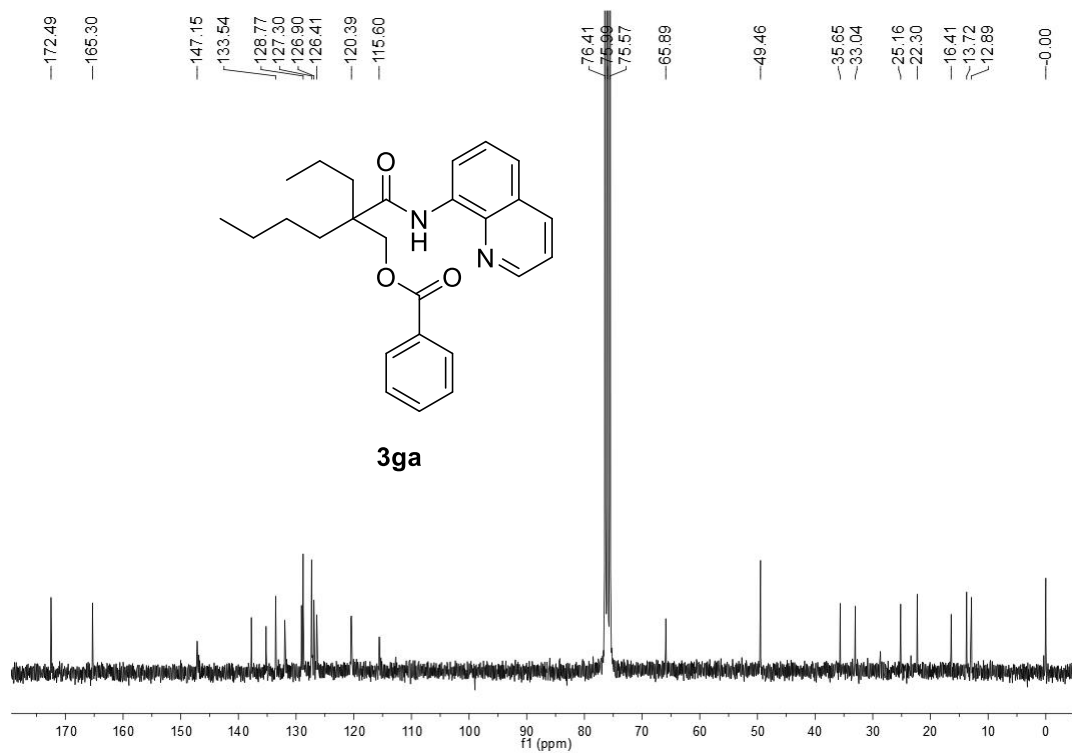

Figure S103. <sup>1</sup>H NMR Spectra of compound 3ha

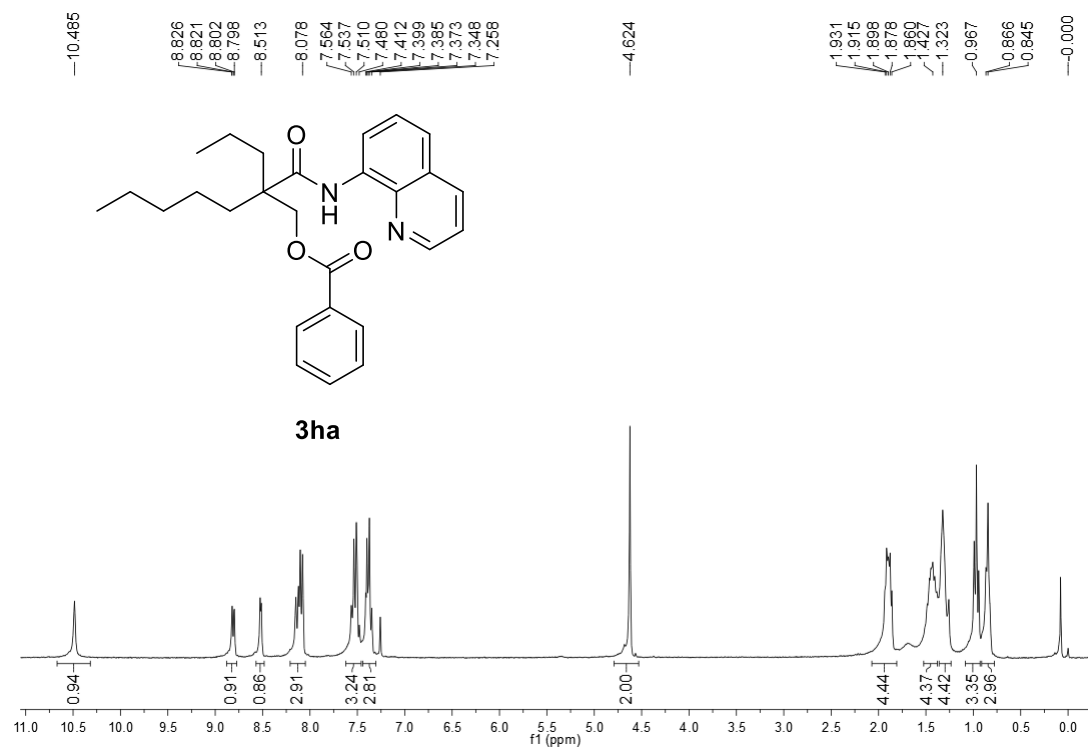

Figure S104. <sup>13</sup>C NMR Spectra of compound 3ha

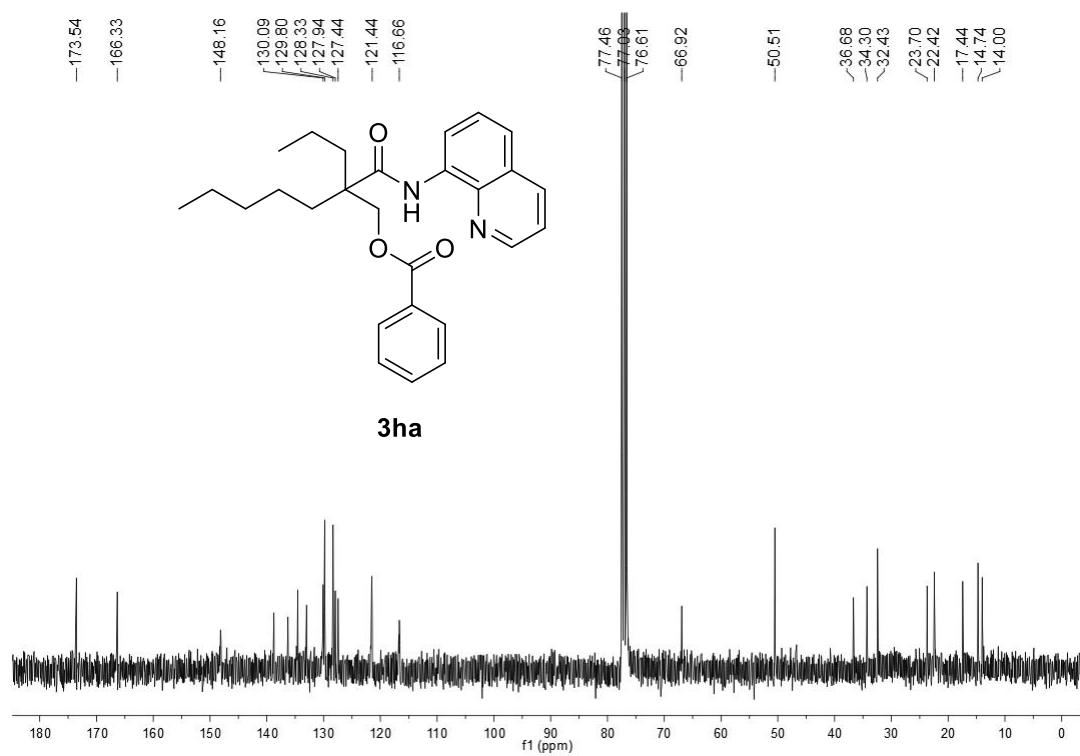

**Figure S105. <sup>1</sup>H NMR Spectra of compound 3ia**

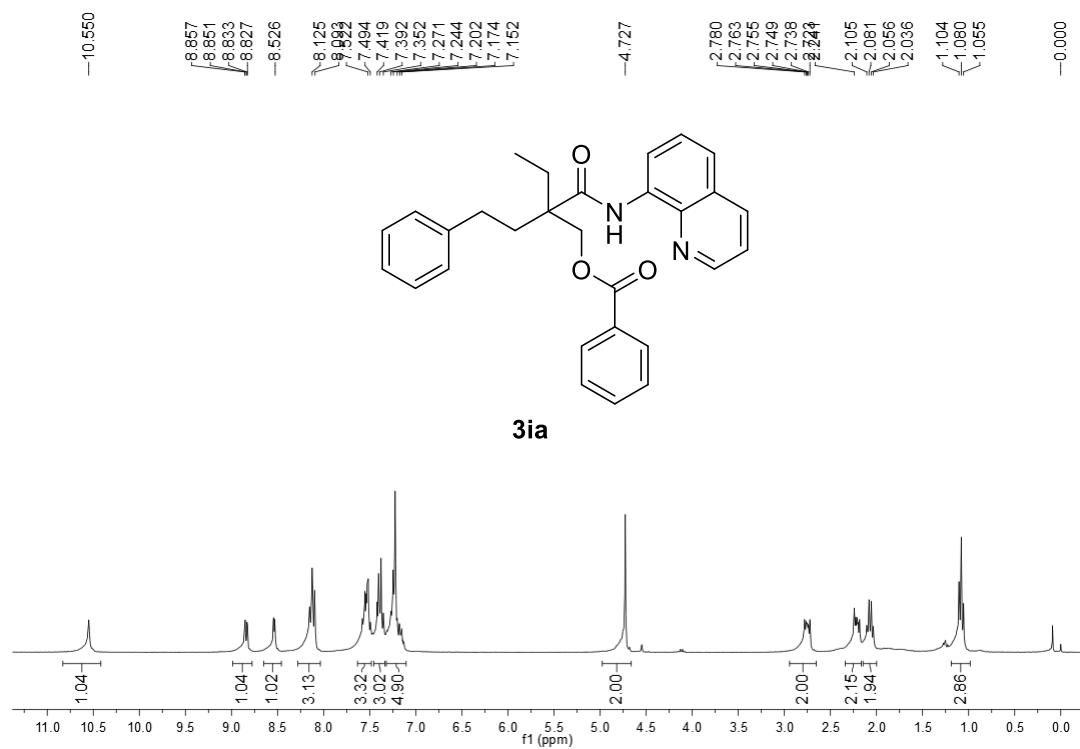

**Figure S106. <sup>13</sup>C NMR Spectra of compound 3ia**

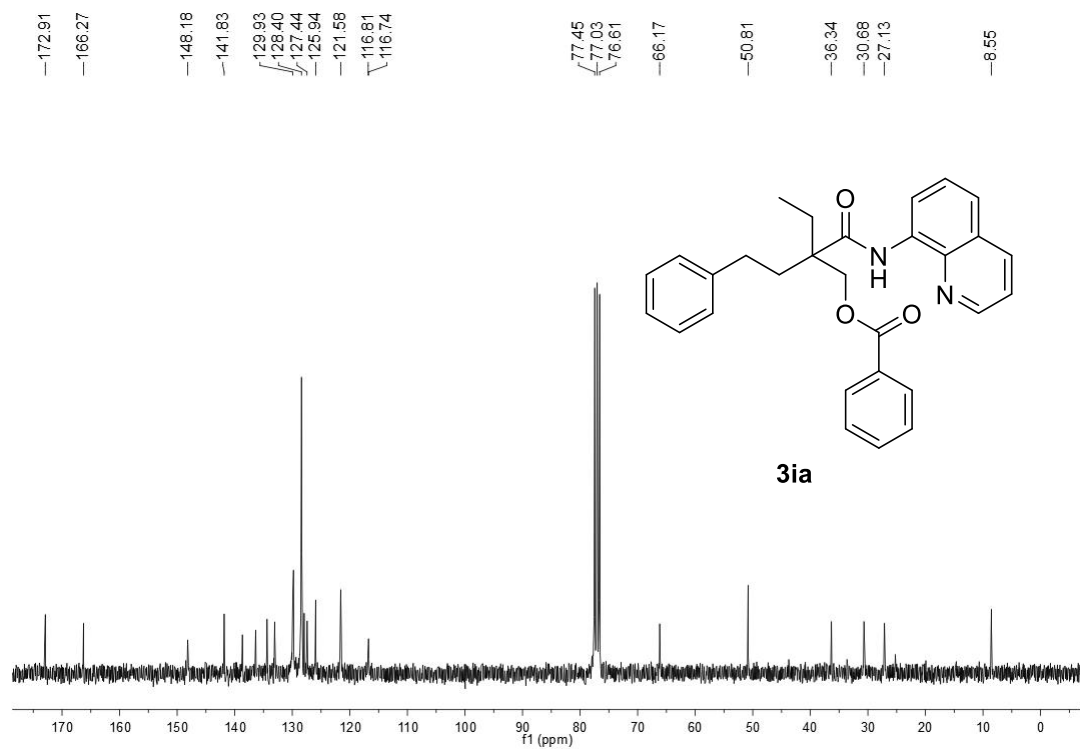

Figure S107. <sup>1</sup>H NMR Spectra of compound 3ja

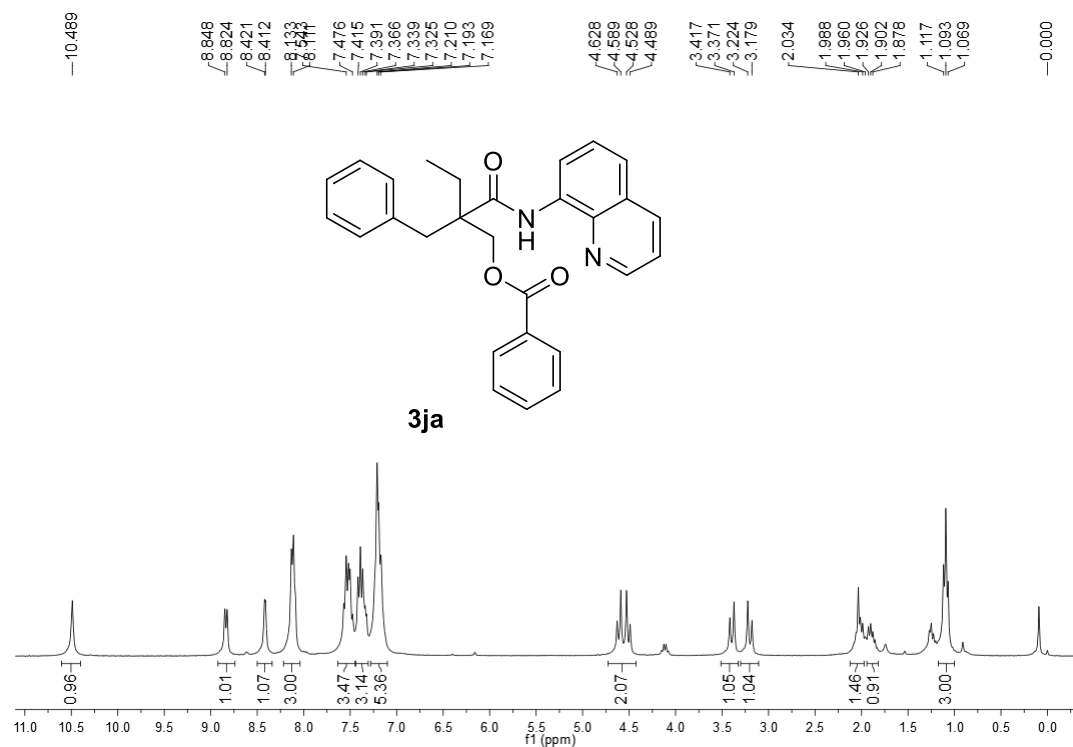

Figure S108. <sup>13</sup>C NMR Spectra of compound 3ja

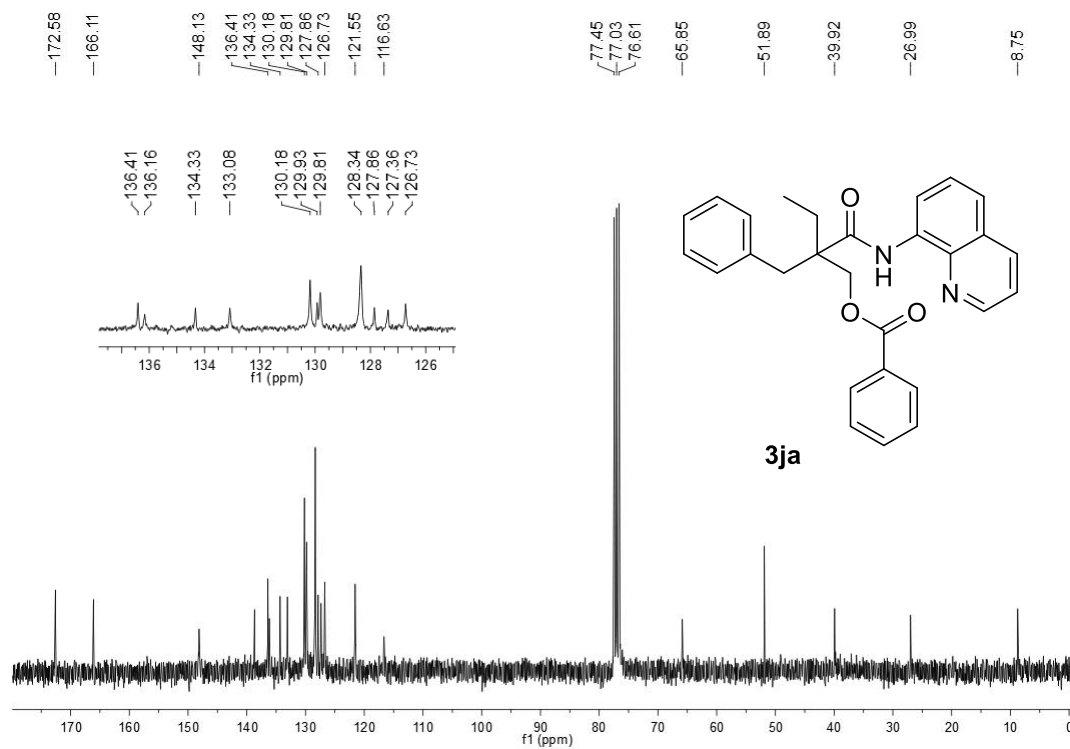

Figure S109. <sup>1</sup>H NMR Spectra of compound 3ka

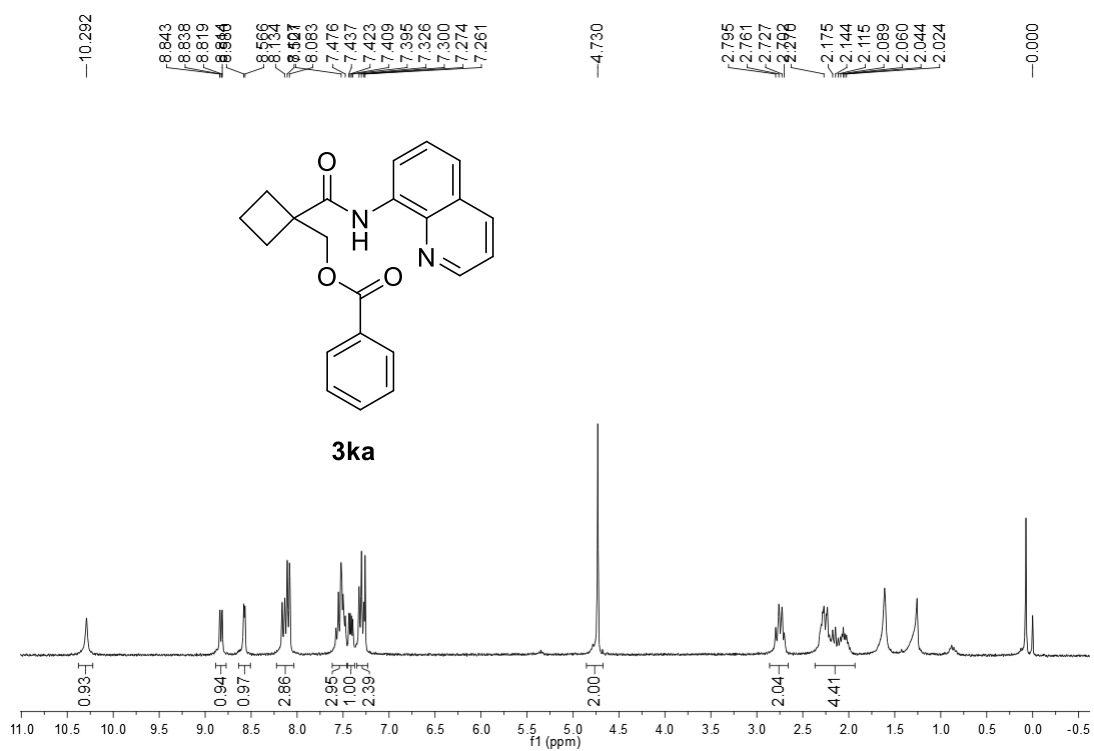

Figure S110. <sup>13</sup>C NMR Spectra of compound 3ka

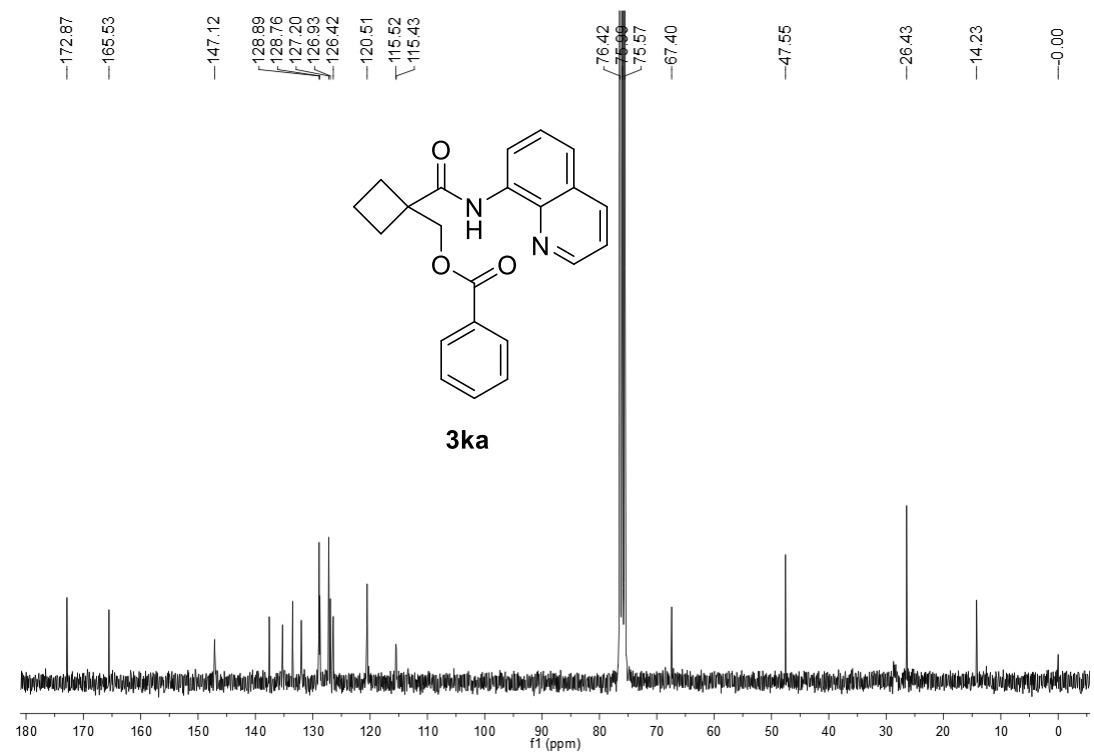

Figure S111. <sup>1</sup>H NMR Spectra of compound 3la

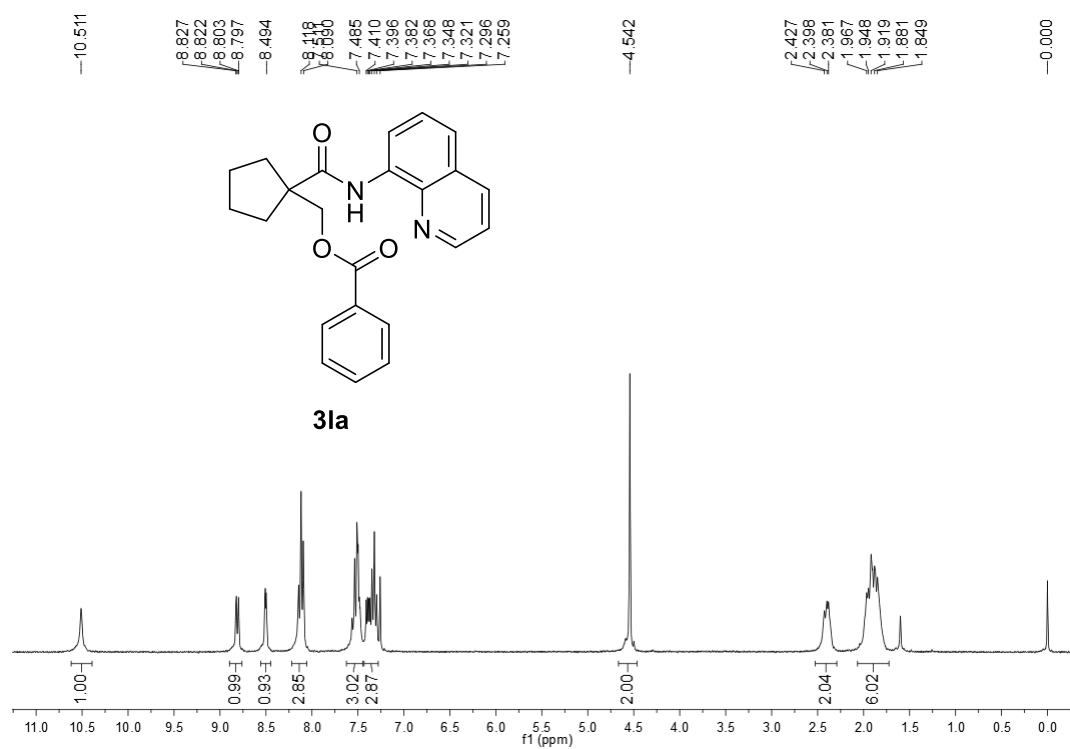

Figure S112. <sup>13</sup>C NMR Spectra of compound 3la

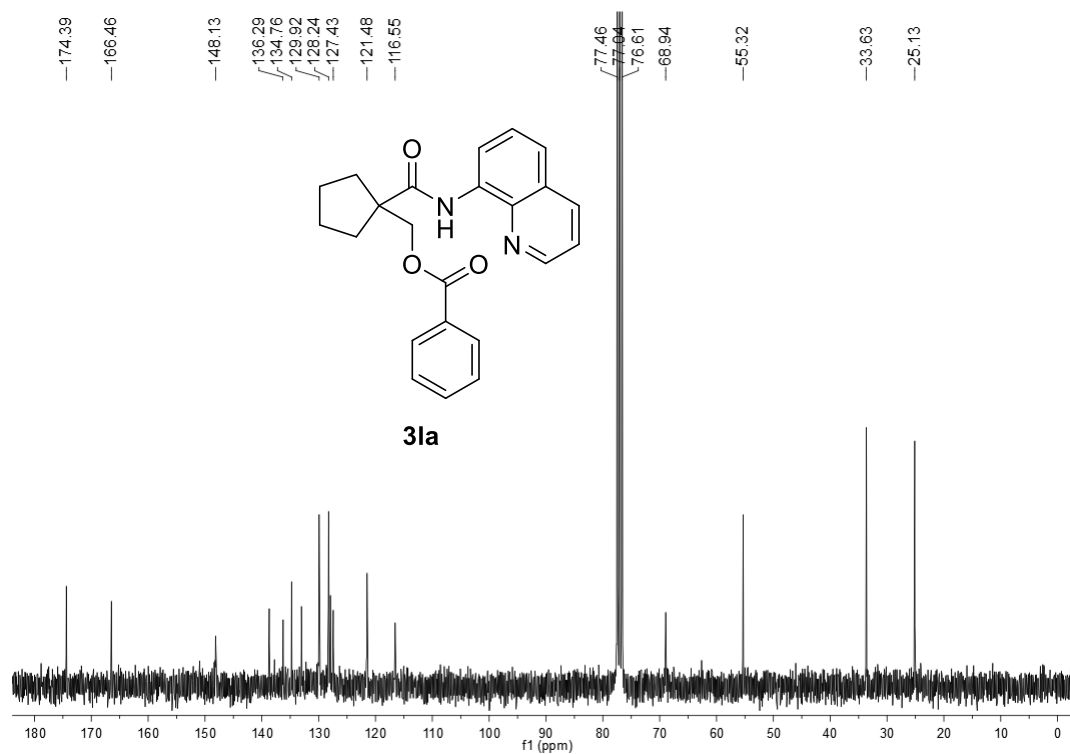

Figure S113. <sup>1</sup>H NMR Spectra of compound 4o

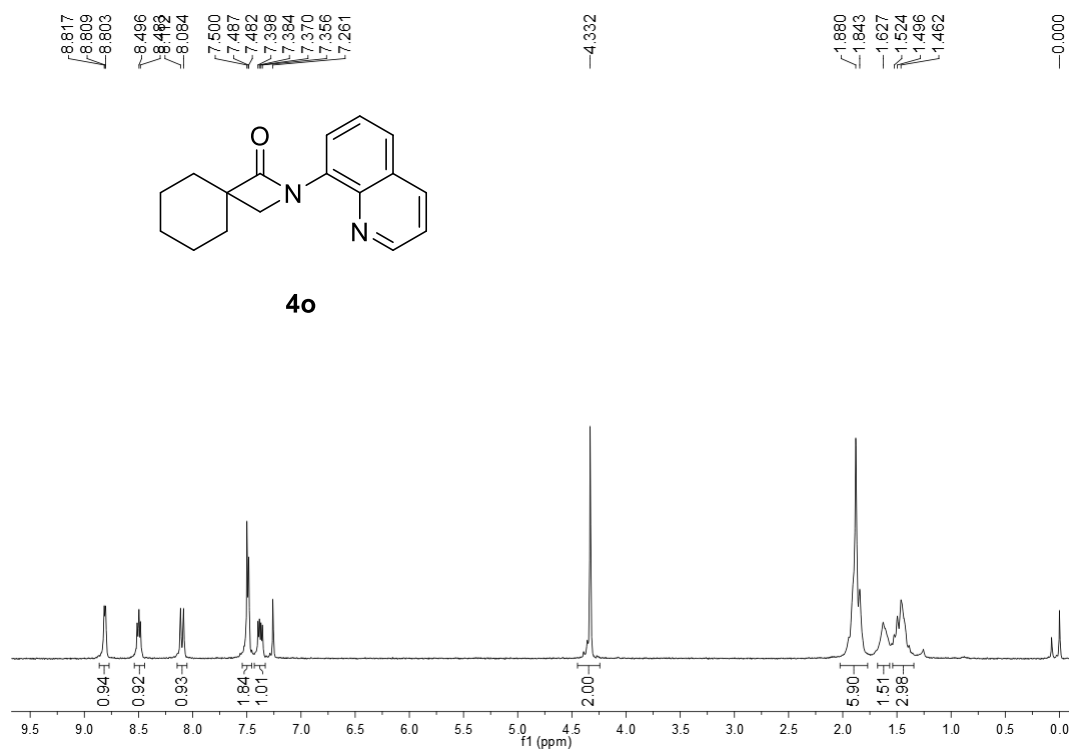

Figure S114. <sup>13</sup>C NMR Spectra of compound 4o

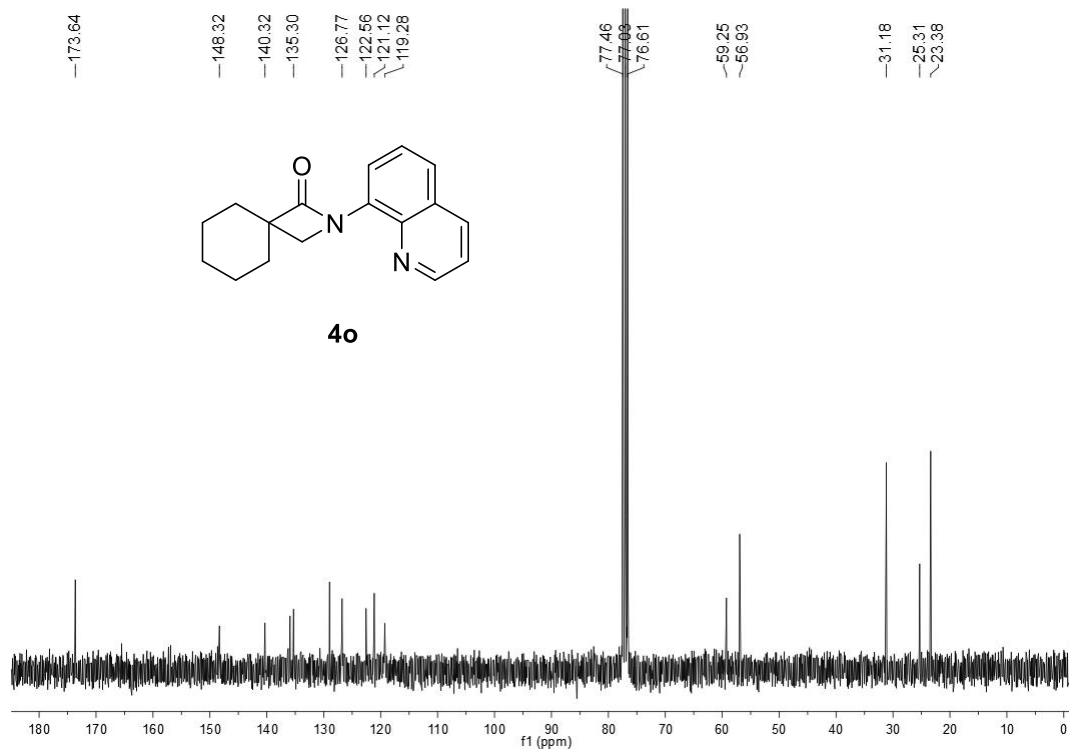

Supplement: ao8b02430_si_001.pdf [file ao8b02430_si_001.pdf]
